# Supplementary material for: Autism spectrum disorder: neuropathology and animal models
Source: Springer Nature journal article supplement (doi:10.1007/s00401-017-1736-4), 2017-06-05
Supplement: 401_2017_1736_MOESM1_ESM.pdf [file 401_2017_1736_MOESM1_ESM.pdf]

**SUPPLEMENTARY TABLE 1 Summary of genetically modified models of ASD**

| <b>Gene</b>   | <b>Whole brain</b>         | <b>Neocortex</b>                                                                                                                                                                                                                                                                                                                                                                   | <b>Hippocampus</b>                                                                                                                                                                 | <b>Amygdala</b> | <b>Cerebellum</b>                                            | <b>Striatum</b>                                                                                                |
|---------------|----------------------------|------------------------------------------------------------------------------------------------------------------------------------------------------------------------------------------------------------------------------------------------------------------------------------------------------------------------------------------------------------------------------------|------------------------------------------------------------------------------------------------------------------------------------------------------------------------------------|-----------------|--------------------------------------------------------------|----------------------------------------------------------------------------------------------------------------|
| <i>Nlgn3</i>  | Volume↓[71]                | (M-Excitatory spine turnover↑[41]<br>GABAergic synapses↔[80])                                                                                                                                                                                                                                                                                                                      | (M-Volume↓,<br>Dendrite complexity↑,<br>Spine density↔,<br>PSD length↔,<br>Presynaptic bouton size↓,<br>Presynaptic vesicle number↓,<br>Presynaptic spine area↓[22, 23])           |                 |                                                              | (M-Volume↓[20])                                                                                                |
| <i>Nlgn4</i>  | Volume↓[42]                |                                                                                                                                                                                                                                                                                                                                                                                    | Excitatory & inhibitory synapse markers↓[32]                                                                                                                                       |                 | Volume↓ [42]                                                 |                                                                                                                |
| <i>Nrxn1</i>  | (2KO- gross anatomy↔ [16]) | (2KO- inhibitory synapse density↓[58]<br>Volume↓,<br>Cell density↑,<br>Dendrite length↓,<br>Synapse ultrastructure↔ [16])                                                                                                                                                                                                                                                          |                                                                                                                                                                                    |                 | (3KO- inhibitory synapse density↓[58])                       |                                                                                                                |
| <i>Shank3</i> |                            | NMDAR↓,<br><br>Spine density↔[17]                                                                                                                                                                                                                                                                                                                                                  | GluR1↓[5]<br>Perforated synapse density↑ or ↔ [85]<br>Dendrite complexity↔,<br>Spine density↔[53, 88, 89] or ↓[89]<br>Spine length↑ or ↓[89]<br>PSD length↔,<br>PSD thickness↔[88] |                 | Dendrite complexity↑,<br>Spine density↓[51]                  | Dendrite length↑,<br><br>Dendrite complexity↑,<br>Spine density↓[66, 88]<br>PSD length↓,<br>PSD thickness↓[88] |
| <i>Mecp2</i>  | Brain weight↓[9, 29]       | Volume↓[26, 49, 74]<br>Cell density↑[26, 49, 78]<br>Cell size↓[49, 73, 87]<br>Dendrite length↓ [43, 49, 74, 78, 87] or ↔ [76]<br>Dendrite complexity↓[43, 49, 74, 78, 87].<br>Spine density↓[26, 74, 76, 78]<br>Abnormal axon orientation[3]<br>Glutamatergic synapse density↓[3, 8]<br>(KI-Dendrite length↑,<br>Dendrite complexity↑[45]<br>Glutamatergic synapse density↑[3, 8]) | Cell density↑[43]<br>Cell size↓[9, 29]<br><br>Spine density↓[3, 77]<br>Spine head size↓[3]                                                                                         |                 | Cell density↑[43]<br>Cell size↓[9]<br><br>Spine density↓[51] |                                                                                                                |

| Gene         | Whole brain           | Neocortex                                                                                                                                                                                                                                                                                                                                                                                         | Hippocampus                                                                                                                                                                                                                                                                                            | Amygdala                                                                                           | Cerebellum                                                            | Striatum                                               |
|--------------|-----------------------|---------------------------------------------------------------------------------------------------------------------------------------------------------------------------------------------------------------------------------------------------------------------------------------------------------------------------------------------------------------------------------------------------|--------------------------------------------------------------------------------------------------------------------------------------------------------------------------------------------------------------------------------------------------------------------------------------------------------|----------------------------------------------------------------------------------------------------|-----------------------------------------------------------------------|--------------------------------------------------------|
| <i>Fmr1</i>  |                       | Dendrite complexity↔, but directional↑[27]<br>Spine density↑[11, 13, 38-40, 63] or ↔[12, 28, 33, 83]<br>Spine length↑[13, 63] or ↔[12, 28, 33, 83]<br>Spine motility↑[13]<br>Spine turnover↑[12, 13, 60]<br>Filopodia↑,<br>Mature spines↓[12, 28, 56, 65, 83]<br><br>(KI-Dendrite complexity↔,<br>Spine density↑,<br>Spine length↑[70],<br>Atypical cell orientation during neuron migration[14]) | Spine density↔[30, 31]<br><br>Spine length↑[30, 67] or ↓[67]<br><br>Filopodia↑[30, 54] or ↔[54] or ↓[31]<br>Mature spines↓[30, 54] or ↔[54] or ↑[31]<br>Presynaptic active zone size↓,<br>Presynaptic docked vesicle number↓[50]<br>(KI-Dendrite complexity↓,<br>Spine density↑,<br>Spine length↑[70]) | Inhibitory synapses↓[64]<br><br>(KI-Dendrite complexity↓,<br>Spine density↑,<br>Spine length↑[70]) |                                                                       | PSD density↑,<br>PSD length↔,<br><br>Spine length↑[62] |
| <i>Ube3a</i> | Brain weight↓<br>[46] | Tissue weight ↓[46]<br>Cortical thickness↔,<br>Cell density↔[75, 86]<br>Spine density↓[15, 48, 75]<br>Thin spines↑,<br>Stubby spines↓ [48]<br>Presynaptic GABAergic vesicle density↑[86]<br>(KI: Spine density↑[92])                                                                                                                                                                              | Spine density↓,<br>Spine length↓[79]<br><br>Presynaptic vesicle density↓[79]                                                                                                                                                                                                                           |                                                                                                    | Tissue weight ↓[46]<br>Cell density↔,<br>Dendrite complexity↔<br>[15] |                                                        |
| <i>Tsc1</i>  |                       | Cell size↑[24, 57]/↔[81]<br>Dendrite complexity↔,<br>Spine density↑[81]                                                                                                                                                                                                                                                                                                                           | Cell size↑[57, 82]<br>Spine length↑,<br>Spine density↓[82]                                                                                                                                                                                                                                             |                                                                                                    | Cell density↓,<br>Cell size↑,<br>Spine density↑[84]                   |                                                        |
| <i>Tsc2</i>  |                       | Cell size↔,<br>Dendrite complexity↔,<br>Spine density↑[81]                                                                                                                                                                                                                                                                                                                                        | Spine length↑,<br>Excitatory synapse number↓[91]                                                                                                                                                                                                                                                       |                                                                                                    | Cell density↓[72]                                                     |                                                        |
| <i>Chd8</i>  |                       | Dendrite complexity↓,<br>Spine density↓[18]                                                                                                                                                                                                                                                                                                                                                       |                                                                                                                                                                                                                                                                                                        |                                                                                                    |                                                                       |                                                        |

| Gene                  | Whole brain                          | Neocortex                                                                                                                                       | Hippocampus                                                                                                                                                                      | Amygdala                              | Cerebellum | Striatum                                                                  |
|-----------------------|--------------------------------------|-------------------------------------------------------------------------------------------------------------------------------------------------|----------------------------------------------------------------------------------------------------------------------------------------------------------------------------------|---------------------------------------|------------|---------------------------------------------------------------------------|
| <i>Syngap1</i>        |                                      | Dendritic complexity early,<br>Spines formed early and pruned prematurely,<br>Spine size↑[1]<br>Bouton density↓,<br>Axon terminal branching↓[4] | Dendritic complexity↔,<br>Spines formed early and pruned prematurely<br>Spine size↑[10]<br>Thin and stubby spines↔,<br>Mushroom spines↑[7]<br>Spine density↔,<br>Spine types↔[2] |                                       |            |                                                                           |
| <i>Arid1b</i>         |                                      | Dendrite length↓,<br>Dendrite complexity↓,<br>Spine density↓,<br>Spine head size↓[47]                                                           | Dendrite length↓,<br>Dendrite complexity↓[47]                                                                                                                                    |                                       |            |                                                                           |
| <i>Grin2b</i>         |                                      | Neuron migration delayed,<br>Dendrite length↑,<br>Dendrite complexity↑[44]                                                                      | Spine density↓[6]                                                                                                                                                                |                                       |            |                                                                           |
| <i>Dscam</i>          |                                      | Volume↓,<br>Apical dendrite complexity↑,<br>Dendrite length↓,<br>Spine density↑ (all transient changes)[55]                                     |                                                                                                                                                                                  |                                       |            |                                                                           |
| <i>Tbr1</i>           |                                      | Defective cortical morphology,<br>Abnormal neuron migration,<br>Flawed axonal projection[34, 35]                                                |                                                                                                                                                                                  | Defective neuron differentiation [37] |            |                                                                           |
| 15q13.3 microdeletion | Volume↑[52]                          |                                                                                                                                                 |                                                                                                                                                                                  |                                       |            |                                                                           |
| 15q11-13 duplication  | Gross morphology↔ [61]               | Turnover of excitatory spines↑[41]                                                                                                              | Volume↓[21]                                                                                                                                                                      |                                       |            |                                                                           |
| 16p11.2 deletion      | Volume↑ [36]<br>Weight↓ [69] or↔[68] | Cortical size↓[69]<br>Dopaminergic cell number↓[68]                                                                                             |                                                                                                                                                                                  |                                       |            | Volume↑,<br>Cell density↑,<br>Dendrite complexity↔,<br>Spine density↔[68] |
| 16p11.2 duplication   | Volume↓[36]                          |                                                                                                                                                 |                                                                                                                                                                                  |                                       |            |                                                                           |

| Gene              | Whole brain | Neocortex                                                                                                                                                                                                                                                                                                      | Hippocampus                                                                                                                                                                                                      | Amygdala | Cerebellum | Striatum |
|-------------------|-------------|----------------------------------------------------------------------------------------------------------------------------------------------------------------------------------------------------------------------------------------------------------------------------------------------------------------|------------------------------------------------------------------------------------------------------------------------------------------------------------------------------------------------------------------|----------|------------|----------|
| 22q11.2 deletions |             | Cell number↓,<br>Inhibitory neurons↓,<br>Cell size↔,<br>Basal:<br>dendrite length↓,<br>dendrite complexity↓,<br>Spine density↓,<br>mushroom spines↓,<br>spine width↑[90]<br>Apical:<br>dendrite complexity↔,<br>spine density↔,<br>spine length↔,<br>mushroom spines↓,<br>spine width↓,<br>spine turnover↑[25] | Dendrite complexity↔[19]<br>Spine length↔[19] or↓[59],<br><br>Spine width↔[19]or↓[59]<br><br>Spine density↔,<br>PSD length↔[19]<br>Mushroom spines↓,<br>Excitatory synapse↓,<br>Presynaptic vesicle density↓[59] |          |            |          |

Neuropathologic changes observed following reduced expression of specific genes or chromosomes are indicated for each brain area (see text for details explaining the differences between and within models). Changes due to overexpression (knock-in, KI) or expression of a mutant version (M) of the gene are indicated in parentheses. The direction of the arrows indicates increase (↑), decrease (↓), or no change (↔) compared to controls. The apparently contradictory results within a model can be explained by transient changes that occur with age, differences in location of the cells, or altered spine turnover rate.

## References:

- 1 Aceti M, Creson TK, Vaissiere T, Rojas C, Huang WC, Wang YX, Petralia RS, Page DT, Miller CA, Rumbaugh G (2015) Syngap1 haploinsufficiency damages a postnatal critical period of pyramidal cell structural maturation linked to cortical circuit assembly. *Biol Psychiatry* 77: 805-815 Doi [10.1016/j.biopsych.2014.08.001](https://doi.org/10.1016/j.biopsych.2014.08.001)
- 2 Barnes SA, Wijetunge LS, Jackson AD, Katsanevaki D, Osterweil EK, Komiyama NH, Grant SG, Bear MF, Nagerl UV, Kind PC, et al (2015) Convergence of hippocampal pathophysiology in Syngap+/- and Fmr1-/-y Mice. *J Neurosci* 35: 15073-15081 Doi [10.1523/JNEUROSCI.1087-15.2015](https://doi.org/10.1523/JNEUROSCI.1087-15.2015)
- 3 Belichenko PV, Wright EE, Belichenko NP, Masliah E, Li HH, Mobley WC, Francke U (2009) Widespread changes in dendritic and axonal morphology in Mecp2-mutant mouse models of Rett syndrome: evidence for disruption of neuronal networks. *J Comp Neurol* 514: 240-258 Doi [10.1002/cne.22009](https://doi.org/10.1002/cne.22009)
- 4 Berryer MH, Chattopadhyaya B, Xing P, Riebe I, Bosoi C, Sanon N, Antoine-Bertrand J, Levesque M, Avoli M, Hamdan FF, et al (2016) Decrease of SYNGAP1 in GABAergic cells impairs inhibitory synapse connectivity, synaptic inhibition and cognitive function. *Nat Commun* 7: 13340 Doi [10.1038/ncomms13340](https://doi.org/10.1038/ncomms13340)
- 5 Bozdagi O, Sakurai T, Papapetrou D, Wang XB, Dickstein DL, Takahashi N, Kajiwara Y, Yang M, Katz AM, Scattoni ML, et al (2010) Haploinsufficiency of the autism-associated Shank3 gene leads to deficits in synaptic function, social interaction, and social communication. *Mol Autism* 1: Doi [10.1186/2040-2392-1-15](https://doi.org/10.1186/2040-2392-1-15)

- 6 Brigman JL, Wright T, Talani G, Prasad-Mulcare S, Jinde S, Seabold GK, Mathur P, Davis MI, Bock R, Gustin RM, et al (2010) Loss of GluN2B-containing NMDA receptors in CA1 hippocampus and cortex impairs long-term depression, reduces dendritic spine density, and disrupts learning. *J Neurosci* 30: 4590-4600 Doi [10.1523/JNEUROSCI.0640-10.2010](https://doi.org/10.1523/JNEUROSCI.0640-10.2010)
- 7 Carlisle HJ, Manzerra P, Marcora E, Kennedy MB (2008) SynGAP regulates steady-state and activity-dependent phosphorylation of cofilin. *J Neurosci* 28: 13673-13683 Doi [10.1523/JNEUROSCI.4695-08.2008](https://doi.org/10.1523/JNEUROSCI.4695-08.2008)
- 8 Chao HT, Zoghbi HY, Rosenmund C (2007) MeCP2 controls excitatory synaptic strength by regulating glutamatergic synapse number. *Neuron* 56: 58-65 Doi [10.1016/j.neuron.2007.08.018](https://doi.org/10.1016/j.neuron.2007.08.018)
- 9 Chen RZ, Akbarian S, Tudor M, Jaenisch R (2001) Deficiency of methyl-CpG binding protein-2 in CNS neurons results in a Rett-like phenotype in mice. *Nat Genet* 27: 327-331 Doi [10.1038/85906](https://doi.org/10.1038/85906)
- 10 Clement JP, Aceti M, Creson TK, Ozkan ED, Shi Y, Reish NJ, Almonte AG, Miller BH, Wiltgen BJ, Miller CA, et al (2012) Pathogenic SYNGAP1 mutations impair cognitive development by disrupting maturation of dendritic spine synapses. *Cell* 151: 709-723 Doi [10.1016/j.cell.2012.08.045](https://doi.org/10.1016/j.cell.2012.08.045)
- 11 Comery TA, Harris JB, Willems PJ, Oostra BA, Irwin SA, Weiler IJ, Greenough WT (1997) Abnormal dendritic spines in fragile X knockout mice: maturation and pruning deficits. *Proc Natl Acad Sci U S A* 94: 5401-5404
- 12 Cruz-Martín A, Crespo M, Portera-Cailliau C (2010) Delayed stabilization of dendritic spines in fragile X mice. *J Neurosci* 30: 7793-7803 Doi [10.1523/JNEUROSCI.0577-10.2010](https://doi.org/10.1523/JNEUROSCI.0577-10.2010)
- 13 Cruz-Martín A, Crespo M, Portera-Cailliau C (2012) Glutamate induces the elongation of early dendritic protrusions via mGluRs in wild type mice, but not in fragile X mice. *PLoS One* 7: e32446 Doi [10.1371/journal.pone.0032446](https://doi.org/10.1371/journal.pone.0032446)
- 14 Cunningham CL, Martinez Cerdeno V, Navarro Porrás E, Prakash AN, Angelastro JM, Willemsen R, Hagerman PJ, Pessah IN, Berman RF, Noctor SC (2011) Premutation CGG-repeat expansion of the *Fmr1* gene impairs mouse neocortical development. *Hum Mol Genet* 20: 64-79 Doi [10.1093/hmg/ddq432](https://doi.org/10.1093/hmg/ddq432)
- 15 Dindot SV, Antalffy BA, Bhattacharjee MB, Beaudet AL (2008) The Angelman syndrome ubiquitin ligase localizes to the synapse and nucleus, and maternal deficiency results in abnormal dendritic spine morphology. *Hum Mol Genet* 17: 111-118 Doi [10.1093/hmg/ddm288](https://doi.org/10.1093/hmg/ddm288)
- 16 Dudanova I, Tabuchi K, Rohlmann A, Südhof TC, Missler M (2007) Deletion of alpha-neurexins does not cause a major impairment of axonal pathfinding or synapse formation. *J Comp Neurol* 502: 261-274 Doi [10.1002/cne.21305](https://doi.org/10.1002/cne.21305)
- 17 Duffney LJ, Zhong P, Wei J, Matas E, Cheng J, Qin L, Ma K, Dietz DM, Kajiwara Y, Buxbaum JD, et al (2015) Autism-like deficits in Shank3-deficient mice are rescued by targeting actin regulators. *Cell Rep* 11: 1400-1413 Doi [10.1016/j.celrep.2015.04.064](https://doi.org/10.1016/j.celrep.2015.04.064)
- 18 Durak O, Gao F, Kaeser-Woo YJ, Rueda R, Martorell AJ, Nott A, Liu CY, Watson LA, Tsai LH (2016) Chd8 mediates cortical neurogenesis via transcriptional regulation of cell cycle and Wnt signaling. *Nat Neurosci* 19: 1477-1488 Doi [10.1038/nn.4400](https://doi.org/10.1038/nn.4400)
- 19 Earls LR, Bayazitov IT, Fricke RG, Berry RB, Illingworth E, Mittleman G, Zakharenko SS (2010) Dysregulation of presynaptic calcium and synaptic plasticity in a mouse model of 22q11 deletion syndrome. *J Neurosci* 30: 15843-15855 Doi [10.1523/JNEUROSCI.1425-10.2010](https://doi.org/10.1523/JNEUROSCI.1425-10.2010)
- 20 Ellegood J, Lerch JP, Henkelman RM (2011) Brain abnormalities in a Neurologin3 R451C knockin mouse model associated with autism. *Autism Res* 4: 368-376 Doi [10.1002/aur.215](https://doi.org/10.1002/aur.215)
- 21 Ellegood J, Nakai N, Nakatani J, Henkelman M, Takumi T, Lerch J (2015) Neuroanatomical phenotypes are consistent with autism-like behavioral phenotypes in the 15q11-13 duplication mouse model. *Autism Res* 8: 545-555 Doi [10.1002/aur.1469](https://doi.org/10.1002/aur.1469)
- 22 Etherton M, Foldy C, Sharma M, Tabuchi K, Liu X, Shamloo M, Malenka RC, Südhof TC (2011) Autism-linked neurologin-3 R451C mutation differentially alters hippocampal and cortical synaptic function. *Proc Natl Acad Sci U S A* 108: 13764-13769 Doi [10.1073/pnas.1111093108](https://doi.org/10.1073/pnas.1111093108)
- 23 Etherton MR, Tabuchi K, Sharma M, Ko J, Südhof TC (2011) An autism-associated point mutation in the neurologin cytoplasmic tail selectively impairs AMPA receptor-mediated synaptic transmission in hippocampus. *EMBO J* 30: 2908-2919 Doi [10.1038/emboj.2011.182](https://doi.org/10.1038/emboj.2011.182)
- 24 Feliciano DM, Su T, Lopez J, Platel JC, Bordey A (2011) Single-cell *Tsc1* knockout during corticogenesis generates tuber-like lesions and reduces seizure threshold in mice. *J Clin Invest* 121: 1596-1607 Doi [10.1172/JCI44909](https://doi.org/10.1172/JCI44909)
- 25 Fenelon K, Xu B, Lai CS, Mukai J, Markx S, Stark KL, Hsu PK, Gan WB, Fischbach GD, MacDermott AB, et al (2013) The pattern of cortical dysfunction in a mouse model of a schizophrenia-related microdeletion. *J Neurosci* 33: 14825-14839 Doi [10.1523/JNEUROSCI.1611-13.2013](https://doi.org/10.1523/JNEUROSCI.1611-13.2013)

- 26 Fukuda T, Itoh M, Ichikawa T, Washiyama K, Goto Y (2005) Delayed maturation of neuronal architecture and synaptogenesis in cerebral cortex of Mecp2-deficient mice. *J Neuropathol Exp Neurol* 64: 537-544
- 27 Galvez R, Gopal AR, Greenough WT (2003) Somatosensory cortical barrel dendritic abnormalities in a mouse model of the fragile X mental retardation syndrome. *Brain Res* 971: 83-89
- 28 Galvez R, Greenough WT (2005) Sequence of abnormal dendritic spine development in primary somatosensory cortex of a mouse model of the fragile X mental retardation syndrome. *Am J Med Genet A* 135: 155-160 Doi [10.1002/ajmg.a.30709](https://doi.org/10.1002/ajmg.a.30709)
- 29 Goffin D, Allen M, Zhang L, Amorim M, Wang IT, Reyes AR, Mercado-Berton A, Ong C, Cohen S, Hu L, et al (2012) Rett syndrome mutation MeCP2 T158A disrupts DNA binding, protein stability and ERP responses. *Nat Neurosci* 15: 274-283 Doi [10.1038/nn.2997](https://doi.org/10.1038/nn.2997)
- 30 Grossman AW, Aldridge GM, Lee KJ, Zeman MK, Jun CS, Azam HS, Arii T, Imoto K, Greenough WT, Rhyu IJ (2010) Developmental characteristics of dendritic spines in the dentate gyrus of Fmr1 knockout mice. *Brain Res* 1355: 221-227 Doi [10.1016/j.brainres.2010.07.090](https://doi.org/10.1016/j.brainres.2010.07.090)
- 31 Grossman AW, Elisseou NM, McKinney BC, Greenough WT (2006) Hippocampal pyramidal cells in adult Fmr1 knockout mice exhibit an immature-appearing profile of dendritic spines. *Brain Res* 1084: 158-164 Doi [10.1016/j.brainres.2006.02.044](https://doi.org/10.1016/j.brainres.2006.02.044)
- 32 Hammer M, Krueger-Burg D, Tuffy LP, Cooper BH, Taschenberger H, Goswami SP, Ehrenreich H, Jonas P, Varoqueaux F, Rhee JS, et al (2015) Perturbed hippocampal synaptic inhibition and gamma-oscillations in a Neuroigin-4 knockout mouse model of autism. *Cell Rep* 13: 516-523 Doi [10.1016/j.celrep.2015.09.011](https://doi.org/10.1016/j.celrep.2015.09.011)
- 33 Harlow EG, Till SM, Russell TA, Wijetunge LS, Kind P, Contractor A (2010) Critical period plasticity is disrupted in the barrel cortex of FMR1 knockout mice. *Neuron* 65: 385-398 Doi [10.1016/j.neuron.2010.01.024](https://doi.org/10.1016/j.neuron.2010.01.024)
- 34 Hevner RF, Miyashita-Lin E, Rubenstein JL (2002) Cortical and thalamic axon pathfinding defects in Tbr1, Gbx2, and Pax6 mutant mice: evidence that cortical and thalamic axons interact and guide each other. *J Comp Neurol* 447: 8-17 Doi [10.1002/cne.10219](https://doi.org/10.1002/cne.10219)
- 35 Hevner RF, Shi L, Justice N, Hsueh Y, Sheng M, Smiga S, Bulfone A, Goffinet AM, Campagnoni AT, Rubenstein JL (2001) Tbr1 regulates differentiation of the preplate and layer 6. *Neuron* 29: 353-366
- 36 Horev G, Ellegood J, Lerch JP, Son YE, Muthuswamy L, Vogel H, Krieger AM, Buja A, Henkelman RM, Wigler M, et al (2011) Dosage-dependent phenotypes in models of 16p11.2 lesions found in autism. *Proc Natl Acad Sci U S A* 108: 17076-17081 Doi [10.1073/pnas.1114042108](https://doi.org/10.1073/pnas.1114042108)
- 37 Huang TN, Chuang HC, Chou WH, Chen CY, Wang HF, Chou SJ, Hsueh YP (2014) Tbr1 haploinsufficiency impairs amygdalar axonal projections and results in cognitive abnormality. *Nat Neurosci* 17: 240-247 Doi [10.1038/nn.3626](https://doi.org/10.1038/nn.3626)
- 38 Irwin SA, Galvez R, Greenough WT (2000) Dendritic spine structural anomalies in fragile-X mental retardation syndrome. *Cereb Cortex* 10: 1038-1044
- 39 Irwin SA, Idupulapati M, Gilbert ME, Harris JB, Chakravarti AB, Rogers EJ, Crisostomo RA, Larsen BP, Mehta A, Alcantara CJ, et al (2002) Dendritic spine and dendritic field characteristics of layer V pyramidal neurons in the visual cortex of fragile-X knockout mice. *Am J Med Genet* 111: 140-146 Doi [10.1002/ajmg.10500](https://doi.org/10.1002/ajmg.10500)
- 40 Irwin SA, Patel B, Idupulapati M, Harris JB, Crisostomo RA, Larsen BP, Kooy F, Willems PJ, Cras P, Kozlowski PB, et al (2001) Abnormal dendritic spine characteristics in the temporal and visual cortices of patients with fragile-X syndrome: a quantitative examination. *Am J Med Genet* 98: 161-167 Doi [10.1002/1096-8628\(20010115\)98:2%3C161::AID-AJMG1025%3E3.0.CO:2-B](https://doi.org/10.1002/1096-8628(20010115)98:2%3C161::AID-AJMG1025%3E3.0.CO:2-B) [pii]
- 41 Isshiki M, Tanaka S, Kuriu T, Tabuchi K, Takumi T, Okabe S (2014) Enhanced synapse remodelling as a common phenotype in mouse models of autism. *Nat Commun* 5: 4742 Doi [10.1038/ncomms5742](https://doi.org/10.1038/ncomms5742)
- 42 Jamain S, Radyushkin K, Hammerschmidt K, Granon S, Boretius S, Varoqueaux F, Ramanantsoa N, Gallego J, Ronnenberg A, Winter D, et al (2008) Reduced social interaction and ultrasonic communication in a mouse model of monogenic heritable autism. *Proc Natl Acad Sci U S A* 105: 1710-1715 Doi [10.1073/pnas.0711555105](https://doi.org/10.1073/pnas.0711555105)
- 43 Jentarra GM, Olfers SL, Rice SG, Srivastava N, Homanics GE, Blue M, Naidu S, Narayanan V (2010) Abnormalities of cell packing density and dendritic complexity in the Mecp2 A140V mouse model of Rett syndrome/X-linked mental retardation. *BMC Neurosci* 11: 19 Doi [10.1186/1471-2202-11-19](https://doi.org/10.1186/1471-2202-11-19)
- 44 Jiang H, Jiang W, Zou J, Wang B, Yu M, Pan Y, Lin Y, Mao Y, Wang Y (2015) The GluN2B subunit of N-methyl-D-aspartate receptor regulates the radial migration of cortical neurons in vivo. *Brain Res* 1610: 20-32 Doi [10.1016/j.brainres.2015.03.031](https://doi.org/10.1016/j.brainres.2015.03.031)
- 45 Jiang M, Ash RT, Baker SA, Suter B, Ferguson A, Park J, Rudy J, Torsky SP, Chao HT, Zoghbi HY, et al (2013) Dendritic arborization and spine dynamics are abnormal in the mouse model of MECP2 duplication syndrome. *J Neurosci* 33: 19518-19533 Doi [10.1523/JNEUROSCI.1745-13.2013](https://doi.org/10.1523/JNEUROSCI.1745-13.2013)

- 46 Jiang YH, Armstrong D, Albrecht U, Atkins CM, Noebels JL, Eichele G, Sweatt JD, Beaudet AL (1998) Mutation of the Angelman ubiquitin ligase in mice causes increased cytoplasmic p53 and deficits of contextual learning and long-term potentiation. *Neuron* 21: 799-811 Doi [S0896-6273\(00\)80596-6](https://doi.org/10.1016/S0896-6273(00)80596-6) [pii]
- 47 Ka M, Chopra DA, Dravid SM, Kim WY (2016) Essential roles for ARID1B in dendritic arborization and spine morphology of developing pyramidal neurons. *J Neurosci* 36: 2723-2742 Doi [10.1523/JNEUROSCI.2321-15.2016](https://doi.org/10.1523/JNEUROSCI.2321-15.2016)
- 48 Kim H, Kunz PA, Mooney R, Philpot BD, Smith SL (2016) Maternal loss of Ube3a impairs experience-driven dendritic spine maintenance in the developing visual cortex. *J Neurosci* 36: 4888-4894 Doi [10.1523/JNEUROSCI.4204-15.2016](https://doi.org/10.1523/JNEUROSCI.4204-15.2016)
- 49 Kishi N, Macklis JD (2004) MECP2 is progressively expressed in post-migratory neurons and is involved in neuronal maturation rather than cell fate decisions. *Mol Cell Neurosci* 27: 306-321 Doi [10.1016/j.mcn.2004.07.006](https://doi.org/10.1016/j.mcn.2004.07.006)
- 50 Klemmer P, Meredith RM, Holmgren CD, Klychnikov OI, Stahl-Zeng J, Loos M, van der Schors RC, Wortel J, de Wit H, Spijker S, et al (2011) Proteomics, ultrastructure, and physiology of hippocampal synapses in a fragile X syndrome mouse model reveal presynaptic phenotype. *J Biol Chem* 286: 25495-25504 Doi [10.1074/jbc.M110.210260](https://doi.org/10.1074/jbc.M110.210260)
- 51 Kloth AD, Badura A, Li A, Cherskov A, Connolly SG, Giovannucci A, Bangash MA, Grasselli G, Peñagarikano O, Piochon C, et al (2015) Cerebellar associative sensory learning defects in five mouse autism models. *Elife* 4: e06085 Doi [10.7554/eLife.06085](https://doi.org/10.7554/eLife.06085)
- 52 Kogan JH, Gross AK, Featherstone RE, Shin R, Chen Q, Heusner CL, Adachi M, Lin A, Walton NM, Miyoshi S, et al (2015) Mouse model of chromosome 15q13.3 microdeletion syndrome demonstrates features related to autism spectrum disorder. *J Neurosci* 35: 16282-16294 Doi [10.1523/JNEUROSCI.3967-14.2015](https://doi.org/10.1523/JNEUROSCI.3967-14.2015)
- 53 Kouser M, Speed HE, Dewey CM, Reimers JM, Widman AJ, Gupta N, Liu S, Jaramillo TC, Bangash M, Xiao B, et al (2013) Loss of predominant Shank3 isoforms results in hippocampus-dependent impairments in behavior and synaptic transmission. *J Neurosci* 33: 18448-18468 Doi [10.1523/JNEUROSCI.3017-13.2013](https://doi.org/10.1523/JNEUROSCI.3017-13.2013)
- 54 Levenga J, de Vrij FM, Buijsen RA, Li T, Nieuwenhuizen IM, Pop A, Oostra BA, Willemsen R (2011) Subregion-specific dendritic spine abnormalities in the hippocampus of Fmr1 KO mice. *Neurobiol Learn Mem* 95: 467-472 Doi [10.1016/j.nlm.2011.02.009](https://doi.org/10.1016/j.nlm.2011.02.009)
- 55 Maynard KR, Stein E (2012) DSCAM contributes to dendrite arborization and spine formation in the developing cerebral cortex. *J Neurosci* 32: 16637-16650 Doi [10.1523/JNEUROSCI.2811-12.2012](https://doi.org/10.1523/JNEUROSCI.2811-12.2012)
- 56 McKinney BC, Grossman AW, Elisseou NM, Greenough WT (2005) Dendritic spine abnormalities in the occipital cortex of C57BL/6 Fmr1 knockout mice. *Am J Med Genet B Neuropsychiatr Genet* 136B: 98-102 Doi [10.1002/ajmg.b.30183](https://doi.org/10.1002/ajmg.b.30183)
- 57 Meikle L, Talos DM, Onda H, Pollizzi K, Rotenberg A, Sahin M, Jensen FE, Kwiatkowski DJ (2007) A mouse model of tuberous sclerosis: neuronal loss of Tsc1 causes dysplastic and ectopic neurons, reduced myelination, seizure activity, and limited survival. *J Neurosci* 27: 5546-5558 Doi [10.1523/JNEUROSCI.5540-06.2007](https://doi.org/10.1523/JNEUROSCI.5540-06.2007)
- 58 Missler M, Zhang W, Rohlmann A, Kattenstroth G, Hammer RE, Gottmann K, Südhof TC (2003) Alpha-neurexins couple Ca<sup>2+</sup> channels to synaptic vesicle exocytosis. *Nature* 423: 939-948 Doi [10.1038/nature01755](https://doi.org/10.1038/nature01755)
- 59 Mukai J, Dhillia A, Drew LJ, Stark KL, Cao L, MacDermott AB, Karayiorgou M, Gogos JA (2008) Palmitoylation-dependent neurodevelopmental deficits in a mouse model of 22q11 microdeletion. *Nat Neurosci* 11: 1302-1310 Doi [10.1038/nn.2204](https://doi.org/10.1038/nn.2204)
- 60 Nagaoka A, Takehara H, Hayashi-Takagi A, Noguchi J, Ishii K, Shirai F, Yagishita S, Akagi T, Ichiki T, Kasai H (2016) Abnormal intrinsic dynamics of dendritic spines in a fragile X syndrome mouse model in vivo. *Sci Rep* 6: 26651 Doi [10.1038/srep26651](https://doi.org/10.1038/srep26651)
- 61 Nakatani J, Tamada K, Hatanaka F, Ise S, Ohta H, Inoue K, Tomonaga S, Watanabe Y, Chung YJ, Banerjee R, et al (2009) Abnormal behavior in a chromosome-engineered mouse model for human 15q11-13 duplication seen in autism. *Cell* 137: 1235-1246 Doi [10.1016/j.cell.2009.04.024](https://doi.org/10.1016/j.cell.2009.04.024)
- 62 Neuhofer D, Henstridge CM, Dudok B, Sepers M, Lassalle O, Katona I, Manzoni OJ (2015) Functional and structural deficits at accumbens synapses in a mouse model of Fragile X. *Front Cell Neurosci* 9: 100 Doi [10.3389/fncel.2015.00100](https://doi.org/10.3389/fncel.2015.00100)
- 63 Nimchinsky EA, Oberlander AM, Svoboda K (2001) Abnormal development of dendritic spines in FMR1 knock-out mice. *J Neurosci* 21: 5139-5146
- 64 Olmos-Serrano JL, Paluszkiwicz SM, Martin BS, Kaufmann WE, Corbin JG, Huntsman MM (2010) Defective GABAergic neurotransmission and pharmacological rescue of neuronal hyperexcitability in the amygdala in a mouse model of fragile X syndrome. *J Neurosci* 30: 9929-9938 Doi [10.1523/JNEUROSCI.1714-10.2010](https://doi.org/10.1523/JNEUROSCI.1714-10.2010)

- 65 Pan F, Aldridge GM, Greenough WT, Gan WB (2010) Dendritic spine instability and insensitivity to modulation by sensory experience in a mouse model of fragile X syndrome. *Proc Natl Acad Sci U S A* 107: 17768-17773 Doi [10.1073/pnas.1012496107](https://doi.org/10.1073/pnas.1012496107)
- 66 Peça J, Feliciano C, Ting JT, Wang WT, Wells MF, Venkatraman TN, Lascola CD, Fu ZY, Feng GP (2011) Shank3 mutant mice display autistic-like behaviours and striatal dysfunction. *Nature* 472: 437-442 Doi [10.1038/nature09965](https://doi.org/10.1038/nature09965)
- 67 Pop AS, Levens J, de Esch CE, Buijssen RA, Nieuwenhuizen IM, Li T, Isaacs A, Gasparini F, Oostra BA, Willemsen R (2014) Rescue of dendritic spine phenotype in Fmr1 KO mice with the mGluR5 antagonist AFQ056/Mavoglurant. *Psychopharmacology (Berl)* 231: 1227-1235 Doi [10.1007/s00213-012-2947-y](https://doi.org/10.1007/s00213-012-2947-y)
- 68 Portmann T, Yang M, Mao R, Panagiotakos G, Ellegood J, Dolen G, Bader PL, Grueter BA, Goold C, Fisher E, et al (2014) Behavioral abnormalities and circuit defects in the basal ganglia of a mouse model of 16p11.2 deletion syndrome. *Cell Rep* 7: 1077-1092 Doi [10.1016/j.celrep.2014.03.036](https://doi.org/10.1016/j.celrep.2014.03.036)
- 69 Pucilowska J, Vithayathil J, Tavares EJ, Kelly C, Karlo JC, Landreth GE (2015) The 16p11.2 deletion mouse model of autism exhibits altered cortical progenitor proliferation and brain cytoarchitecture linked to the ERK MAPK pathway. *J Neurosci* 35: 3190-3200 Doi [10.1523/JNEUROSCI.4864-13.2015](https://doi.org/10.1523/JNEUROSCI.4864-13.2015)
- 70 Qin M, Entezam A, Usdin K, Huang T, Liu ZH, Hoffman GE, Smith CB (2011) A mouse model of the fragile X premutation: effects on behavior, dendrite morphology, and regional rates of cerebral protein synthesis. *Neurobiol Dis* 42: 85-98 Doi [10.1016/j.nbd.2011.01.008](https://doi.org/10.1016/j.nbd.2011.01.008)
- 71 Radyushkin K, Hammerschmidt K, Boretius S, Varoqueaux F, El-Kordi A, Ronnenberg A, Winter D, Frahm J, Fischer J, Brose N, et al (2009) Neuroligin-3-deficient mice: model of a monogenic heritable form of autism with an olfactory deficit. *Genes Brain Behav* 8: 416-425 Doi [10.1111/j.1601-183X.2009.00487.x](https://doi.org/10.1111/j.1601-183X.2009.00487.x)
- 72 Reith RM, McKenna J, Wu H, Hashmi SS, Cho SH, Dash PK, Gambello MJ (2013) Loss of Tsc2 in Purkinje cells is associated with autistic-like behavior in a mouse model of tuberous sclerosis complex. *Neurobiol Dis* 51: 93-103 Doi [10.1016/j.nbd.2012.10.014](https://doi.org/10.1016/j.nbd.2012.10.014)
- 73 Rietveld L, Stuss DP, McPhee D, Delaney KR (2015) Genotype-specific effects of Mecp2 loss-of-function on morphology of Layer V pyramidal neurons in heterozygous female Rett syndrome model mice. *Front Cell Neurosci* 9: 145 Doi [10.3389/fncel.2015.00145](https://doi.org/10.3389/fncel.2015.00145)
- 74 Robinson L, Guy J, McKay L, Brockett E, Spike RC, Selfridge J, De Sousa D, Merusi C, Riedel G, Bird A, et al (2012) Morphological and functional reversal of phenotypes in a mouse model of Rett syndrome. *Brain* 135: 2699-2710 Doi [10.1093/brain/aws096](https://doi.org/10.1093/brain/aws096)
- 75 Sato M, Stryker MP (2010) Genomic imprinting of experience-dependent cortical plasticity by the ubiquitin ligase gene Ube3a. *Proc Natl Acad Sci U S A* 107: 5611-5616 Doi [10.1073/pnas.1001281107](https://doi.org/10.1073/pnas.1001281107)
- 76 Sceniak MP, Lang M, Enomoto AC, Howell CJ, Hermes DJ, Katz DM (2016) Mechanisms of functional hypoconnectivity in the medial prefrontal cortex of Mecp2 null mice. *Cereb Cortex* 26: 1938-1956 Doi [10.1093/cercor/bhv002](https://doi.org/10.1093/cercor/bhv002)
- 77 Smrt RD, Eaves-Egenes J, Barkho BZ, Santistevan NJ, Zhao C, Aimone JB, Gage FH, Zhao X (2007) Mecp2 deficiency leads to delayed maturation and altered gene expression in hippocampal neurons. *Neurobiol Dis* 27: 77-89 Doi [10.1016/j.nbd.2007.04.005](https://doi.org/10.1016/j.nbd.2007.04.005)
- 78 Stuss DP, Boyd JD, Levin DB, Delaney KR (2012) MeCP2 mutation results in compartment-specific reductions in dendritic branching and spine density in layer 5 motor cortical neurons of YFP-H mice. *PLoS One* 7: e31896 Doi [10.1371/journal.pone.0031896](https://doi.org/10.1371/journal.pone.0031896)
- 79 Su H, Fan W, Coskun PE, Vesa J, Gold JA, Jiang YH, Potluri P, Procaccio V, Acab A, Weiss JH, et al (2011) Mitochondrial dysfunction in CA1 hippocampal neurons of the UBE3A deficient mouse model for Angelman syndrome. *Neurosci Lett* 487: 129-133 Doi [10.1016/j.neulet.2009.06.079](https://doi.org/10.1016/j.neulet.2009.06.079)
- 80 Tabuchi K, Blundell J, Etherton MR, Hammer RE, Liu X, Powell CM, Südhof TC (2007) A neuroligin-3 mutation implicated in autism increases inhibitory synaptic transmission in mice. *Science* 318: 71-76 Doi [10.1126/science.1146221](https://doi.org/10.1126/science.1146221)
- 81 Tang G, Gudsnuk K, Kuo SH, Cotrina ML, Rosoklija G, Sosunov A, Sonders MS, Kanter E, Castagna C, Yamamoto A, et al (2014) Loss of mTOR-dependent macroautophagy causes autistic-like synaptic pruning deficits. *Neuron* 83: 1131-1143 Doi [10.1016/j.neuron.2014.07.040](https://doi.org/10.1016/j.neuron.2014.07.040)
- 82 Tavazoie SF, Alvarez VA, Ridenour DA, Kwiatkowski DJ, Sabatini BL (2005) Regulation of neuronal morphology and function by the tumor suppressors Tsc1 and Tsc2. *Nat Neurosci* 8: 1727-1734 Doi [10.1038/nn1566](https://doi.org/10.1038/nn1566)
- 83 Till SM, Wijetunge LS, Seidel VG, Harlow E, Wright AK, Bagni C, Contractor A, Gillingwater TH, Kind PC (2012) Altered maturation of the primary somatosensory cortex in a mouse model of fragile X syndrome. *Hum Mol Genet* 21: 2143-2156 Doi [10.1093/hmg/dds030](https://doi.org/10.1093/hmg/dds030)
- 84 Tsai PT, Hull C, Chu Y, Greene-Colozzi E, Sadowski AR, Leech JM, Steinberg J, Crawley JN, Regehr WG, Sahin M (2012) Autistic-like behaviour and cerebellar dysfunction in Purkinje cell Tsc1 mutant mice. *Nature* 488: 647-651 Doi [10.1038/nature11310](https://doi.org/10.1038/nature11310)

- 85 Uppal N, Puri R, Yuk F, Janssen WG, Bozdagi-Gunal O, Harony-Nicolas H, Dickstein DL, Buxbaum JD, Hof PR (2015) Ultrastructural analyses in the hippocampus CA1 field in Shank3-deficient mice. *Mol Autism* 6: 41 Doi [10.1186/s13229-015-0036-x](https://doi.org/10.1186/s13229-015-0036-x)
- 86 Wallace ML, Burette AC, Weinberg RJ, Philpot BD (2012) Maternal loss of Ube3a produces an excitatory/inhibitory imbalance through neuron type-specific synaptic defects. *Neuron* 74: 793-800 Doi [10.1016/j.neuron.2012.03.036](https://doi.org/10.1016/j.neuron.2012.03.036)
- 87 Wang IT, Reyes AR, Zhou Z (2013) Neuronal morphology in MeCP2 mouse models is intrinsically variable and depends on age, cell type, and Mecp2 mutation. *Neurobiol Dis* 58: 3-12 Doi [10.1016/j.nbd.2013.04.020](https://doi.org/10.1016/j.nbd.2013.04.020)
- 88 Wang X, Bey AL, Katz BM, Badea A, Kim N, David LK, Duffney LJ, Kumar S, Mague SD, Hulbert SW, et al (2016) Altered mGluR5-Homer scaffolds and corticostriatal connectivity in a Shank3 complete knockout model of autism. *Nat Commun* 7: 11459 Doi [10.1038/ncomms11459](https://doi.org/10.1038/ncomms11459)
- 89 Wang X, McCoy PA, Rodriguiz RM, Pan Y, Je HS, Roberts AC, Kim CJ, Berrios J, Colvin JS, Bousquet-Moore D, et al (2011) Synaptic dysfunction and abnormal behaviors in mice lacking major isoforms of Shank3. *Hum Mol Genet* 20: 3093-3108 Doi [10.1093/hmg/ddr212](https://doi.org/10.1093/hmg/ddr212)
- 90 Xu B, Hsu PK, Stark KL, Karayiorgou M, Gogos JA (2013) Derepression of a neuronal inhibitor due to miRNA dysregulation in a schizophrenia-related microdeletion. *Cell* 152: 262-275 Doi [10.1016/j.cell.2012.11.052](https://doi.org/10.1016/j.cell.2012.11.052)
- 91 Yasuda S, Sugiura H, Katsurabayashi S, Shimada T, Tanaka H, Takasaki K, Iwasaki K, Kobayashi T, Hino O, Yamagata K (2014) Activation of Rheb, but not of mTORC1, impairs spine synapse morphogenesis in tuberous sclerosis complex. *Sci Rep* 4: 5155 Doi [10.1038/srep05155](https://doi.org/10.1038/srep05155)
- 92 Yi JJ, Berrios J, Newbern JM, Snider WD, Philpot BD, Hahn KM, Zylka MJ (2015) An autism-linked mutation disables phosphorylation control of UBE3A. *Cell* 162: 795-807 Doi [10.1016/j.cell.2015.06.045](https://doi.org/10.1016/j.cell.2015.06.045)

**SUPPLEMENTARY TABLE 2 Summary of clinical features of various ASD subtypes against behavioral phenotypes in genetically modified models**

| ASD gene       | Clinical features                                                                                                                                                                                                                                                            | ASD behavioral phenotypes in animal models                                                                                                                                                                                                                                                                                                                                                                                                                                                                                                                                                                                                                                                                                                                                                                                                                                                                                                                                        | Comorbidities in animal models                                                                                                                                                                                                                                                                                                                                                                                                                                                                                                                                                                                                                                                                                                                                                |
|----------------|------------------------------------------------------------------------------------------------------------------------------------------------------------------------------------------------------------------------------------------------------------------------------|-----------------------------------------------------------------------------------------------------------------------------------------------------------------------------------------------------------------------------------------------------------------------------------------------------------------------------------------------------------------------------------------------------------------------------------------------------------------------------------------------------------------------------------------------------------------------------------------------------------------------------------------------------------------------------------------------------------------------------------------------------------------------------------------------------------------------------------------------------------------------------------------------------------------------------------------------------------------------------------|-------------------------------------------------------------------------------------------------------------------------------------------------------------------------------------------------------------------------------------------------------------------------------------------------------------------------------------------------------------------------------------------------------------------------------------------------------------------------------------------------------------------------------------------------------------------------------------------------------------------------------------------------------------------------------------------------------------------------------------------------------------------------------|
| <i>NLGN3/4</i> | <ul style="list-style-type: none"> <li>• Non-syndromic X-linked ASD</li> <li>• Intellectual disability [52, 70, 91]</li> </ul>                                                                                                                                               | <ul style="list-style-type: none"> <li>• <i>Nlgn3</i> KO mice: normal social interaction in pairs, normal sociability, reduced social novelty preference, decreased ultrasonic vocalizations [114]</li> <li>• <i>Nlgn3</i> KO in striatal neurons expressing dopamine receptor 1, not dopamine receptor 2: repetitive behaviors [120]</li> <li>• <i>Nlgn3</i> KO rats: reduced juvenile social play [61]</li> <li>• <i>Nlgn3</i><sup>R451C</sup> KI mice: (129S2/SvPasCrl background) social interaction deficits [72, 134], repetitive behavior [17]. (C2J background) normal sociability, reduced ultrasonic vocalizations [20]</li> <li>• <i>Nlgn4</i> KO mice: reduced reciprocal social interaction in dyads, very mild difference in sociability, lack of preference for social novelty, reduced juvenile and adult ultrasonic vocalizations and impaired nest-building, increased self-grooming, compulsive marble burying and repetitive circling [43, 71, 76]</li> </ul> | <ul style="list-style-type: none"> <li>• <i>Nlgn3</i> KO mice: no perseveration on the hole-board test, normal spatial learning and inflexibility in the Morris water maze, locomotor hyperactivity in the open field, normal motor performance on the rotarod and normal levels of anxiety [114]</li> <li>• Conditional <i>Nlgn3</i> KO in Purkinje cells: hyperactivity [120]</li> <li>• <i>Nlgn3</i><sup>R451C</sup> mice: (129S2/SvPasCrl background) enhanced cognitive function, [72, 134], increased aggression [17]. (C2J background) developmental delays and impaired motor learning [20]</li> <li>• <i>Nlgn4</i> KO mice: No inflexibility during reversal spatial learning, normal anxiety-like behavior, activity and motor coordination [43, 71, 76]</li> </ul> |
| <i>NRXN1/3</i> | <ul style="list-style-type: none"> <li>• Intellectual disability, developmental delay, language problems, ASD [7, 49, 80, 133]</li> <li>• <i>NRXN1</i>: higher risk for schizophrenia [68]</li> <li>• Seizures, hypotonia and facial dysmorphism [7, 49, 80, 133]</li> </ul> | <ul style="list-style-type: none"> <li>• <i>Nrxn1</i> <math>\alpha</math> KO mice: (129/SvJ x C57BL/6J background) normal social behavior but increased self-grooming and impaired nest building [46]. (C57BL/6J background) enhanced sociability (both genders) and preference for social novelty (females only) in the 3-chamber test [54]</li> <li>• <i>Nrxn2</i> <math>\alpha</math> KO mice: decreased social interactions and increased grooming as well as increased anxiety phenotypes in both the open field and the novel object interaction task [11, 32]</li> </ul>                                                                                                                                                                                                                                                                                                                                                                                                   | <ul style="list-style-type: none"> <li>• <i>Nrxn1</i> <math>\alpha</math> KO mice: (C57BL/6J background) increased aggression with adult and juvenile conspecifics (males only), hypoactivity (females), and anxiety-like behavior (males) [54]</li> </ul>                                                                                                                                                                                                                                                                                                                                                                                                                                                                                                                    |
| <i>CNTNAP2</i> | <ul style="list-style-type: none"> <li>• Intellectual disability and/or ASD [3, 4, 131]</li> </ul>                                                                                                                                                                           | <ul style="list-style-type: none"> <li>• <i>Cntnap2</i> KO mice: reduced communication, decrease in social interaction in the 3-chamber task during reciprocal interactions and in home cage nesting, and elevated repetitive behaviors [111], no changes in social or repetitive behaviors [16]</li> </ul>                                                                                                                                                                                                                                                                                                                                                                                                                                                                                                                                                                                                                                                                       | <ul style="list-style-type: none"> <li>• <i>Cntnap2</i> KO mice: inflexibility during reversal training in the water maze and a reduction of spontaneous alternation in the T-maze, increased hyperactivity [16]</li> <li>• <i>Cntnap2</i> KO rats and mice: severe epileptiform activity [111, 136]</li> </ul>                                                                                                                                                                                                                                                                                                                                                                                                                                                               |

| ASD gene                                            | Clinical features                                                                                                                                                                                                                                                                                                                                                                                                                                                                     | ASD behavioral phenotypes in animal models                                                                                                                                                                                                                                                                                                                                                                                                                                                                                                       | Comorbidities in animal models                                                                                                                                                                                                                                                                                                                                                                                                                                                                                     |
|-----------------------------------------------------|---------------------------------------------------------------------------------------------------------------------------------------------------------------------------------------------------------------------------------------------------------------------------------------------------------------------------------------------------------------------------------------------------------------------------------------------------------------------------------------|--------------------------------------------------------------------------------------------------------------------------------------------------------------------------------------------------------------------------------------------------------------------------------------------------------------------------------------------------------------------------------------------------------------------------------------------------------------------------------------------------------------------------------------------------|--------------------------------------------------------------------------------------------------------------------------------------------------------------------------------------------------------------------------------------------------------------------------------------------------------------------------------------------------------------------------------------------------------------------------------------------------------------------------------------------------------------------|
| <i>SHANK3</i>                                       | <ul style="list-style-type: none"> <li>• ASD [40]</li> <li>• Phelan-McDermid syndrome [63], showing global developmental delay, intellectual disability, delay or absence of speech, and ASD, as well as low motor tone and minor dysmorphic features [112, 145]</li> </ul>                                                                                                                                                                                                           | <p><i>Shank3</i>-deficient mice:</p> <ul style="list-style-type: none"> <li>• Stereotypies, notably abnormally elevated levels of self-grooming [28, 62, 73, 74, 84, 110, 140-142, 149], mild deficits in social approach and/or reciprocal interactions [73, 84, 110, 141, 142, 149], abnormal ultrasonic vocalizations [12, 110, 141, 142, 149]</li> <li>• Genetic background does not appear to have a major impact on ASD behaviors in <i>Shank3</i>-deficient rodent models [37]</li> </ul>                                                 | <p><i>Shank3</i>-deficient mice:</p> <ul style="list-style-type: none"> <li>• Motor deficits and learning delays reminiscent of those seen in Phelan-McDermid syndrome [13, 73, 84, 92, 99, 110, 140-142, 149]</li> <li>• Decreased attention [28, 64]</li> </ul> <p><i>Shank3</i>-deficient rat:</p> <ul style="list-style-type: none"> <li>• Decreased attention [28, 64]</li> </ul>                                                                                                                             |
| <p><i>MECP2</i></p> <p><i>MECP2</i> duplication</p> | <ul style="list-style-type: none"> <li>• Primarily affects females [2, 118]</li> <li>• Developmental regression at 6-18 months, loss of sensory, motor and cognitive functions</li> <li>• &lt; 60% meet ASD criteria [119], with repetitive hand movements, social withdrawal and loss of verbal communication</li> <li>• Males with <i>MECP2</i> duplications have a syndromic manifestation including intellectual disability, language deficits, anxiety, and ASD [115]</li> </ul> | <ul style="list-style-type: none"> <li>• Conditional mutations in mice: impaired social behavior [22, 51, 57, 90, 94, 122]</li> <li>• Mice overexpressing <i>Mecp2</i> (<i>Mecp2<sup>Tg1</sup></i>): social interaction deficits [121]</li> <li>• Marmoset monkey model of <i>MECP2</i> duplication: deficits of social interaction (more pronounced in males), stereotypical behavior [5, 93]</li> </ul>                                                                                                                                        | <ul style="list-style-type: none"> <li>• Constitutive <i>Mecp2</i> deletion in mice: embryonic lethality</li> <li>• Conditional mutations in mice: Stiff and uncoordinated gait, hind-limb claspings, seizures, breathing irregularities, deficits in learning and memory, and reduced anxiety [22, 51, 57, 90, 94, 122].</li> <li>• Mice overexpressing <i>Mecp2</i> (<i>Mecp2<sup>Tg1</sup></i>): enhanced learning [26]</li> </ul>                                                                              |
| <i>FMR1</i>                                         | <ul style="list-style-type: none"> <li>• Intellectual disability, delayed speech, anxiety, attention deficit disorder and hyperactivity, seizure and body dysmorphism [24]</li> <li>• ~22% of all carriers and 30% of males with <i>FMR1</i> mutations meet ASD criteria [58, 119]</li> </ul>                                                                                                                                                                                         | <p><i>Fmr1</i> KO mice:</p> <ul style="list-style-type: none"> <li>• ASD-related behaviors including abnormal sociability and social recognition, deficit in the establishment of social dominance, decrease of ultrasonic vocalizations and repetitive behaviors [48, 97, 128]</li> <li>• Degree of behaviors strongly affected by the genetic background [127]</li> </ul> <p><i>Fmr1</i> KO rats</p> <ul style="list-style-type: none"> <li>• Low levels of social play behavior and high levels of a repetitive block chewing [61]</li> </ul> | <p><i>Fmr1</i> KO mice:</p> <ul style="list-style-type: none"> <li>• Score poorly in learning and memory tasks, impaired spatial working memory [139, 148], impaired reversal learning and increased perseverance in both spatial navigation tasks and touch-screen visual discrimination [31, 35], impaired contextual fear memory [36, 55]</li> <li>• Comorbid behaviors such as hyperactivity, impulsivity and perseverance [86], prone to seizures [21]</li> <li>• Low anxiety-like behaviors [128]</li> </ul> |

| ASD gene      | Clinical features                                                                                                                                                                                                                                                                                 | ASD behavioral phenotypes in animal models                                                                                                                                                                                                                                                                                                                                                                                                                                                                                                                                                                                                                                       | Comorbidities in animal models                                                                                                                                                                                                                                                                                                                                                                                                                                                                                                                                                                                                                                                                                                                                                                                                                                   |
|---------------|---------------------------------------------------------------------------------------------------------------------------------------------------------------------------------------------------------------------------------------------------------------------------------------------------|----------------------------------------------------------------------------------------------------------------------------------------------------------------------------------------------------------------------------------------------------------------------------------------------------------------------------------------------------------------------------------------------------------------------------------------------------------------------------------------------------------------------------------------------------------------------------------------------------------------------------------------------------------------------------------|------------------------------------------------------------------------------------------------------------------------------------------------------------------------------------------------------------------------------------------------------------------------------------------------------------------------------------------------------------------------------------------------------------------------------------------------------------------------------------------------------------------------------------------------------------------------------------------------------------------------------------------------------------------------------------------------------------------------------------------------------------------------------------------------------------------------------------------------------------------|
| <i>TSC1/2</i> | <ul style="list-style-type: none"> <li>• Benign tumors (tubers) in brain and kidneys, increased risk for malignant tumors</li> <li>• Seizures, intellectual disability and ASD [18]</li> <li>• ASD in 36% carriers of <i>TSC</i> mutations [119]</li> </ul>                                       | <ul style="list-style-type: none"> <li>• <i>Tsc1</i><sup>+/-</sup> mice: significantly reduced social approach and nest building behavior [53, 124, 137]</li> <li>• <i>Tsc2</i><sup>+/-</sup> mice: reduced sociability and reduced preference for social novelty, reduced dyadic reciprocal interaction in pairs and abnormal mother-pup interaction, reflected by altered ultrasound vocalization [116, 124, 150]</li> <li>• Cerebellar KO of <i>Tsc1</i>: impaired social interaction, increased grooming and higher ultrasonic vocalizations [137]</li> <li>• <i>Tsc2</i> KO in Purkinje cells: increased repetitive behaviors and impaired social behavior [116]</li> </ul> | <ul style="list-style-type: none"> <li>• <i>Tsc1</i> or <i>Tsc2</i> KO in mice: lethal, with severe neurological abnormalities and seizures beginning at postnatal day 5 and a median age of 35 days [89, 100]</li> <li>• <i>Tsc1</i><sup>+/-</sup> mice: impaired in hippocampus-dependent versions of both spatial and fear-conditioned tests of learning and memory [53, 124, 137]</li> <li>• <i>Tsc2</i><sup>+/-</sup> mice: impaired spatial learning and memory and contextual fear conditioning [42, 124]</li> <li>• <i>Tsc1</i><sup>+/-</sup> and <i>Tsc2</i><sup>+/-</sup> mice: no seizures, or the brain anatomic abnormalities characteristic of TSC in human [53]</li> <li>• Cerebellar KO of <i>Tsc1</i>: deficits in reversal learning [137]</li> <li>• <i>Tsc2</i> KO in Purkinje cells: progressive Purkinje cell degeneration [116]</li> </ul> |
| <i>CHD8</i>   | <ul style="list-style-type: none"> <li>• High-penetrance ASD risk gene [33, 69, 107, 135]</li> <li>• Also a risk gene for schizophrenia [81]</li> <li>• Global developmental delay, macrocephaly, ASD, facial dysmorphism, sleep disturbances, gastrointestinal problems [9, 130, 151]</li> </ul> | <ul style="list-style-type: none"> <li>• <i>Chd8</i>-deficient mice: social deficits [39, 78, 113], but not repetitive behaviors [113]</li> </ul>                                                                                                                                                                                                                                                                                                                                                                                                                                                                                                                                | <ul style="list-style-type: none"> <li>• Knock-down of the <i>CHD8</i> ortholog: macrocephaly and decreased gut mobility in zebrafish [9, 132], increased brain weight and volume [78, 113] and decreased gut length [78] in mice</li> <li>• <i>Chd8</i>-deficient mice: anxiety [78, 113], persistent behavior during learning [78], and an absence of learning deficits [39, 113]</li> </ul>                                                                                                                                                                                                                                                                                                                                                                                                                                                                   |
| <i>SCN2A</i>  | <ul style="list-style-type: none"> <li>• Infantile seizures, epileptic encephalopathy, epileptic syndromes (reviewed in [146])</li> <li>• Intellectual disability and ASD without epilepsy [33, 69, 143]</li> </ul>                                                                               | <ul style="list-style-type: none"> <li>• Mice expressing adult <i>Scn2a</i> isoform: social behavior was normal [50]</li> <li>• Mice with <i>Scn2a</i> GAL879-881QQQ mutation: repetitive behaviors [79]</li> </ul>                                                                                                                                                                                                                                                                                                                                                                                                                                                              | <ul style="list-style-type: none"> <li>• Mice expressing adult <i>Scn2a</i> isoform: no spontaneous seizures but increased susceptibility to proconvulsant-induced seizures, reduced anxiety and increased risk-taking behavior [50]</li> <li>• Mice with <i>Scn2a</i> GAL879-881QQQ mutation: spontaneous and handling-induced seizures [79]</li> </ul>                                                                                                                                                                                                                                                                                                                                                                                                                                                                                                         |

| ASD gene                   | Clinical features                                                                                                                                                                                                                                                                                                          | ASD behavioral phenotypes in animal models                                                                                                                   | Comorbidities in animal models                                                                                                                                                                                                                                                                                                                                                                                                                                                                                                                                         |
|----------------------------|----------------------------------------------------------------------------------------------------------------------------------------------------------------------------------------------------------------------------------------------------------------------------------------------------------------------------|--------------------------------------------------------------------------------------------------------------------------------------------------------------|------------------------------------------------------------------------------------------------------------------------------------------------------------------------------------------------------------------------------------------------------------------------------------------------------------------------------------------------------------------------------------------------------------------------------------------------------------------------------------------------------------------------------------------------------------------------|
| <i>SYNGAP1</i>             | <ul style="list-style-type: none"> <li>• Several neurodevelopmental disorders, including non-syndromic intellectual disability in 100% of carriers and ASD in 50% of carriers [33, 60, 69]</li> <li>• Encephalopathy, epilepsy, hypotonia, stereotypical behaviors and aggression (reviewed in [101])</li> </ul>           | <p><i>Syngap1</i>-deficient mice:</p> <ul style="list-style-type: none"> <li>• Increased stereotypical behaviors, increased social isolation [56]</li> </ul> | <p><i>Syngap1</i>-deficient mice:</p> <ul style="list-style-type: none"> <li>• Reduced social memory, hyperactive, greater risk-taking behavior, increased startle reaction, and reduced pre-pulse inhibition [56], improved long-term memory [1], poor performance on amygdala-dependent cued fear conditioning and working memory [56] and dentate gyrus-driven learning [25]</li> <li>• Susceptible to seizures and show abnormalities on electroencephalogram recording [56]</li> </ul>                                                                            |
| <i>ARID1B (or BAF250B)</i> | <ul style="list-style-type: none"> <li>• Coffin-Siris syndrome</li> <li>• Developmental delay, hypotonia, feeding problems, and physical features such as anomalous nails or shorter fingers, hirsutism, sparse scalp hair and facial dysmorphism (reviewed in [123])</li> <li>• ASD [30, 33, 59, 69, 106, 138]</li> </ul> | Behavioral testing not reported yet.                                                                                                                         |                                                                                                                                                                                                                                                                                                                                                                                                                                                                                                                                                                        |
| <i>GRIN2B</i>              | <ul style="list-style-type: none"> <li>• Neurodevelopmental disorders, including epileptic encephalopathy, intellectual disability and ASD [33, 44, 45, 69]</li> </ul>                                                                                                                                                     | ASD phenotypes not tested.                                                                                                                                   | <ul style="list-style-type: none"> <li>• <i>Grin2b</i> full KO mice: no suckling response and therefore die shortly after birth [88]</li> <li>• Cortical and hippocampal CA1 <i>Grin2b</i> KO mice: impaired performance on the Morris water maze, T-maze spontaneous alternation, and Pavlovian trace fear conditioning tests [15]</li> <li>• Corticostriatal or striatal <i>Grin2b</i> KO mice: impairment in choice learning [14]</li> <li>• Cortical <i>Grin2b</i> KO mice: impaired shifting in pairwise visual discrimination and reversal tests [14]</li> </ul> |
| <i>DSCAM</i>               | <ul style="list-style-type: none"> <li>• ASD risk gene [33, 69]</li> </ul>                                                                                                                                                                                                                                                 | ASD phenotypes not tested.                                                                                                                                   | <ul style="list-style-type: none"> <li>• <i>Dscam</i><sup>del17</sup> mutant mice: decreased motor function, impaired motor learning ability [147]</li> </ul>                                                                                                                                                                                                                                                                                                                                                                                                          |
| <i>TBR1</i>                | <ul style="list-style-type: none"> <li>• Intellectual disability and ASD [33, 34, 104, 107]</li> </ul>                                                                                                                                                                                                                     | <ul style="list-style-type: none"> <li>• <i>Tbr1</i><sup>+/-</sup> mice: social deficits, and reduced ultrasonic vocalization [67].</li> </ul>               | <ul style="list-style-type: none"> <li>• <i>Tbr1</i><sup>+/-</sup> mice: impaired associative memory and cognitive flexibility [67].</li> </ul>                                                                                                                                                                                                                                                                                                                                                                                                                        |

| ASD gene                                              | Clinical features                                                                                                                                                                                                                                                                                                                                                                                                                                                                                                                                                                                                                                                                                                                                                                                                                                                                                                                                                                                                                                                                                                                                                                                                                                   | ASD behavioral phenotypes in animal models                                                                                                                                                                 | Comorbidities in animal models                                                                                                                                                                                                                                                                                                                                                                                                                                                                                                                                                                                                                                                                                                                                                                                                                                                                                                                                                                  |
|-------------------------------------------------------|-----------------------------------------------------------------------------------------------------------------------------------------------------------------------------------------------------------------------------------------------------------------------------------------------------------------------------------------------------------------------------------------------------------------------------------------------------------------------------------------------------------------------------------------------------------------------------------------------------------------------------------------------------------------------------------------------------------------------------------------------------------------------------------------------------------------------------------------------------------------------------------------------------------------------------------------------------------------------------------------------------------------------------------------------------------------------------------------------------------------------------------------------------------------------------------------------------------------------------------------------------|------------------------------------------------------------------------------------------------------------------------------------------------------------------------------------------------------------|-------------------------------------------------------------------------------------------------------------------------------------------------------------------------------------------------------------------------------------------------------------------------------------------------------------------------------------------------------------------------------------------------------------------------------------------------------------------------------------------------------------------------------------------------------------------------------------------------------------------------------------------------------------------------------------------------------------------------------------------------------------------------------------------------------------------------------------------------------------------------------------------------------------------------------------------------------------------------------------------------|
| <p>15q11-q13 deletions and 15q13.3 microdeletions</p> | <p>Angelman syndrome: <i>de novo</i> deletions on the maternal copy, paternal uniparental disomy, or defective imprinting on chromosome 15q11.2-q13 or <i>UBE3A</i> mutations [82]</p> <ul style="list-style-type: none"> <li>• Developmental delay at 6 to 12 months of age. Ataxia or tremor, speech and motor deficits, inappropriate happiness with hand flapping, seizures, microcephaly, hypotonia, misaligned eyes, drooling, protruding tongue, disturbed sleep and anxiety [77, 95]</li> <li>• ASD in 34% cases [82]</li> </ul> <p>Prader-Willi syndrome: deletion, uniparental disomy, or an imprinting center defect on the paternal chromosome 15q11.2-q13 [23, 38]</p> <ul style="list-style-type: none"> <li>• Extremely low motor tone</li> <li>• Difficulty in feeding during infancy, uncontrolled eating and development of obesity in early childhood</li> <li>• Cognitive impairment</li> <li>• ASD in ~25% cases [8], with social deficits and increased repetitive and ritualistic behaviors [19, 77]</li> </ul> <p>15q13.3 microdeletion:</p> <ul style="list-style-type: none"> <li>• Increased risk for ASD, intellectual disability and other disorders including schizophrenia and epilepsy [6, 68, 108, 125]</li> </ul> | <p>Microdeletion model:</p> <ul style="list-style-type: none"> <li>• Heterozygous deletion D/+ mice: deficits in social interaction, increased grooming and fewer ultrasonic vocalizations [83]</li> </ul> | <p>Angelman syndrome model:</p> <ul style="list-style-type: none"> <li>• Mice with maternal <i>Ube3a</i> deletions (<i>Ube3amKO</i>): decreased motor coordination, susceptibility to audiogenic seizures, and impaired learning and memory [66, 75, 102, 126], severity of those behaviors varies with genetic background and age [66]</li> </ul> <p>Prader-Willi models:</p> <ul style="list-style-type: none"> <li>• Mice with paternal deletion: lethal [47], small, weak, and feed poorly (reviewed in [10])</li> <li>• <i>Snrpn</i> mutant mice: decreased locomotor activity and impaired attention functioning in the five-choice serial reaction time task, normal fear reactivity [117]</li> <li>• <i>Magel2</i>-null mice: increased anxiety in response to new stimuli, intact learning and memory capacities [85]</li> </ul> <p>Microdeletion model:</p> <ul style="list-style-type: none"> <li>• Heterozygous deletion D/+ mice: normal cognition and no seizures [83]</li> </ul> |

| ASD gene                                       | Clinical features                                                                                                                                                                                                                                                                                                                                                                                                                              | ASD behavioral phenotypes in animal models                                                                                                                                                                                                                                                                                                                                                                                                                                       | Comorbidities in animal models                                                                                                                                                                                                                                                                                                                                          |
|------------------------------------------------|------------------------------------------------------------------------------------------------------------------------------------------------------------------------------------------------------------------------------------------------------------------------------------------------------------------------------------------------------------------------------------------------------------------------------------------------|----------------------------------------------------------------------------------------------------------------------------------------------------------------------------------------------------------------------------------------------------------------------------------------------------------------------------------------------------------------------------------------------------------------------------------------------------------------------------------|-------------------------------------------------------------------------------------------------------------------------------------------------------------------------------------------------------------------------------------------------------------------------------------------------------------------------------------------------------------------------|
| 15q11-13 duplication, often of maternal origin | <ul style="list-style-type: none"> <li>• Neurodevelopmental and neurological phenotypes with features of both Prader-Willi syndrome and Angelman syndrome</li> <li>• Hypotonia, speech disorder, developmental delay, seizures and ASD [27]</li> </ul>                                                                                                                                                                                         | <ul style="list-style-type: none"> <li>• Mice with maternally derived duplication (<i>matDp/+</i>): no impairment on ASD-associated behaviors [103]</li> <li>• Mice with paternally derived duplication (<i>patDp/+</i>): reduced sociability, abnormal ultrasound vocalization [103]</li> <li>• Mice with triplication of <i>Ube3a</i>: decreased sociability, reduction of ultrasonic vocalizations and repetitive self-grooming [126]</li> </ul>                              | <ul style="list-style-type: none"> <li>• Mice with paternally derived duplication (<i>patDp/+</i>): behavioral inflexibility, increased anxiety [103]</li> </ul>                                                                                                                                                                                                        |
| 16p11.2 deletions and duplications             | <ul style="list-style-type: none"> <li>• ASD, schizophrenia and other neurodevelopmental manifestations [87, 96, 144]</li> <li>• Speech and language delays, cognitive impairment and facial dysmorphism</li> <li>• ASD in 16% of subjects with deletion and 20% of those with duplication [29]</li> </ul>                                                                                                                                     | <ul style="list-style-type: none"> <li>• Mice carrying a deletion, Df(7)16, or the reciprocal duplication, Dp(7)16: only mild ASD-like behaviors, more severe phenotype in deletion compared to duplication model [65]</li> <li>• Df(7)16 mice: normal sociability and preference for social novelty, prominent stereotypies in climbing behaviors [65]</li> <li>• Dp(7)16 mice: normal sociability and preference for social novelty, no prominent stereotypies [65]</li> </ul> | <ul style="list-style-type: none"> <li>• Df(7)16 mice: impaired post-natal survival, novelty-induced hyperactivity [65]</li> <li>• Dp(7)16 mice: no viability problems, hypoactivity in a modified home cage environment [65]</li> </ul>                                                                                                                                |
| 22q11.2 deletion syndrome                      | <ul style="list-style-type: none"> <li>• Velocardial facial or DiGeorge syndrome</li> <li>• Congenital or late-onset features including mild dysmorphism, inability to seal the nasopharynx, heart defects, and impaired cognition</li> <li>• High risk for neuropsychiatric disorders, including attention deficit hyperactivity disorder, schizophrenia, intellectual disability and ASD [105]</li> <li>• ASD in ~11% cases [119]</li> </ul> | Social behavior has not been reported yet.                                                                                                                                                                                                                                                                                                                                                                                                                                       | <ul style="list-style-type: none"> <li>• 22q11.2DS mice: Learning and memory deficits, including impaired spatial learning in the T-maze or the water maze [41, 129], impaired fear conditioning [109, 129], improved early-phase reversal learning, impaired late-phase and overall touchscreen reversal learning, impaired discrimination performance [98]</li> </ul> |

Clinical features observed in patients are compared to the behavioral phenotype of animal models carrying various ASD risk genes.

## References:

- 1 Aceti M, Creson TK, Vaissiere T, Rojas C, Huang WC, Wang YX, Petralia RS, Page DT, Miller CA, Rumbaugh G (2015) Syngap1 haploinsufficiency damages a postnatal critical period of pyramidal cell structural maturation linked to cortical circuit assembly. *Biol Psychiatry* 77: 805-815 Doi [10.1016/j.biopsych.2014.08.001](https://doi.org/10.1016/j.biopsych.2014.08.001)
- 2 Amir RE, Van den Veyver IB, Wan M, Tran CQ, Francke U, Zoghbi HY (1999) Rett syndrome is caused by mutations in X-linked MECP2, encoding methyl-CpG-binding protein 2. *Nat Genet* 23: 185-188 Doi [10.1038/13810](https://doi.org/10.1038/13810)
- 3 Arking DE, Cutler DJ, Brune CW, Teslovich TM, West K, Ikeda M, Rea A, Guy M, Lin S, Cook EH, et al (2008) A common genetic variant in the neurexin superfamily member CNTNAP2 increases familial risk of autism. *Am J Hum Genet* 82: 160-164 Doi [10.1016/j.ajhg.2007.09.015](https://doi.org/10.1016/j.ajhg.2007.09.015)
- 4 Bakkaloglu B, O'Roak BJ, Louvi A, Gupta AR, Abelson JF, Morgan TM, Chawarska K, Klin A, Ercan-Sencicek AG, Stillman AA, et al (2008) Molecular cytogenetic analysis and resequencing of contactin associated protein-like 2 in autism spectrum disorders. *Am J Hum Genet* 82: 165-173 Doi [10.1016/j.ajhg.2007.09.017](https://doi.org/10.1016/j.ajhg.2007.09.017)
- 5 Bauman MD, Schumann CS (In press) Advances in nonhuman primate models of autism: integrating neuroscience and behavior. *Exp Neurol*:
- 6 Ben-Shachar S, Lanpher B, German JR, Qasaymeh M, Potocki L, Nagamani SC, Franco LM, Malphrus A, Bottenfield GW, Spence JE, et al (2009) Microdeletion 15q13.3: a locus with incomplete penetrance for autism, mental retardation, and psychiatric disorders. *J Med Genet* 46: 382-388 Doi [10.1136/jmg.2008.064378](https://doi.org/10.1136/jmg.2008.064378)
- 7 Bena F, Bruno DL, Eriksson M, van Ravenswaaij-Arts C, Stark Z, Dijkhuizen T, Gerkes E, Gimelli S, Ganesamoorthy D, Thuresson AC, et al (2013) Molecular and clinical characterization of 25 individuals with exonic deletions of NRXN1 and comprehensive review of the literature. *Am J Med Genet B Neuropsychiatr Genet* 162B: 388-403 Doi [10.1002/ajmg.b.32148](https://doi.org/10.1002/ajmg.b.32148)
- 8 Bennett JA, Germani T, Haqq AM, Zwaigenbaum L (2015) Autism spectrum disorder in Prader-Willi syndrome: A systematic review. *Am J Med Genet A* 167A: 2936-2944 Doi [10.1002/ajmg.a.37286](https://doi.org/10.1002/ajmg.a.37286)
- 9 Bernier R, Golzio C, Xiong B, Stessman HA, Coe BP, Penn O, Witherspoon K, Gerds J, Baker C, Vulto-van Silfhout AT, et al (2014) Disruptive CHD8 mutations define a subtype of autism early in development. *Cell* 158: 263-276 Doi [10.1016/j.cell.2014.06.017](https://doi.org/10.1016/j.cell.2014.06.017)
- 10 Bervini S, Herzog H (2013) Mouse models of Prader-Willi syndrome: a systematic review. *Front Neuroendocrinol* 34: 107-119 Doi [10.1016/j.yfrne.2013.01.002](https://doi.org/10.1016/j.yfrne.2013.01.002)
- 11 Born G, Grayton HM, Langhorst H, Dudanova I, Rohlmann A, Woodward BW, Collier DA, Fernandes C, Missler M (2015) Genetic targeting of NRXN2 in mice unveils role in excitatory cortical synapse function and social behaviors. *Front Synaptic Neurosci* 7: 3 Doi [10.3389/fnsyn.2015.00003](https://doi.org/10.3389/fnsyn.2015.00003)
- 12 Bozdagi O, Sakurai T, Papapetrou D, Wang XB, Dickstein DL, Takahashi N, Kajiwara Y, Yang M, Katz AM, Scattoni ML, et al (2010) Haploinsufficiency of the autism-associated Shank3 gene leads to deficits in synaptic function, social interaction, and social communication. *Mol Autism* 1: Doi [10.1186/2040-2392-1-15](https://doi.org/10.1186/2040-2392-1-15)
- 13 Bozdagi O, Tavassoli T, Buxbaum JD (2013) Insulin-like growth factor-1 rescues synaptic and motor deficits in a mouse model of autism and developmental delay. *Mol Autism* 4: 9 Doi [10.1186/2040-2392-4-9](https://doi.org/10.1186/2040-2392-4-9)
- 14 Brigman JL, Daut RA, Wright T, Gunduz-Cinar O, Graybeal C, Davis MI, Jiang Z, Saksida LM, Jinde S, Pease M, et al (2013) GluN2B in corticostriatal circuits governs choice learning and choice shifting. *Nat Neurosci* 16: 1101-1110 Doi [10.1038/nn.3457](https://doi.org/10.1038/nn.3457)
- 15 Brigman JL, Wright T, Talani G, Prasad-Mulcare S, Jinde S, Seabold GK, Mathur P, Davis MI, Bock R, Gustin RM, et al (2010) Loss of GluN2B-containing NMDA receptors in CA1 hippocampus and cortex impairs long-term depression, reduces dendritic spine density, and disrupts learning. *J Neurosci* 30: 4590-4600 Doi [10.1523/JNEUROSCI.0640-10.2010](https://doi.org/10.1523/JNEUROSCI.0640-10.2010)
- 16 Brunner D, Kabitzke P, He D, Cox K, Thiede L, Hania T, Sabath E, Alexandrov V, Saxe M, Peles E, et al (2015) Comprehensive analysis of the 16p11.2 deletion and null Cntnap2 mouse models of autism spectrum disorder. *PLoS One* 10: e0134572 Doi [10.1371/journal.pone.0134572](https://doi.org/10.1371/journal.pone.0134572)
- 17 Burrows EL, Laskaris L, Koyama L, Churilov L, Bornstein JC, Hill-Yardin EL, Hannan AJ (2015) A neuroligin-3 mutation implicated in autism causes abnormal aggression and increases repetitive behavior in mice. *Mol Autism* 6: 62 Doi [10.1186/s13229-015-0055-7](https://doi.org/10.1186/s13229-015-0055-7)
- 18 Caban C, Khan N, Hasbani DM, Crino PB (2017) Genetics of tuberous sclerosis complex: implications for clinical practice. *Appl Clin Genet* 10: 1-8 Doi [10.2147/TACG.S90262](https://doi.org/10.2147/TACG.S90262)

- 19 Cassidy SB, Driscoll DJ (2009) Prader-Willi syndrome. *Eur J Hum Genet* 17: 3-13 Doi [10.1038/ejhg.2008.165](https://doi.org/10.1038/ejhg.2008.165)
- 20 Chadman KK, Gong S, Scattoni ML, Boltuck SE, Gandhi SU, Heintz N, Crawley JN (2008) Minimal aberrant behavioral phenotypes of neuroligin-3 R451C knockin mice. *Autism Res* 1: 147-158 Doi [10.1002/aur.22](https://doi.org/10.1002/aur.22)
- 21 Chen L, Toth M (2001) Fragile X mice develop sensory hyperreactivity to auditory stimuli. *Neuroscience* 103: 1043-1050
- 22 Chen RZ, Akbarian S, Tudor M, Jaenisch R (2001) Deficiency of methyl-CpG binding protein-2 in CNS neurons results in a Rett-like phenotype in mice. *Nat Genet* 27: 327-331 Doi [10.1038/85906](https://doi.org/10.1038/85906)
- 23 Cheon CK (2016) Genetics of Prader-Willi syndrome and Prader-Willi-Like syndrome. *Ann Pediatr Endocrinol Metab* 21: 126-135 Doi [10.6065/apem.2016.21.3.126](https://doi.org/10.6065/apem.2016.21.3.126)
- 24 Ciaccio C, Fontana L, Milani D, Tabano S, Miozzo M, Esposito S (2017) Fragile X syndrome: a review of clinical and molecular diagnoses. *Ital J Pediatr* 43: 39 Doi [10.1186/s13052-017-0355-y](https://doi.org/10.1186/s13052-017-0355-y)
- 25 Clement JP, Aceti M, Creson TK, Ozkan ED, Shi Y, Reish NJ, Almonte AG, Miller BH, Wiltgen BJ, Miller CA, et al (2012) Pathogenic SYNGAP1 mutations impair cognitive development by disrupting maturation of dendritic spine synapses. *Cell* 151: 709-723 Doi [10.1016/j.cell.2012.08.045](https://doi.org/10.1016/j.cell.2012.08.045)
- 26 Collins AL, Levenson JM, Vilaythong AP, Richman R, Armstrong DL, Noebels JL, David Sweatt J, Zoghbi HY (2004) Mild overexpression of MeCP2 causes a progressive neurological disorder in mice. *Hum Mol Genet* 13: 2679-2689 Doi [10.1093/hmg/ddh282](https://doi.org/10.1093/hmg/ddh282)
- 27 Cook EH, Jr., Lindgren V, Leventhal BL, Courchesne R, Lincoln A, Shulman C, Lord C, Courchesne E (1997) Autism or atypical autism in maternally but not paternally derived proximal 15q duplication. *Am J Hum Genet* 60: 928-934
- 28 Copping NA, Berg EL, Foley GM, Schaffler MD, Onaga BL, Buscher N, Silverman JL, Yang M (2017) Touchscreen learning deficits and normal social approach behavior in the Shank3B model of Phelan-McDermid syndrome and autism. *Neuroscience* 345: 155-165 Doi [10.1016/j.neuroscience.2016.05.016](https://doi.org/10.1016/j.neuroscience.2016.05.016)
- 29 D'Angelo D, Lebon S, Chen Q, Martin-Brevet S, Snyder LG, Hippolyte L, Hanson E, Maillard AM, Faucett WA, Mace A, et al (2016) Defining the Effect of the 16p11.2 Duplication on Cognition, Behavior, and Medical Comorbidities. *JAMA Psychiatry* 73: 20-30 Doi [10.1001/jamapsychiatry.2015.2123](https://doi.org/10.1001/jamapsychiatry.2015.2123)
- 30 D'Gama AM, Pochareddy S, Li M, Jamuar SS, Reiff RE, Lam AT, Sestan N, Walsh CA (2015) Targeted DNA Sequencing from Autism Spectrum Disorder Brains Implicates Multiple Genetic Mechanisms. *Neuron* 88: 910-917 Doi [10.1016/j.neuron.2015.11.009](https://doi.org/10.1016/j.neuron.2015.11.009)
- 31 D'Hooge R, Nagels G, Franck F, Bakker CE, Reyniers E, Storm K, Kooy RF, Oostra BA, Willems PJ, De Deyn PP (1997) Mildly impaired water maze performance in male Fmr1 knockout mice. *Neuroscience* 76: 367-376
- 32 Dachtler J, Glasper J, Cohen RN, Ivorra JL, Swiffen DJ, Jackson AJ, Harte MK, Rodgers RJ, Clapcote SJ (2014) Deletion of alpha-neurexin II results in autism-related behaviors in mice. *Transl Psychiatry* 4: e484 Doi [10.1038/tp.2014.123](https://doi.org/10.1038/tp.2014.123)
- 33 De Rubeis S, He X, Goldberg AP, Poultney CS, Samocha K, Cicek AE, Kou Y, Liu L, Fromer M, Walker S, et al (2014) Synaptic, transcriptional and chromatin genes disrupted in autism. *Nature* 515: 209-215 Doi [10.1038/nature13772](https://doi.org/10.1038/nature13772)
- 34 Deriziotis P, O'Roak BJ, Graham SA, Estruch SB, Dimitropoulou D, Bernier RA, Gerds J, Shendure J, Eichler EE, Fisher SE (2014) De novo TBR1 mutations in sporadic autism disrupt protein functions. *Nat Commun* 5: 4954 Doi [10.1038/ncomms5954](https://doi.org/10.1038/ncomms5954)
- 35 Dickson PE, Corkill B, McKimm E, Miller MM, Calton MA, Goldowitz D, Blaha CD, Mittleman G (2013) Effects of stimulus salience on touchscreen serial reversal learning in a mouse model of fragile X syndrome. *Behav Brain Res* 252: 126-135 Doi [10.1016/j.bbr.2013.05.060](https://doi.org/10.1016/j.bbr.2013.05.060)
- 36 Ding Q, Sethna F, Wang H (2014) Behavioral analysis of male and female Fmr1 knockout mice on C57BL/6 background. *Behav Brain Res* 271: 72-78 Doi [10.1016/j.bbr.2014.05.046](https://doi.org/10.1016/j.bbr.2014.05.046)
- 37 Drapeau E, Dorr NP, Elder GA, Buxbaum JD (2014) Absence of strong strain effects in behavioral analyses of Shank3-deficient mice. *Dis Model Mech* 7: 667-681 Doi [10.1242/dmm.013821](https://doi.org/10.1242/dmm.013821)
- 38 Driscoll DJ, Miller JL, Schwartz S, Cassidy SB (1993) Prader-Willi syndrome. In: Pagon RA, Adam MP, Ardinger HH, Wallace SE, Amemiya A, Bean LJH, Bird TD, Ledbetter N, Mefford HC, Smith RJH, et al (eds) *GeneReviews*(R), Seattle (WA)
- 39 Durak O, Gao F, Kaeser-Woo YJ, Rueda R, Martorell AJ, Nott A, Liu CY, Watson LA, Tsai LH (2016) Chd8 mediates cortical neurogenesis via transcriptional regulation of cell cycle and Wnt signaling. *Nat Neurosci* 19: 1477-1488 Doi [10.1038/nn.4400](https://doi.org/10.1038/nn.4400)
- 40 Durand CM, Betancur C, Boeckers TM, Bockmann J, Chaste P, Fauchereau F, Nygren G, Rastam M, Gillberg IC, Anckarsater H, et al (2007) Mutations in the gene encoding the synaptic scaffolding protein SHANK3 are associated with autism spectrum disorders. *Nat Genet* 39: 25-27 Doi [10.1038/ng1933](https://doi.org/10.1038/ng1933)

- 41 Earls LR, Bayazitov IT, Fricke RG, Berry RB, Illingworth E, Mittleman G, Zakharenko SS (2010) Dysregulation of presynaptic calcium and synaptic plasticity in a mouse model of 22q11 deletion syndrome. *J Neurosci* 30: 15843-15855 Doi [10.1523/JNEUROSCI.1425-10.2010](https://doi.org/10.1523/JNEUROSCI.1425-10.2010)
- 42 Ehninger D, Han S, Shilyansky C, Zhou Y, Li W, Kwiatkowski DJ, Ramesh V, Silva AJ (2008) Reversal of learning deficits in a Tsc2<sup>+/-</sup> mouse model of tuberous sclerosis. *Nat Med* 14: 843-848 Doi [10.1038/nm1788](https://doi.org/10.1038/nm1788)
- 43 El-Kordi A, Winkler D, Hammerschmidt K, Kastner A, Krueger D, Ronnenberg A, Ritter C, Jatho J, Radyushkin K, Bourgeron T, et al (2013) Development of an autism severity score for mice using Nlgn4 null mutants as a construct-valid model of heritable monogenic autism. *Behav Brain Res* 251: 41-49 Doi [10.1016/j.bbr.2012.11.016](https://doi.org/10.1016/j.bbr.2012.11.016)
- 44 Ende S, Rosenberger G, Geider K, Popp B, Tamer C, Stefanova I, Milh M, Kortum F, Fritsch A, Pientka FK, et al (2010) Mutations in GRIN2A and GRIN2B encoding regulatory subunits of NMDA receptors cause variable neurodevelopmental phenotypes. *Nat Genet* 42: 1021-1026 Doi [10.1038/ng.677](https://doi.org/10.1038/ng.677)
- 45 Epi4K Consortium, Epilepsy Phenome/Genome Project, Allen AS, Berkovic SF, Cossette P, Delanty N, Dlugos D, Eichler EE, Epstein MP, Glauser T, et al (2013) De novo mutations in epileptic encephalopathies. *Nature* 501: 217-221 Doi [10.1038/nature12439](https://doi.org/10.1038/nature12439)
- 46 Etherton MR, Blaiss CA, Powell CM, Südhof TC (2009) Mouse neurexin-1 $\alpha$  deletion causes correlated electrophysiological and behavioral changes consistent with cognitive impairments. *Proc Natl Acad Sci U S A* 106: 17998-18003 Doi [10.1073/pnas.0910297106](https://doi.org/10.1073/pnas.0910297106)
- 47 Gabriel JM, Merchant M, Ohta T, Ji Y, Caldwell RG, Ramsey MJ, Tucker JD, Longnecker R, Nicholls RD (1999) A transgene insertion creating a heritable chromosome deletion mouse model of Prader-Willi and Angelman syndromes. *Proc Natl Acad Sci U S A* 96: 9258-9263
- 48 Gantois I, Pop AS, de Esch CE, Buijsen RA, Pooters T, Gomez-Mancilla B, Gasparini F, Oostra BA, D'Hooge R, Willemsen R (2013) Chronic administration of AFQ056/Mavoglurant restores social behaviour in Fmr1 knockout mice. *Behav Brain Res* 239: 72-79 Doi [10.1016/j.bbr.2012.10.059](https://doi.org/10.1016/j.bbr.2012.10.059)
- 49 Gauthier J, Siddiqui TJ, Huashan P, Yokomaku D, Hamdan FF, Champagne N, Lapointe M, Spiegelman D, Noreau A, Lafreniere RG, et al (2011) Truncating mutations in NRXN2 and NRXN1 in autism spectrum disorders and schizophrenia. *Hum Genet* 130: 563-573 Doi [10.1007/s00439-011-0975-z](https://doi.org/10.1007/s00439-011-0975-z)
- 50 Gazina EV, Leaw BT, Richards KL, Wimmer VC, Kim TH, Aumann TD, Featherby TJ, Churilov L, Hammond VE, Reid CA, et al (2015) 'Neonatal' Nav1.2 reduces neuronal excitability and affects seizure susceptibility and behaviour. *Hum Mol Genet* 24: 1457-1468 Doi [10.1093/hmg/ddu562](https://doi.org/10.1093/hmg/ddu562)
- 51 Gemelli T, Berton O, Nelson ED, Perrotti LI, Jaenisch R, Monteggia LM (2006) Postnatal loss of methyl-CpG binding protein 2 in the forebrain is sufficient to mediate behavioral aspects of Rett syndrome in mice. *Biol Psychiatry* 59: 468-476 Doi [10.1016/j.biopsych.2005.07.025](https://doi.org/10.1016/j.biopsych.2005.07.025)
- 52 Glessner JT, Wang K, Cai G, Korvatska O, Kim CE, Wood S, Zhang H, Estes A, Brune CW, Bradfield JP, et al (2009) Autism genome-wide copy number variation reveals ubiquitin and neuronal genes. *Nature* 459: 569-573 Doi [10.1038/nature07953](https://doi.org/10.1038/nature07953)
- 53 Goorden SM, van Woerden GM, van der Weerd L, Cheadle JP, Elgersma Y (2007) Cognitive deficits in Tsc1<sup>+/-</sup> mice in the absence of cerebral lesions and seizures. *Ann Neurol* 62: 648-655 Doi [10.1002/ana.21317](https://doi.org/10.1002/ana.21317)
- 54 Grayton HM, Missler M, Collier DA, Fernandes C (2013) Altered social behaviours in neurexin 1 $\alpha$  knockout mice resemble core symptoms in neurodevelopmental disorders. *PLoS One* 8: e67114 Doi [10.1371/journal.pone.0067114](https://doi.org/10.1371/journal.pone.0067114)
- 55 Guo W, Allan AM, Zong R, Zhang L, Johnson EB, Schaller EG, Murthy AC, Goggin SL, Eisch AJ, Oostra BA, et al (2011) Ablation of Fmrp in adult neural stem cells disrupts hippocampus-dependent learning. *Nat Med* 17: 559-565 Doi [10.1038/nm.2336](https://doi.org/10.1038/nm.2336)
- 56 Guo X, Hamilton PJ, Reish NJ, Sweatt JD, Miller CA, Rumbaugh G (2009) Reduced expression of the NMDA receptor-interacting protein SynGAP causes behavioral abnormalities that model symptoms of Schizophrenia. *Neuropsychopharmacology* 34: 1659-1672 Doi [10.1038/npp.2008.223](https://doi.org/10.1038/npp.2008.223)
- 57 Guy J, Hendrich B, Holmes M, Martin JE, Bird A (2001) A mouse Mecp2-null mutation causes neurological symptoms that mimic Rett syndrome. *Nat Genet* 27: 322-326 Doi [10.1038/85899](https://doi.org/10.1038/85899)
- 58 Hagerman R, Hoem G, Hagerman P (2010) Fragile X and autism: Intertwined at the molecular level leading to targeted treatments. *Mol Autism* 1: 12 Doi [10.1186/2040-2392-1-12](https://doi.org/10.1186/2040-2392-1-12)
- 59 Halgren C, Kjaergaard S, Bak M, Hansen C, El-Schich Z, Anderson CM, Henriksen KF, Hjalgrim H, Kirchhoff M, Bijlsma EK, et al (2012) Corpus callosum abnormalities, intellectual disability, speech impairment, and autism in patients with haploinsufficiency of ARID1B. *Clin Genet* 82: 248-255 Doi [10.1111/j.1399-0004.2011.01755.x](https://doi.org/10.1111/j.1399-0004.2011.01755.x)
- 60 Hamdan FF, Gauthier J, Spiegelman D, Noreau A, Yang Y, Pellerin S, Dobrzeniecka S, Cote M, Perreau-Linck E, Carmant L, et al (2009) Mutations in SYNGAP1 in autosomal nonsyndromic mental retardation. *N Engl J Med* 360: 599-605 Doi [10.1056/NEJMoa0805392](https://doi.org/10.1056/NEJMoa0805392)

- 61 Hamilton SM, Green JR, Veeraragavan S, Yuva L, McCoy A, Wu Y, Warren J, Little L, Ji D, Cui X, et al (2014) Fmr1 and Nlgn3 knockout rats: novel tools for investigating autism spectrum disorders. *Behav Neurosci* 128: 103-109 Doi [10.1037/a0035988](https://doi.org/10.1037/a0035988)
- 62 Han Q, Kim YH, Wang X, Liu D, Zhang ZJ, Bey AL, Lay M, Chang W, Berta T, Zhang Y, et al (2016) SHANK3 Deficiency Impairs Heat Hyperalgesia and TRPV1 Signaling in Primary Sensory Neurons. *Neuron* 92: 1279-1293 Doi [10.1016/j.neuron.2016.11.007](https://doi.org/10.1016/j.neuron.2016.11.007)
- 63 Harony-Nicolas H, De Rubeis S, Kolevzon A, Buxbaum JD (2015) Phelan McDermid syndrome: From genetic discoveries to animal models and treatment. *J Child Neurol* 30: 1861-1870 Doi [10.1177/0883073815600872](https://doi.org/10.1177/0883073815600872)
- 64 Harony-Nicolas H, Kay M, Hoffmann JD, Klein ME, Bozdagi-Gunal O, Riad M, Daskalakis NP, Sonar S, Castillo PE, Hof PR, et al (2017) Oxytocin improves behavioral and electrophysiological deficits in a novel Shank3-deficient rat. *Elife* 6: Doi [10.7554/eLife.18904](https://doi.org/10.7554/eLife.18904)
- 65 Horev G, Ellegood J, Lerch JP, Son YE, Muthuswamy L, Vogel H, Krieger AM, Buja A, Henkelman RM, Wigler M, et al (2011) Dosage-dependent phenotypes in models of 16p11.2 lesions found in autism. *Proc Natl Acad Sci U S A* 108: 17076-17081 Doi [10.1073/pnas.1114042108](https://doi.org/10.1073/pnas.1114042108)
- 66 Huang HS, Burns AJ, Nonneman RJ, Baker LK, Riddick NV, Nikolova VD, Riday TT, Yashiro K, Philpot BD, Moy SS (2013) Behavioral deficits in an Angelman syndrome model: effects of genetic background and age. *Behav Brain Res* 243: 79-90 Doi [10.1016/j.bbr.2012.12.052](https://doi.org/10.1016/j.bbr.2012.12.052)
- 67 Huang TN, Chuang HC, Chou WH, Chen CY, Wang HF, Chou SJ, Hsueh YP (2014) Tbr1 haploinsufficiency impairs amygdalar axonal projections and results in cognitive abnormality. *Nat Neurosci* 17: 240-247 Doi [10.1038/nn.3626](https://doi.org/10.1038/nn.3626)
- 68 International Schizophrenia Consortium (2008) Rare chromosomal deletions and duplications increase risk of schizophrenia. *Nature* 455: 237-241 Doi [10.1038/nature07239](https://doi.org/10.1038/nature07239)
- 69 Iossifov I, O'Roak BJ, Sanders SJ, Ronemus M, Krumm N, Levy D, Stessman HA, Witherspoon KT, Vives L, Patterson KE, et al (2014) The contribution of de novo coding mutations to autism spectrum disorder. *Nature* 515: 216-221 Doi [10.1038/nature13908](https://doi.org/10.1038/nature13908)
- 70 Jamain S, Quach H, Betancur C, Rastam M, Colineaux C, Gillberg IC, Soderstrom H, Giros B, Leboyer M, Gillberg C, et al (2003) Mutations of the X-linked genes encoding neuroligins NLGN3 and NLGN4 are associated with autism. *Nat Genet* 34: 27-29 Doi [10.1038/ng1136](https://doi.org/10.1038/ng1136)
- 71 Jamain S, Radyushkin K, Hammerschmidt K, Granon S, Boretius S, Varoqueaux F, Ramanantsoa N, Gallego J, Ronnenberg A, Winter D, et al (2008) Reduced social interaction and ultrasonic communication in a mouse model of monogenic heritable autism. *Proc Natl Acad Sci U S A* 105: 1710-1715 Doi [10.1073/pnas.0711555105](https://doi.org/10.1073/pnas.0711555105)
- 72 Jaramillo TC, Liu S, Pettersen A, Birnbaum SG, Powell CM (2014) Autism-related neuroligin-3 mutation alters social behavior and spatial learning. *Autism Res* 7: 264-272 Doi [10.1002/aur.1362](https://doi.org/10.1002/aur.1362)
- 73 Jaramillo TC, Speed HE, Xuan Z, Reimers JM, Escamilla CO, Weaver TP, Liu S, Filonova I, Powell CM (2017) Novel Shank3 mutant exhibits behaviors with face validity for autism and altered striatal and hippocampal function. *Autism Res* 10: 42-65 Doi [10.1002/aur.1664](https://doi.org/10.1002/aur.1664)
- 74 Jaramillo TC, Speed HE, Xuan Z, Reimers JM, Liu S, Powell CM (2016) Altered striatal synaptic function and abnormal behaviour in Shank3 exon4-9 deletion mouse model of autism. *Autism Res* 9: 350-375 Doi [10.1002/aur.1529](https://doi.org/10.1002/aur.1529)
- 75 Jiang YH, Armstrong D, Albrecht U, Atkins CM, Noebels JL, Eichele G, Sweatt JD, Beaudet AL (1998) Mutation of the Angelman ubiquitin ligase in mice causes increased cytoplasmic p53 and deficits of contextual learning and long-term potentiation. *Neuron* 21: 799-811 Doi [S0896-6273\(00\)80596-6](https://doi.org/S0896-6273(00)80596-6) [pii]
- 76 Ju A, Hammerschmidt K, Tantra M, Krueger D, Brose N, Ehrenreich H (2014) Juvenile manifestation of ultrasound communication deficits in the neuroligin-4 null mutant mouse model of autism. *Behav Brain Res* 270: 159-164 Doi [10.1016/j.bbr.2014.05.019](https://doi.org/10.1016/j.bbr.2014.05.019)
- 77 Kalsner L, Chamberlain SJ (2015) Prader-Willi, Angelman, and 15q11-q13 duplication syndromes. *Pediatr Clin North Am* 62: 587-606 Doi [10.1016/j.pcl.2015.03.004](https://doi.org/10.1016/j.pcl.2015.03.004)
- 78 Katayama Y, Nishiyama M, Shoji H, Ohkawa Y, Kawamura A, Sato T, Suyama M, Takumi T, Miyakawa T, Nakayama KI (2016) CHD8 haploinsufficiency results in autistic-like phenotypes in mice. *Nature* 537: 675-679 Doi [10.1038/nature19357](https://doi.org/10.1038/nature19357)
- 79 Kearney JA, Plummer NW, Smith MR, Kapur J, Cummins TR, Waxman SG, Goldin AL, Meisler MH (2001) A gain-of-function mutation in the sodium channel gene Scn2a results in seizures and behavioral abnormalities. *Neuroscience* 102: 307-317
- 80 Kim HG, Kishikawa S, Higgins AW, Seong IS, Donovan DJ, Shen Y, Lally E, Weiss LA, Najm J, Kutsche K, et al (2008) Disruption of neurexin 1 associated with autism spectrum disorder. *Am J Hum Genet* 82: 199-207 Doi [10.1016/j.ajhg.2007.09.011](https://doi.org/10.1016/j.ajhg.2007.09.011)

- 81 Kimura H, Wang C, Ishizuka K, Xing J, Takasaki Y, Kushima I, Aleksic B, Uno Y, Okada T, Ikeda M, et al (2016) Identification of a rare variant in CHD8 that contributes to schizophrenia and autism spectrum disorder susceptibility. *Schizophr Res* 178: 104-106 Doi [10.1016/j.schres.2016.08.023](https://doi.org/10.1016/j.schres.2016.08.023)
- 82 Kishino T, Lalande M, Wagstaff J (1997) UBE3A/E6-AP mutations cause Angelman syndrome. *Nat Genet* 15: 70-73 Doi [10.1038/ng0197-70](https://doi.org/10.1038/ng0197-70)
- 83 Kogan JH, Gross AK, Featherstone RE, Shin R, Chen Q, Heusner CL, Adachi M, Lin A, Walton NM, Miyoshi S, et al (2015) Mouse model of chromosome 15q13.3 microdeletion syndrome demonstrates features related to autism spectrum disorder. *J Neurosci* 35: 16282-16294 Doi [10.1523/JNEUROSCI.3967-14.2015](https://doi.org/10.1523/JNEUROSCI.3967-14.2015)
- 84 Kouser M, Speed HE, Dewey CM, Reimers JM, Widman AJ, Gupta N, Liu S, Jaramillo TC, Bangash M, Xiao B, et al (2013) Loss of predominant Shank3 isoforms results in hippocampus-dependent impairments in behavior and synaptic transmission. *J Neurosci* 33: 18448-18468 Doi [10.1523/JNEUROSCI.3017-13.2013](https://doi.org/10.1523/JNEUROSCI.3017-13.2013)
- 85 Kozlov SV, Bogenpohl JW, Howell MP, Wevrick R, Panda S, Hogenesch JB, Muglia LJ, Van Gelder RN, Herzog ED, Stewart CL (2007) The imprinted gene Magel2 regulates normal circadian output. *Nat Genet* 39: 1266-1272 Doi [10.1038/ng2114](https://doi.org/10.1038/ng2114)
- 86 Kramvis I, Mansvelder HD, Loos M, Meredith R (2013) Hyperactivity, perseveration and increased responding during attentional rule acquisition in the Fragile X mouse model. *Front Behav Neurosci* 7: 172 Doi [10.3389/fnbeh.2013.00172](https://doi.org/10.3389/fnbeh.2013.00172)
- 87 Kumar RA, KaraMohamed S, Sudi J, Conrad DF, Brune C, Badner JA, Gilliam TC, Nowak NJ, Cook EH, Jr., Dobyns WB, et al (2008) Recurrent 16p11.2 microdeletions in autism. *Hum Mol Genet* 17: 628-638 Doi [10.1093/hmg/ddm376](https://doi.org/10.1093/hmg/ddm376)
- 88 Kutsuwada T, Sakimura K, Manabe T, Takayama C, Katakura N, Kushiya E, Natsume R, Watanabe M, Inoue Y, Yagi T, et al (1996) Impairment of suckling response, trigeminal neuronal pattern formation, and hippocampal LTD in NMDA receptor epsilon 2 subunit mutant mice. *Neuron* 16: 333-344
- 89 Kwiatkowski DJ, Zhang H, Bandura JL, Heiberger KM, Glogauer M, el-Hashemite N, Onda H (2002) A mouse model of TSC1 reveals sex-dependent lethality from liver hemangiomas, and up-regulation of p70S6 kinase activity in Tsc1 null cells. *Hum Mol Genet* 11: 525-534
- 90 Lalley PM (2007) Post-inspiratory discharges are the centrepiece of respiratory dysrhythmia in a gene knockout model of Rett syndrome. *J Physiol* 579: 565 Doi [10.1113/jphysiol.2007.128249](https://doi.org/10.1113/jphysiol.2007.128249)
- 91 Laumonier F, Bonnet-Brilhault F, Gomot M, Blanc R, David A, Moizard MP, Raynaud M, Ronce N, Lemonnier E, Calvas P, et al (2004) X-linked mental retardation and autism are associated with a mutation in the NLGN4 gene, a member of the neuroligin family. *Am J Hum Genet* 74: 552-557 Doi [10.1086/382137](https://doi.org/10.1086/382137)
- 92 Lee J, Chung C, Ha S, Lee D, Kim DY, Kim H, Kim E (2015) Shank3-mutant mice lacking exon 9 show altered excitation/inhibition balance, enhanced rearing, and spatial memory deficit. *Front Cell Neurosci* 9: 94 Doi [10.3389/fncel.2015.00094](https://doi.org/10.3389/fncel.2015.00094)
- 93 Liu Z, Li X, Zhang JT, Cai YJ, Cheng TL, Cheng C, Wang Y, Zhang CC, Nie YH, Chen ZF, et al (2016) Autism-like behaviours and germline transmission in transgenic monkeys overexpressing MeCP2. *Nature* 530: 98-102 Doi [10.1038/nature16533](https://doi.org/10.1038/nature16533)
- 94 Marchetto MC, Carromeu C, Acab A, Yu D, Yeo GW, Mu Y, Chen G, Gage FH, Muotri AR (2010) A model for neural development and treatment of Rett syndrome using human induced pluripotent stem cells. *Cell* 143: 527-539 Doi [10.1016/j.cell.2010.10.016](https://doi.org/10.1016/j.cell.2010.10.016)
- 95 Margolis SS, Sell GL, Zbinden MA, Bird LM (2015) Angelman syndrome. *Neurotherapeutics* 12: 641-650 Doi [10.1007/s13311-015-0361-y](https://doi.org/10.1007/s13311-015-0361-y)
- 96 Marshall CR, Noor A, Vincent JB, Lionel AC, Feuk L, Skaug J, Shago M, Moessner R, Pinto D, Ren Y, et al (2008) Structural variation of chromosomes in autism spectrum disorder. *Am J Hum Genet* 82: 477-488 Doi [10.1016/j.ajhg.2007.12.009](https://doi.org/10.1016/j.ajhg.2007.12.009)
- 97 McNaughton CH, Moon J, Strawderman MS, Maclean KN, Evans J, Strupp BJ (2008) Evidence for social anxiety and impaired social cognition in a mouse model of fragile X syndrome. *Behav Neurosci* 122: 293-300 Doi [10.1037/0735-7044.122.2.293](https://doi.org/10.1037/0735-7044.122.2.293)
- 98 Meechan DW, Rutz HL, Fralish MS, Maynard TM, Rothblat LA, LaMantia AS (2015) Cognitive ability is associated with altered medial frontal cortical circuits in the LgDel mouse model of 22q11.2DS. *Cereb Cortex* 25: 1143-1151 Doi [10.1093/cercor/bht308](https://doi.org/10.1093/cercor/bht308)
- 99 Mei Y, Monteiro P, Zhou Y, Kim JA, Gao X, Fu Z, Feng G (2016) Adult restoration of Shank3 expression rescues selective autistic-like phenotypes. *Nature* 530: 481-484 Doi [10.1038/nature16971](https://doi.org/10.1038/nature16971)
- 100 Meikle L, Talos DM, Onda H, Pollizzi K, Rotenberg A, Sahin M, Jensen FE, Kwiatkowski DJ (2007) A mouse model of tuberous sclerosis: neuronal loss of Tsc1 causes dysplastic and ectopic neurons, reduced myelination, seizure activity, and limited survival. *J Neurosci* 27: 5546-5558 Doi [10.1523/JNEUROSCI.5540-06.2007](https://doi.org/10.1523/JNEUROSCI.5540-06.2007)

- 101 Mignot C, von Stulpnagel C, Nava C, Ville D, Sanlaville D, Lesca G, Rastetter A, Gachet B, Marie Y, Korenke GC, et al (2016) Genetic and neurodevelopmental spectrum of SYNGAP1-associated intellectual disability and epilepsy. *J Med Genet* 53: 511-522 Doi [10.1136/jmedgenet-2015-103451](https://doi.org/10.1136/jmedgenet-2015-103451)
- 102 Miura K, Kishino T, Li E, Webber H, Dikkes P, Holmes GL, Wagstaff J (2002) Neurobehavioral and electroencephalographic abnormalities in Ube3a maternal-deficient mice. *Neurobiol Dis* 9: 149-159 Doi [10.1006/nbdi.2001.0463](https://doi.org/10.1006/nbdi.2001.0463)
- 103 Nakatani J, Tamada K, Hatanaka F, Ise S, Ohta H, Inoue K, Tomonaga S, Watanabe Y, Chung YJ, Banerjee R, et al (2009) Abnormal behavior in a chromosome-engineered mouse model for human 15q11-13 duplication seen in autism. *Cell* 137: 1235-1246 Doi [10.1016/j.cell.2009.04.024](https://doi.org/10.1016/j.cell.2009.04.024)
- 104 Neale BM, Kou Y, Liu L, Ma'ayan A, Samocha KE, Sabo A, Lin CF, Stevens C, Wang LS, Makarov V, et al (2012) Patterns and rates of exonic de novo mutations in autism spectrum disorders. *Nature* 485: 242-245 Doi [10.1038/nature11011](https://doi.org/10.1038/nature11011)
- 105 Niklasson L, Rasmussen P, Oskarsdottir S, Gillberg C (2009) Autism, ADHD, mental retardation and behavior problems in 100 individuals with 22q11 deletion syndrome. *Res Dev Disabil* 30: 763-773 Doi [10.1016/j.ridd.2008.10.007](https://doi.org/10.1016/j.ridd.2008.10.007)
- 106 Nord AS, Roeb W, Dickel DE, Walsh T, Kusenda M, O'Connor KL, Malhotra D, McCarthy SE, Stray SM, Taylor SM, et al (2011) Reduced transcript expression of genes affected by inherited and de novo CNVs in autism. *Eur J Hum Genet* 19: 727-731 Doi [10.1038/ejhg.2011.24](https://doi.org/10.1038/ejhg.2011.24)
- 107 O'Roak BJ, Vives L, Girirajan S, Karakoc E, Krumm N, Coe BP, Levy R, Ko A, Lee C, Smith JD, et al (2012) Sporadic autism exomes reveal a highly interconnected protein network of de novo mutations. *Nature* 485: 246-250 Doi [10.1038/nature10989](https://doi.org/10.1038/nature10989)
- 108 Pagnamenta AT, Wing K, Sadighi Akha E, Knight SJ, Bolte S, Schmotzer G, Duketis E, Poustka F, Klauck SM, Poustka A, et al (2009) A 15q13.3 microdeletion segregating with autism. *Eur J Hum Genet* 17: 687-692 Doi [10.1038/ejhg.2008.228](https://doi.org/10.1038/ejhg.2008.228)
- 109 Paylor R, McIlwain KL, McAninch R, Nellis A, Yuva-Paylor LA, Baldini A, Lindsay EA (2001) Mice deleted for the DiGeorge/velocardiofacial syndrome region show abnormal sensorimotor gating and learning and memory impairments. *Hum Mol Genet* 10: 2645-2650
- 110 Peça J, Feliciano C, Ting JT, Wang WT, Wells MF, Venkatraman TN, Lascola CD, Fu ZY, Feng GP (2011) Shank3 mutant mice display autistic-like behaviours and striatal dysfunction. *Nature* 472: 437-442 Doi [10.1038/nature09965](https://doi.org/10.1038/nature09965)
- 111 Peñagarikano O, Abrahams BS, Herman EI, Winden KD, Gdalyahu A, Dong H, Sonnenblick LI, Gruver R, Almajano J, Bragin A, et al (2011) Absence of CNTNAP2 leads to epilepsy, neuronal migration abnormalities, and core autism-related deficits. *Cell* 147: 235-246 Doi [10.1016/j.cell.2011.08.040](https://doi.org/10.1016/j.cell.2011.08.040)
- 112 Phelan K, McDermid HE (2012) The 22q13.3 deletion syndrome (Phelan-McDermid syndrome). *Mol Syndromol* 2: 186-201 Doi [10.1159/000334260](https://doi.org/10.1159/000334260)
- 113 Platt RJ, Zhou Y, Slaymaker IM, Shetty AS, Weisbach NR, Kim JA, Sharma J, Desai M, Sood S, Kempton HR, et al (2017) Chd8 mutation leads to autistic-like behaviors and impaired striatal circuits. *Cell Rep* 19: 335-350 Doi [10.1016/j.celrep.2017.03.052](https://doi.org/10.1016/j.celrep.2017.03.052)
- 114 Radyushkin K, Hammerschmidt K, Boretius S, Varoqueaux F, El-Kordi A, Ronnenberg A, Winter D, Frahm J, Fischer J, Brose N, et al (2009) Neuroigin-3-deficient mice: model of a monogenic heritable form of autism with an olfactory deficit. *Genes Brain Behav* 8: 416-425 Doi [10.1111/j.1601-183X.2009.00487.x](https://doi.org/10.1111/j.1601-183X.2009.00487.x)
- 115 Ramocki MB, Peters SU, Tavyev YJ, Zhang F, Carvalho CM, Schaaf CP, Richman R, Fang P, Glaze DG, Lupski JR, et al (2009) Autism and other neuropsychiatric symptoms are prevalent in individuals with MeCP2 duplication syndrome. *Ann Neurol* 66: 771-782 Doi [10.1002/ana.21715](https://doi.org/10.1002/ana.21715)
- 116 Reith RM, McKenna J, Wu H, Hashmi SS, Cho SH, Dash PK, Gambello MJ (2013) Loss of Tsc2 in Purkinje cells is associated with autistic-like behavior in a mouse model of tuberous sclerosis complex. *Neurobiol Dis* 51: 93-103 Doi [10.1016/j.nbd.2012.10.014](https://doi.org/10.1016/j.nbd.2012.10.014)
- 117 Relkovic D, Isles AR (2013) Behavioural and cognitive profiles of mouse models for Prader-Willi syndrome. *Brain Res Bull* 92: 41-48 Doi [10.1016/j.brainresbull.2011.09.009](https://doi.org/10.1016/j.brainresbull.2011.09.009)
- 118 Rett A (1966) [On a unusual brain atrophy syndrome in hyperammonemia in childhood]. *Wien Med Wochenschr* 116: 723-726
- 119 Richards C, Jones C, Groves L, Moss J, Oliver C (2015) Prevalence of autism spectrum disorder phenomenology in genetic disorders: a systematic review and meta-analysis. *Lancet Psychiatry* 2: 909-916 Doi [10.1016/S2215-0366\(15\)00376-4](https://doi.org/10.1016/S2215-0366(15)00376-4)
- 120 Rothwell PE, Fuccillo MV, Maxeiner S, Hayton SJ, Gokce O, Lim BK, Fowler SC, Malenka RC, Südhof TC (2014) Autism-associated neuroigin-3 mutations commonly impair striatal circuits to boost repetitive behaviors. *Cell* 158: 198-212 Doi [10.1016/j.cell.2014.04.045](https://doi.org/10.1016/j.cell.2014.04.045)
- 121 Samaco RC, Mandel-Brehm C, McGraw CM, Shaw CA, McGill BE, Zoghbi HY (2012) Crh and Oprm1 mediate anxiety-related behavior and social approach in a mouse model of MECP2 duplication syndrome. *Nat Genet* 44: 206-211 Doi [10.1038/ng.1066](https://doi.org/10.1038/ng.1066)

- 122 Samaco RC, McGraw CM, Ward CS, Sun Y, Neul JL, Zoghbi HY (2013) Female Mecp2(+/-) mice display robust behavioral deficits on two different genetic backgrounds providing a framework for pre-clinical studies. *Hum Mol Genet* 22: 96-109 Doi [10.1093/hmg/dds406](https://doi.org/10.1093/hmg/dds406)
- 123 Santen GW, Clayton-Smith J, consortium ABC (2014) The ARID1B phenotype: what we have learned so far. *Am J Med Genet C Semin Med Genet* 166C: 276-289 Doi [10.1002/ajmg.c.31414](https://doi.org/10.1002/ajmg.c.31414)
- 124 Sato A, Kasai S, Kobayashi T, Takamatsu Y, Hino O, Ikeda K, Mizuguchi M (2012) Rapamycin reverses impaired social interaction in mouse models of tuberous sclerosis complex. *Nat Commun* 3: 1292 Doi [10.1038/ncomms2295](https://doi.org/10.1038/ncomms2295)
- 125 Sharp AJ, Mefford HC, Li K, Baker C, Skinner C, Stevenson RE, Schroer RJ, Novara F, De Gregori M, Ciccone R, et al (2008) A recurrent 15q13.3 microdeletion syndrome associated with mental retardation and seizures. *Nat Genet* 40: 322-328 Doi [10.1038/ng.93](https://doi.org/10.1038/ng.93)
- 126 Smith SE, Zhou YD, Zhang G, Jin Z, Stoppel DC, Anderson MP (2011) Increased gene dosage of Ube3a results in autism traits and decreased glutamate synaptic transmission in mice. *Sci Transl Med* 3: 103ra197 Doi [10.1126/scitranslmed.3002627](https://doi.org/10.1126/scitranslmed.3002627)
- 127 Spencer CM, Alekseyenko O, Hamilton SM, Thomas AM, Serysheva E, Yuva-Paylor LA, Paylor R (2011) Modifying behavioral phenotypes in Fmr1KO mice: genetic background differences reveal autistic-like responses. *Autism Res* 4: 40-56 Doi [10.1002/aur.168](https://doi.org/10.1002/aur.168)
- 128 Spencer CM, Alekseyenko O, Serysheva E, Yuva-Paylor LA, Paylor R (2005) Altered anxiety-related and social behaviors in the Fmr1 knockout mouse model of fragile X syndrome. *Genes Brain Behav* 4: 420-430 Doi [10.1111/j.1601-183X.2005.00123.x](https://doi.org/10.1111/j.1601-183X.2005.00123.x)
- 129 Stark KL, Xu B, Bagchi A, Lai WS, Liu H, Hsu R, Wan X, Pavlidis P, Mills AA, Karayiorgou M, et al (2008) Altered brain microRNA biogenesis contributes to phenotypic deficits in a 22q11-deletion mouse model. *Nat Genet* 40: 751-760 Doi [10.1038/ng.138](https://doi.org/10.1038/ng.138)
- 130 Stolerman ES, Smith B, Chaubey A, Jones JR (2016) CHD8 intragenic deletion associated with autism spectrum disorder. *Eur J Med Genet* 59: 189-194 Doi [10.1016/j.ejmg.2016.02.010](https://doi.org/10.1016/j.ejmg.2016.02.010)
- 131 Strauss KA, Puffenberger EG, Huentelman MJ, Gottlieb S, Dobrin SE, Parod JM, Stephan DA, Morton DH (2006) Recessive symptomatic focal epilepsy and mutant contactin-associated protein-like 2. *N Engl J Med* 354: 1370-1377 Doi [10.1056/NEJMoa052773](https://doi.org/10.1056/NEJMoa052773)
- 132 Sugathan A, Biagioli M, Golzio C, Erdin S, Blumenthal I, Manavalan P, Ragavendran A, Brand H, Lucente D, Miles J, et al (2014) CHD8 regulates neurodevelopmental pathways associated with autism spectrum disorder in neural progenitors. *Proc Natl Acad Sci U S A* 111: E4468-4477 Doi [10.1073/pnas.1405266111](https://doi.org/10.1073/pnas.1405266111)
- 133 Szatmari P, Paterson AD, Zwaigenbaum L, Roberts W, Brian J, Liu XQ, Vincent JB, Skaug JL, Thompson AP, Senman L, et al (2007) Mapping autism risk loci using genetic linkage and chromosomal rearrangements. *Nat Genet* 39: 319-328 Doi [10.1038/ng1985](https://doi.org/10.1038/ng1985)
- 134 Tabuchi K, Blundell J, Etherton MR, Hammer RE, Liu X, Powell CM, Südhof TC (2007) A neuroligin-3 mutation implicated in autism increases inhibitory synaptic transmission in mice. *Science* 318: 71-76 Doi [10.1126/science.1146221](https://doi.org/10.1126/science.1146221)
- 135 Talkowski ME, Rosenfeld JA, Blumenthal I, Pillalamarri V, Chiang C, Heilbut A, Ernst C, Hanscom C, Rossin E, Lindgren AM, et al (2012) Sequencing chromosomal abnormalities reveals neurodevelopmental loci that confer risk across diagnostic boundaries. *Cell* 149: 525-537 Doi [10.1016/j.cell.2012.03.028](https://doi.org/10.1016/j.cell.2012.03.028)
- 136 Thomas AM, Schwartz MD, Saxe MD, Kilduff TS (2017) Cntnap2 Knockout Rats and Mice Exhibit Epileptiform Activity and Abnormal Sleep-Wake Physiology. *Sleep* 40: Doi [10.1093/sleep/zsw026](https://doi.org/10.1093/sleep/zsw026)
- 137 Tsai PT, Hull C, Chu Y, Greene-Colozzi E, Sadowski AR, Leech JM, Steinberg J, Crawley JN, Regehr WG, Sahin M (2012) Autistic-like behaviour and cerebellar dysfunction in Purkinje cell Tsc1 mutant mice. *Nature* 488: 647-651 Doi [10.1038/nature11310](https://doi.org/10.1038/nature11310)
- 138 Turner TN, Hormozdiari F, Duyzend MH, McClymont SA, Hook PW, Iossifov I, Raja A, Baker C, Hoekzema K, Stessman HA, et al (2016) Genome Sequencing of Autism-Affected Families Reveals Disruption of Putative Noncoding Regulatory DNA. *Am J Hum Genet* 98: 58-74 Doi [10.1016/j.ajhg.2015.11.023](https://doi.org/10.1016/j.ajhg.2015.11.023)
- 139 Udagawa T, Farny NG, Jakovcevski M, Kaphzan H, Alarcon JM, Anilkumar S, Ivshina M, Hurt JA, Nagaoka K, Nalavadi VC, et al (2013) Genetic and acute CPEB1 depletion ameliorate fragile X pathophysiology. *Nat Med* 19: 1473-1477 Doi [10.1038/nm.3353](https://doi.org/10.1038/nm.3353)
- 140 Vicidomini C, Ponzoni L, Lim D, Schmeisser MJ, Reim D, Morello N, Orellana D, Tozzi A, Durante V, Scalmani P, et al (2017) Pharmacological enhancement of mGlu5 receptors rescues behavioral deficits in SHANK3 knock-out mice. *Mol Psychiatry* 22: 689-702 Doi [10.1038/mp.2016.30](https://doi.org/10.1038/mp.2016.30)
- 141 Wang X, Bey AL, Katz BM, Badea A, Kim N, David LK, Duffney LJ, Kumar S, Mague SD, Hulbert SW, et al (2016) Altered mGluR5-Homer scaffolds and corticostriatal connectivity in a Shank3 complete knockout model of autism. *Nat Commun* 7: 11459 Doi [10.1038/ncomms11459](https://doi.org/10.1038/ncomms11459)

- 142 Wang X, McCoy PA, Rodriguiz RM, Pan Y, Je HS, Roberts AC, Kim CJ, Berrios J, Colvin JS, Bousquet-Moore D, et al (2011) Synaptic dysfunction and abnormal behaviors in mice lacking major isoforms of Shank3. *Hum Mol Genet* 20: 3093-3108 Doi [10.1093/hmg/ddr212](https://doi.org/10.1093/hmg/ddr212)
- 143 Weiss LA, Escayg A, Kearney JA, Trudeau M, MacDonald BT, Mori M, Reichert J, Buxbaum JD, Meisler MH (2003) Sodium channels SCN1A, SCN2A and SCN3A in familial autism. *Mol Psychiatry* 8: 186-194 Doi [10.1038/sj.mp.4001241](https://doi.org/10.1038/sj.mp.4001241)
- 144 Weiss LA, Shen Y, Korn JM, Arking DE, Miller DT, Fossdal R, Saemundsen E, Stefansson H, Ferreira MA, Green T, et al (2008) Association between microdeletion and microduplication at 16p11.2 and autism. *N Engl J Med* 358: 667-675 Doi [10.1056/NEJMoa075974](https://doi.org/10.1056/NEJMoa075974)
- 145 Wilson HL, Wong AC, Shaw SR, Tse WY, Stapleton GA, Phelan MC, Hu S, Marshall J, McDermid HE (2003) Molecular characterisation of the 22q13 deletion syndrome supports the role of haploinsufficiency of SHANK3/PROSAP2 in the major neurological symptoms. *J Med Genet* 40: 575-584
- 146 Wolff M, Johannesen KM, Hedrich UB, Masnada S, Rubboli G, Gardella E, Lesca G, Ville D, Milh M, Villard L, et al (2017) Genetic and phenotypic heterogeneity suggest therapeutic implications in SCN2A-related disorders. *Brain*: Doi [10.1093/brain/awx054](https://doi.org/10.1093/brain/awx054)
- 147 Xu Y, Ye H, Shen Y, Xu Q, Zhu L, Liu J, Wu JY (2011) Dscam mutation leads to hydrocephalus and decreased motor function. *Protein Cell* 2: 647-655 Doi [10.1007/s13238-011-1072-8](https://doi.org/10.1007/s13238-011-1072-8)
- 148 Yan QJ, Asafo-Adjei PK, Arnold HM, Brown RE, Bauchwitz RP (2004) A phenotypic and molecular characterization of the fmr1-tm1Cgr fragile X mouse. *Genes Brain Behav* 3: 337-359 Doi [10.1111/j.1601-183X.2004.00087.x](https://doi.org/10.1111/j.1601-183X.2004.00087.x)
- 149 Yang M, Bozdagi O, Scattoni ML, Wöhr M, Roulet FI, Katz AM, Abrams DN, Kalikhman D, Simon H, Woldeyohannes L, et al (2012) Reduced excitatory neurotransmission and mild autism-relevant phenotypes in adolescent Shank3 null mutant mice. *J Neurosci* 32: 6525-6541 Doi [10.1523/JNEUROSCI.6107-11.2012](https://doi.org/10.1523/JNEUROSCI.6107-11.2012)
- 150 Young DM, Schenk AK, Yang SB, Jan YN, Jan LY (2010) Altered ultrasonic vocalizations in a tuberous sclerosis mouse model of autism. *Proc Natl Acad Sci U S A* 107: 11074-11079 Doi [10.1073/pnas.1005620107](https://doi.org/10.1073/pnas.1005620107)
- 151 Zahir F, Firth HV, Baross A, Delaney AD, Eydoux P, Gibson WT, Langlois S, Martin H, Willatt L, Marra MA, et al (2007) Novel deletions of 14q11.2 associated with developmental delay, cognitive impairment and similar minor anomalies in three children. *J Med Genet* 44: 556-561 Doi [10.1136/jmg.2007.050823](https://doi.org/10.1136/jmg.2007.050823)

**SUPPLEMENTARY TABLE 3 Summary of ASD-behavioral phenotypes in models of idiopathic ASD**

| <b>Model</b>                             | <b>Behavioral phenotype</b>                                                                                                                                                                                                                                                                                                                                                                                                                                                                                                                                                                                                                                                                                                               |
|------------------------------------------|-------------------------------------------------------------------------------------------------------------------------------------------------------------------------------------------------------------------------------------------------------------------------------------------------------------------------------------------------------------------------------------------------------------------------------------------------------------------------------------------------------------------------------------------------------------------------------------------------------------------------------------------------------------------------------------------------------------------------------------------|
| BTBR-T <sup>+</sup> tf/J                 | <ul style="list-style-type: none"> <li>• Low sociability [9, 22, 23], reduced reciprocal social interactions in dyads [19, 25, 38], aberrant vocalizations, and impairments in several social settings such as scent marking and social transmission of food preference [19, 27-29]</li> <li>• High level of stereotypies or repetitive behaviors, including jumping, digging, self-grooming, perseverative marble burying and unusual hole board exploration [1, 19, 21, 25, 31, 32, 36, 37]</li> <li>• Comorbidities: cognitive rigidity in reversal learning tasks, hyperactivity in the open field, impaired motor performance on the rotarod, and inconsistent performance in tests of anxiety-like behavior [14, 23, 35]</li> </ul> |
| BALB/cByJ                                | <ul style="list-style-type: none"> <li>• Significant social deficits compared to inbred mouse strains with high sociability, such as C57BL/6J and FVB/NJ mice [8, 22, 23], including juvenile social interactions [5, 8], low levels of sociability in the social approach assay ([8, 9, 12, 22, 23], reduced reciprocal social interactions [6, 24]</li> <li>• No repetitive self-grooming [33]</li> </ul>                                                                                                                                                                                                                                                                                                                               |
| Prenatal sodium valproate (VPA) exposure | <ul style="list-style-type: none"> <li>• Social deficits, with reduced social exploration, and low numbers of isolation-induced ultrasonic vocalizations in both mouse and rat pups, low levels of juvenile rough and tumble play in rats [13, 20, 30, 34]</li> <li>• Increased frequency of motor stereotypies and repetitive marble burying, decreased sensitivity to pain, increased anxiety [34]</li> <li>• Sexual divergence in behavior, with males being more affected than females [15, 26]</li> </ul>                                                                                                                                                                                                                            |
| Maternal autoantibodies                  | <ul style="list-style-type: none"> <li>• Deficits in development, increased ultrasonic vocalizations, and increased stereotypical behaviors in mice [7, 10, 11]</li> <li>• Increased stereotypies and atypical social behavior in rhesus monkeys [2, 4, 18]</li> </ul>                                                                                                                                                                                                                                                                                                                                                                                                                                                                    |
| Maternal immune activation               | <ul style="list-style-type: none"> <li>• Reduced ultrasonic vocalizations, decreased social interaction, and repetitive behaviors in mice [17]</li> <li>• Stereotypical behavior, increased vocalizations, atypical social interactions [3], deficits in social attention in rhesus monkeys [4, 16]</li> </ul>                                                                                                                                                                                                                                                                                                                                                                                                                            |

Behavioral phenotypes observed in ASD models derived from inbred strains and environmental interventions are summarized to depict the ASD phenotypes seen in these models.

**References:**

- 1 Amodeo DA, Jones JH, Sweeney JA, Ragozzino ME (2012) Differences in BTBR T+ tf/J and C57BL/6J mice on probabilistic reversal learning and stereotyped behaviors. *Behav Brain Res* 227: 64-72 Doi [10.1016/j.bbr.2011.10.032](https://doi.org/10.1016/j.bbr.2011.10.032)
- 2 Bauman MD, Iosif AM, Ashwood P, Braunschweig D, Lee A, Schumann CM, Van de Water J, Amaral DG (2013) Maternal antibodies from mothers of children with autism alter brain growth and social behavior development in the rhesus monkey. *Transl Psychiatry* 3: e278 Doi [10.1038/tp.2013.47](https://doi.org/10.1038/tp.2013.47)
- 3 Bauman MD, Iosif AM, Smith SE, Bregere C, Amaral DG, Patterson PH (2014) Activation of the maternal immune system during pregnancy alters behavioral development of rhesus monkey offspring. *Biol Psychiatry* 75: 332-341 Doi [10.1016/j.biopsych.2013.06.025](https://doi.org/10.1016/j.biopsych.2013.06.025)
- 4 Bauman MD, Schumann CS (In press) Advances in nonhuman primate models of autism: integrating neuroscience and behavior. *Exp Neurol*:

- 5 Benson AD, Burket JA, Deutsch SI (2013) Balb/c mice treated with D-cycloserine arouse increased social interest in conspecifics. *Brain Res Bull* 99: 95-99 Doi [10.1016/j.brainresbull.2013.10.006](https://doi.org/10.1016/j.brainresbull.2013.10.006)
- 6 Bolivar VJ, Walters SR, Phoenix JL (2007) Assessing autism-like behavior in mice: variations in social interactions among inbred strains. *Behav Brain Res* 176: 21-26 Doi [10.1016/j.bbr.2006.09.007](https://doi.org/10.1016/j.bbr.2006.09.007)
- 7 Braunschweig D, Golub MS, Koenig CM, Qi L, Pessah IN, Van de Water J, Berman RF (2012) Maternal autism-associated IgG antibodies delay development and produce anxiety in a mouse gestational transfer model. *J Neuroimmunol* 252: 56-65 Doi [10.1016/j.jneuroim.2012.08.002](https://doi.org/10.1016/j.jneuroim.2012.08.002)
- 8 Brodtkin ES (2007) BALB/c mice: low sociability and other phenotypes that may be relevant to autism. *Behav Brain Res* 176: 53-65 Doi [10.1016/j.bbr.2006.06.025](https://doi.org/10.1016/j.bbr.2006.06.025)
- 9 Brodtkin ES, Hagemann A, Nemetski SM, Silver LM (2004) Social approach-avoidance behavior of inbred mouse strains towards DBA/2 mice. *Brain Res* 1002: 151-157 Doi [10.1016/j.brainres.2003.12.013](https://doi.org/10.1016/j.brainres.2003.12.013)
- 10 Camacho J, Jones K, Miller E, Ariza J, Noctor S, Van de Water J, Martínez-Cerdeño V (2014) Embryonic intraventricular exposure to autism-specific maternal autoantibodies produces alterations in autistic-like stereotypical behaviors in offspring mice. *Behav Brain Res* 266: 46-51 Doi [10.1016/j.bbr.2014.02.045](https://doi.org/10.1016/j.bbr.2014.02.045)
- 11 Dalton P, Deacon R, Blamire A, Pike M, McKinlay I, Stein J, Styles P, Vincent A (2003) Maternal neuronal antibodies associated with autism and a language disorder. *Ann Neurol* 53: 533-537 Doi [10.1002/ana.10557](https://doi.org/10.1002/ana.10557)
- 12 Fairless AH, Dow HC, Kreibich AS, Torre M, Kuruvilla M, Gordon E, Morton EA, Tan J, Berrettini WH, Li H, et al (2012) Sociability and brain development in BALB/cJ and C57BL/6J mice. *Behav Brain Res* 228: 299-310 Doi [10.1016/j.bbr.2011.12.001](https://doi.org/10.1016/j.bbr.2011.12.001)
- 13 Gandal MJ, Sisti J, Klook K, Ortinski PI, Leitman V, Liang Y, Thieu T, Anderson R, Pierce RC, Jonak G, et al (2012) GABAB-mediated rescue of altered excitatory-inhibitory balance, gamma synchrony and behavioral deficits following constitutive NMDAR-hypofunction. *Transl Psychiatry* 2: e142 Doi [10.1038/tp.2012.69](https://doi.org/10.1038/tp.2012.69)
- 14 Guariglia SR, Chadman KK (2013) Water T-maze: a useful assay for determination of repetitive behaviors in mice. *J Neurosci Methods* 220: 24-29 Doi [10.1016/j.jneumeth.2013.08.019](https://doi.org/10.1016/j.jneumeth.2013.08.019)
- 15 Kataoka S, Takuma K, Hara Y, Maeda Y, Ago Y, Matsuda T (2013) Autism-like behaviours with transient histone hyperacetylation in mice treated prenatally with valproic acid. *Int J Neuropsychopharmacol* 16: 91-103 Doi [10.1017/S1461145711001714](https://doi.org/10.1017/S1461145711001714)
- 16 Machado CJ, Whitaker AM, Smith SE, Patterson PH, Bauman MD (2015) Maternal immune activation in nonhuman primates alters social attention in juvenile offspring. *Biol Psychiatry* 77: 823-832 Doi [10.1016/j.biopsych.2014.07.035](https://doi.org/10.1016/j.biopsych.2014.07.035)
- 17 Malkova NV, Yu CZ, Hsiao EY, Moore MJ, Patterson PH (2012) Maternal immune activation yields offspring displaying mouse versions of the three core symptoms of autism. *Brain Behav Immun* 26: 607-616 Doi [10.1016/j.bbi.2012.01.011](https://doi.org/10.1016/j.bbi.2012.01.011)
- 18 Martin LA, Ashwood P, Braunschweig D, Cabanlit M, Van de Water J, Amaral DG (2008) Stereotypies and hyperactivity in rhesus monkeys exposed to IgG from mothers of children with autism. *Brain Behav Immun* 22: 806-816 Doi [10.1016/j.bbi.2007.12.007](https://doi.org/10.1016/j.bbi.2007.12.007)
- 19 McFarlane HG, Kusek GK, Yang M, Phoenix JL, Bolivar VJ, Crawley JN (2008) Autism-like behavioral phenotypes in BTBR T+tf/J mice. *Genes Brain Behav* 7: 152-163 Doi [10.1111/j.1601-183X.2007.00330.x](https://doi.org/10.1111/j.1601-183X.2007.00330.x)
- 20 Mehta MV, Gandal MJ, Siegel SJ (2011) mGluR5-antagonist mediated reversal of elevated stereotyped, repetitive behaviors in the VPA model of autism. *PLoS One* 6: e26077 Doi [10.1371/journal.pone.0026077](https://doi.org/10.1371/journal.pone.0026077)
- 21 Moy SS, Nadler JJ, Poe MD, Nonneman RJ, Young NB, Koller BH, Crawley JN, Duncan GE, Bodfish JW (2008) Development of a mouse test for repetitive, restricted behaviors: relevance to autism. *Behav Brain Res* 188: 178-194 Doi [10.1016/j.bbr.2007.10.029](https://doi.org/10.1016/j.bbr.2007.10.029)
- 22 Moy SS, Nadler JJ, Young NB, Nonneman RJ, Segall SK, Andrade GM, Crawley JN, Magnuson TR (2008) Social approach and repetitive behavior in eleven inbred mouse strains. *Behav Brain Res* 191: 118-129 Doi [10.1016/j.bbr.2008.03.015](https://doi.org/10.1016/j.bbr.2008.03.015)
- 23 Moy SS, Nadler JJ, Young NB, Perez A, Holloway LP, Barbaro RP, Barbaro JR, Wilson LM, Threadgill DW, Lauder JM, et al (2007) Mouse behavioral tasks relevant to autism: phenotypes of 10 inbred strains. *Behav Brain Res* 176: 4-20 Doi [10.1016/j.bbr.2006.07.030](https://doi.org/10.1016/j.bbr.2006.07.030)

- 24 Panksepp JB, Jochman KA, Kim JU, Koy JJ, Wilson ED, Chen Q, Wilson CR, Lahvis GP (2007) Affiliative behavior, ultrasonic communication and social reward are influenced by genetic variation in adolescent mice. *PLoS One* 2: e351 Doi [10.1371/journal.pone.0000351](https://doi.org/10.1371/journal.pone.0000351)
- 25 Pobbe RL, Pearson BL, Defensor EB, Bolivar VJ, Blanchard DC, Blanchard RJ (2010) Expression of social behaviors of C57BL/6J versus BTBR inbred mouse strains in the visible burrow system. *Behav Brain Res* 214: 443-449 Doi [10.1016/j.bbr.2010.06.025](https://doi.org/10.1016/j.bbr.2010.06.025)
- 26 Raza S, Harker A, Richards S, Kolb B, Gibb R (2015) Tactile stimulation improves neuroanatomical pathology but not behavior in rats prenatally exposed to valproic acid. *Behav Brain Res* 282: 25-36 Doi [10.1016/j.bbr.2014.12.055](https://doi.org/10.1016/j.bbr.2014.12.055)
- 27 Rouillet FI, Wohr M, Crawley JN (2011) Female urine-induced male mice ultrasonic vocalizations, but not scent-marking, is modulated by social experience. *Behav Brain Res* 216: 19-28 Doi [10.1016/j.bbr.2010.06.004](https://doi.org/10.1016/j.bbr.2010.06.004)
- 28 Scattoni ML, Gandhi SU, Ricceri L, Crawley JN (2008) Unusual repertoire of vocalizations in the BTBR T+tf/J mouse model of autism. *PLoS One* 3: e3067 Doi [10.1371/journal.pone.0003067](https://doi.org/10.1371/journal.pone.0003067)
- 29 Scattoni ML, Ricceri L, Crawley JN (2011) Unusual repertoire of vocalizations in adult BTBR T+tf/J mice during three types of social encounters. *Genes Brain Behav* 10: 44-56 Doi [10.1111/j.1601-183X.2010.00623.x](https://doi.org/10.1111/j.1601-183X.2010.00623.x)
- 30 Schneider T, Przewlocki R (2005) Behavioral alterations in rats prenatally exposed to valproic acid: animal model of autism. *Neuropsychopharmacology* 30: 80-89 Doi [10.1038/sj.npp.1300518](https://doi.org/10.1038/sj.npp.1300518)
- 31 Silverman JL, Smith DG, Rizzo SJ, Karras MN, Turner SM, Tolu SS, Bryce DK, Smith DL, Fonseca K, Ring RH, et al (2012) Negative allosteric modulation of the mGluR5 receptor reduces repetitive behaviors and rescues social deficits in mouse models of autism. *Sci Transl Med* 4: 131ra151 Doi [10.1126/scitranslmed.3003501](https://doi.org/10.1126/scitranslmed.3003501)
- 32 Silverman JL, Tolu SS, Barkan CL, Crawley JN (2010) Repetitive self-grooming behavior in the BTBR mouse model of autism is blocked by the mGluR5 antagonist MPEP. *Neuropsychopharmacology* 35: 976-989 Doi [10.1038/npp.2009.201](https://doi.org/10.1038/npp.2009.201)
- 33 Silverman JL, Yang M, Lord C, Crawley JN (2010) Behavioural phenotyping assays for mouse models of autism. *Nat Rev Neurosci* 11: 490-502 Doi [10.1038/nrn2851](https://doi.org/10.1038/nrn2851)
- 34 Wagner GC, Reuhl KR, Cheh M, McRae P, Halladay AK (2006) A new neurobehavioral model of autism in mice: pre- and postnatal exposure to sodium valproate. *J Autism Dev Disord* 36: 779-793 Doi [10.1007/s10803-006-0117-y](https://doi.org/10.1007/s10803-006-0117-y)
- 35 Yang M, Abrams DN, Zhang JY, Weber MD, Katz AM, Clarke AM, Silverman JL, Crawley JN (2012) Low sociability in BTBR T+tf/J mice is independent of partner strain. *Physiol Behav* 107: 649-662 Doi [10.1016/j.physbeh.2011.12.025](https://doi.org/10.1016/j.physbeh.2011.12.025)
- 36 Yang M, Clarke AM, Crawley JN (2009) Postnatal lesion evidence against a primary role for the corpus callosum in mouse sociability. *Eur J Neurosci* 29: 1663-1677 Doi [10.1111/j.1460-9568.2009.06714.x](https://doi.org/10.1111/j.1460-9568.2009.06714.x)
- 37 Yang M, Scattoni ML, Zhodzishsky V, Chen T, Caldwell H, Young WS, McFarlane HG, Crawley JN (2007) Social approach behaviors are similar on conventional versus reverse lighting cycles, and in replications across cohorts, in BTBR T+ tf/J, C57BL/6J, and vasopressin receptor 1B mutant mice. *Front Behav Neurosci* 1: 1 Doi [10.3389/neuro.08.001.2007](https://doi.org/10.3389/neuro.08.001.2007)
- 38 Yang M, Zhodzishsky V, Crawley JN (2007) Social deficits in BTBR T+tf/J mice are unchanged by cross-fostering with C57BL/6J mothers. *Int J Dev Neurosci* 25: 515-521 Doi [10.1016/j.ijdevneu.2007.09.008](https://doi.org/10.1016/j.ijdevneu.2007.09.008)

For the convenience of the readers we provide here the full references, including the titles, of the literature cited in the main paper as an abbreviated list.

## References:

- 1 Abrahams BS, Geschwind DH (2008) Advances in autism genetics: on the threshold of a new neurobiology. *Nat Rev Genet* 9: 341-355 Doi [10.1038/nrg2346](https://doi.org/10.1038/nrg2346)
- 2 Aceti M, Creson TK, Vaissiere T, Rojas C, Huang WC, Wang YX, Petralia RS, Page DT, Miller CA, Rumbaugh G (2015) Syngap1 haploinsufficiency damages a postnatal critical period of pyramidal cell structural maturation linked to cortical circuit assembly. *Biol Psychiatry* 77: 805-815 Doi [10.1016/j.biopsych.2014.08.001](https://doi.org/10.1016/j.biopsych.2014.08.001)
- 3 Akashi K, Kakizaki T, Kamiya H, Fukaya M, Yamasaki M, Abe M, Natsume R, Watanabe M, Sakimura K (2009) NMDA receptor GluN2B (GluR epsilon 2/NR2B) subunit is crucial for channel function, postsynaptic macromolecular organization, and actin cytoskeleton at hippocampal CA3 synapses. *J Neurosci* 29: 10869-10882 Doi [10.1523/JNEUROSCI.5531-08.2009](https://doi.org/10.1523/JNEUROSCI.5531-08.2009)
- 4 Allman J, Hakeem A, Watson K (2002) Two phylogenetic specializations in the human brain. *Neuroscientist* 8: 335-346
- 5 Allman JM, Tetreault NA, Hakeem AY, Manaye KF, Semendeferi K, Erwin JM, Goubert V, Hof PR (2010) The von Economo neurons in fronto-insular and anterior cingulate cortex of great apes and humans. *Brain Struct Funct* 214: 495-517
- 6 Allman JM, Watson KK, Tetreault NA, Hakeem AY (2005) Intuition and autism: a possible role for Von Economo neurons. *Trends Cogn Sci* 9: 367-373
- 7 Altemeier WA, Altemeier LE (2009) How can early, intensive training help a genetic disorder? *Pediatr Ann* 38: 167-170, 172
- 8 Diagnostic and statistical manual of mental disorders: DSM-5™. (2013) American Psychiatric Publishing, Inc., Arlington, VA, US
- 9 Anderson GR, Galfin T, Xu W, Aoto J, Malenka RC, Südhof TC (2012) Candidate autism gene screen identifies critical role for cell-adhesion molecule CASPR2 in dendritic arborization and spine development. *Proc Natl Acad Sci U S A* 109: 18120-18125 Doi [10.1073/pnas.1216398109](https://doi.org/10.1073/pnas.1216398109)
- 10 Antshel KM, Aneja A, Strunge L, Peebles J, Fremont WP, Stallone K, Abdulsabur N, Higgins AM, Shprintzen RJ, Kates WR (2007) Autistic spectrum disorders in velo-cardio facial syndrome (22q11.2 deletion). *J Autism Dev Disord* 37: 1776-1786 Doi [10.1007/s10803-006-0308-6](https://doi.org/10.1007/s10803-006-0308-6)
- 11 Araki Y, Zeng M, Zhang M, Hagan RL (2015) Rapid dispersion of SynGAP from synaptic spines triggers AMPA receptor insertion and spine enlargement during LTP. *Neuron* 85: 173-189 Doi [10.1016/j.neuron.2014.12.023](https://doi.org/10.1016/j.neuron.2014.12.023)
- 12 Ariza J, Rogers H, Hashemi E, Noctor SC, Martínez-Cerdeño V (2016) The number of chandelier and basket cells are differentially decreased in prefrontal cortex in autism. *Cereb Cortex*: Doi [10.1093/cercor/bhw349](https://doi.org/10.1093/cercor/bhw349)
- 13 Armstrong D, Dunn JK, Antalffy B, Trivedi R (1995) Selective dendritic alterations in the cortex of Rett syndrome. *J Neuropathol Exp Neurol* 54: 195-201
- 14 Atladóttir HO, Thorsen P, Østergaard L, Schendel DE, Lemcke S, Abdallah M, Parner ET (2010) Maternal infection requiring hospitalization during pregnancy and autism spectrum disorders. *J Autism Dev Disord* 40: 1423-1430 Doi [10.1007/s10803-010-1006-y](https://doi.org/10.1007/s10803-010-1006-y)
- 15 Azmitia EC, Saccomano ZT, Alzoobae MF, Boldrini M, Whitaker-Azmitia PM (2016) Persistent angiogenesis in the autism brain: an immunocytochemical study of postmortem cortex, brainstem and cerebellum. *J Autism Dev Disord* 46: 1307-1318 Doi [10.1007/s10803-015-2672-6](https://doi.org/10.1007/s10803-015-2672-6)
- 16 Azmitia EC, Singh JS, Hou XP, Wegiel J (2011) Dystrophic serotonin axons in postmortem brains from young autism patients. *Anat Rec (Hoboken)* 294: 1653-1662 Doi [10.1002/ar.21243](https://doi.org/10.1002/ar.21243)
- 17 Azmitia EC, Singh JS, Whitaker-Azmitia PM (2011) Increased serotonin axons (immunoreactive to 5-HT transporter) in postmortem brains from young autism donors. *Neuropharmacology* 60: 1347-1354 Doi [10.1016/j.neuropharm.2011.02.002](https://doi.org/10.1016/j.neuropharm.2011.02.002)
- 18 Bagni C, Tassone F, Neri G, Hagerman R (2012) Fragile X syndrome: causes, diagnosis, mechanisms, and therapeutics. *J Clin Invest* 122: 4314-4322 Doi [10.1172/JCI63141](https://doi.org/10.1172/JCI63141)
- 19 Bailey A, Luthert P, Dean A, Harding B, Janota I, Montgomery M, Rutter M, Lantos P (1998) A clinicopathological study of autism. *Brain* 121 (Pt 5): 889-905
- 20 Baker K, Chaddock CA, Baldeweg T, Skuse D (2011) Neuroanatomy in adolescents and young adults with 22q11 deletion syndrome: comparison to an IQ-matched group. *Neuroimage* 55: 491-499 Doi [10.1016/j.neuroimage.2010.12.041](https://doi.org/10.1016/j.neuroimage.2010.12.041)

- 21 Barnea-Goraly N, Kwon H, Menon V, Eliez S, Lotspeich L, Reiss AL (2004) White matter structure in autism: preliminary evidence from diffusion tensor imaging. *Biol Psychiatry* 55: 323-326 Doi [S000632230301151X](https://doi.org/10.1016/j.biopsych.2003.11.011) [pii]
- 22 Barnes SA, Wijetunge LS, Jackson AD, Katsanevaki D, Osterweil EK, Komiyama NH, Grant SG, Bear MF, Nagerl UV, Kind PC, et al (2015) Convergence of hippocampal pathophysiology in Syngap<sup>+/-</sup> and Fmr1<sup>-/y</sup> Mice. *J Neurosci* 35: 15073-15081 Doi [10.1523/JNEUROSCI.1087-15.2015](https://doi.org/10.1523/JNEUROSCI.1087-15.2015)
- 23 Bauman M, Kemper TL (1985) Histoanatomic observations of the brain in early infantile autism. *Neurology* 35: 866-874
- 24 Bauman MD, Iosif AM, Ashwood P, Braunschweig D, Lee A, Schumann CM, Van de Water J, Amaral DG (2013) Maternal antibodies from mothers of children with autism alter brain growth and social behavior development in the rhesus monkey. *Transl Psychiatry* 3: e278 Doi [10.1038/tp.2013.47](https://doi.org/10.1038/tp.2013.47)
- 25 Bauman ML, Kemper TL, Arin DM (1995) Pervasive neuroanatomic abnormalities of the brain in three cases of Rett's syndrome. *Neurology* 45: 1581-1586
- 26 Beal JC (2014) Case report: Neuronal migration disorder associated with chromosome 15q13.3 duplication in a boy with autism and seizures. *J Child Neurol* 29: NP186-188 Doi [10.1177/0883073813510356](https://doi.org/10.1177/0883073813510356)
- 27 Bearden CE, van Erp TG, Dutton RA, Tran H, Zimmermann L, Sun D, Geaga JA, Simon TJ, Glahn DC, Cannon TD, et al (2007) Mapping cortical thickness in children with 22q11.2 deletions. *Cereb Cortex* 17: 1889-1898 Doi [10.1093/cercor/bhl097](https://doi.org/10.1093/cercor/bhl097)
- 28 Bedogni F, Hodge RD, Elsen GE, Nelson BR, Daza RA, Beyer RP, Bammler TK, Rubenstein JL, Hevner RF (2010) Tbr1 regulates regional and laminar identity of postmitotic neurons in developing neocortex. *Proc Natl Acad Sci U S A* 107: 13129-13134 Doi [10.1073/pnas.1002285107](https://doi.org/10.1073/pnas.1002285107)
- 29 Belichenko PV, Oldfors A, Hagberg B, Dahlstrom A (1994) Rett syndrome: 3-D confocal microscopy of cortical pyramidal dendrites and afferents. *Neuroreport* 5: 1509-1513
- 30 Belichenko PV, Wright EE, Belichenko NP, Masliah E, Li HH, Mobley WC, Francke U (2009) Widespread changes in dendritic and axonal morphology in Mecp2-mutant mouse models of Rett syndrome: evidence for disruption of neuronal networks. *J Comp Neurol* 514: 240-258 Doi [10.1002/cne.22009](https://doi.org/10.1002/cne.22009)
- 31 Bellone C, Nicoll RA (2007) Rapid bidirectional switching of synaptic NMDA receptors. *Neuron* 55: 779-785 Doi [10.1016/j.neuron.2007.07.035](https://doi.org/10.1016/j.neuron.2007.07.035)
- 32 Bernier R, Golzio C, Xiong B, Stessman HA, Coe BP, Penn O, Witherspoon K, Gerdtz J, Baker C, Vulto-van Silfhout AT, et al (2014) Disruptive CHD8 mutations define a subtype of autism early in development. *Cell* 158: 263-276 Doi [10.1016/j.cell.2014.06.017](https://doi.org/10.1016/j.cell.2014.06.017)
- 33 Berryer MH, Chattopadhyaya B, Xing P, Riebe I, Bosoi C, Sanon N, Antoine-Bertrand J, Levesque M, Avoli M, Hamdan FF, et al (2016) Decrease of SYNGAP1 in GABAergic cells impairs inhibitory synapse connectivity, synaptic inhibition and cognitive function. *Nat Commun* 7: 13340 Doi [10.1038/ncomms13340](https://doi.org/10.1038/ncomms13340)
- 34 Blackmon K, Ben-Avi E, Wang X, Pardoe HR, Di Martino A, Halgren E, Devinsky O, Thesen T, Kuzniecky R (2016) Periventricular white matter abnormalities and restricted repetitive behavior in autism spectrum disorder. *Neuroimage Clin* 10: 36-45 Doi [10.1016/j.nicl.2015.10.017](https://doi.org/10.1016/j.nicl.2015.10.017)
- 35 Blatt GJ (2005) GABAergic cerebellar system in autism: a neuropathological and developmental perspective. *Int Rev Neurobiol* 71: 167-178
- 36 Boer K, Troost D, Jansen F, Nellist M, van den Ouweland AM, Geurts JJ, Spliet WG, Crino P, Aronica E (2008) Clinicopathological and immunohistochemical findings in an autopsy case of tuberous sclerosis complex. *Neuropathology* 28: 577-590 Doi [10.1111/j.1440-1789.2008.00920.x](https://doi.org/10.1111/j.1440-1789.2008.00920.x)
- 37 Bolliger MF, Pei J, Maxeiner S, Boucard AA, Grishin NV, Südhof TC (2008) Unusually rapid evolution of Neuroigin-4 in mice. *Proc Natl Acad Sci U S A* 105: 6421-6426 Doi [10.1073/pnas.0801383105](https://doi.org/10.1073/pnas.0801383105)
- 38 Bolte S, Hubl D, Feineis-Matthews S, Prvulovic D, Dierks T, Poustka F (2006) Facial affect recognition training in autism: can we animate the fusiform gyrus? *Behav Neurosci* 120: 211-216 Doi [10.1037/0735-7044.120.1.211](https://doi.org/10.1037/0735-7044.120.1.211)
- 39 Bozdagi O, Sakurai T, Papapetrou D, Wang XB, Dickstein DL, Takahashi N, Kajiwara Y, Yang M, Katz AM, Scattoni ML, et al (2010) Haploinsufficiency of the autism-associated Shank3 gene leads to deficits in synaptic function, social interaction, and social communication. *Mol Autism* 1: Doi [10.1186/2040-2392-1-15](https://doi.org/10.1186/2040-2392-1-15)
- 40 Braunschweig D, Ashwood P, Krakowiak P, Hertz-Picciotto I, Hansen R, Croen LA, Pessah IN, Van de Water J (2008) Autism: maternally derived antibodies specific for fetal brain proteins. *Neurotoxicology* 29: 226-231 Doi [10.1016/j.neuro.2007.10.010](https://doi.org/10.1016/j.neuro.2007.10.010)
- 41 Brigman JL, Wright T, Talani G, Prasad-Mulcare S, Jinde S, Seabold GK, Mathur P, Davis MI, Bock R, Gustin RM, et al (2010) Loss of GluN2B-containing NMDA receptors in CA1 hippocampus and cortex impairs long-term depression, reduces dendritic spine density, and disrupts learning. *J Neurosci* 30: 4590-4600 Doi [10.1523/JNEUROSCI.0640-10.2010](https://doi.org/10.1523/JNEUROSCI.0640-10.2010)
- 42 Bringas ME, Carvajal-Flores FN, Lopez-Ramirez TA, Atzori M, Flores G (2013) Rearrangement of the dendritic morphology in limbic regions and altered exploratory behavior in a rat model of autism spectrum disorder. *Neuroscience* 241: 170-187 Doi [10.1016/j.neuroscience.2013.03.030](https://doi.org/10.1016/j.neuroscience.2013.03.030)

- 43 Broca P (1861) Remarques sur le siège de la faculté du langage articulé; suivies d'une observation daphémie (perte de la parole). *Bull Mem Soc Anat Paris* 36: 330–357
- 44 Bromley RL, Mawer G, Clayton-Smith J, Baker GA, Liverpool, Manchester Neurodevelopment G (2008) Autism spectrum disorders following in utero exposure to antiepileptic drugs. *Neurology* 71: 1923-1924 Doi [10.1212/01.wnl.0000339399.64213.1a](https://doi.org/10.1212/01.wnl.0000339399.64213.1a)
- 45 Brown WS, Paul LK, Symington M, Dietrich R (2005) Comprehension of humor in primary agenesis of the corpus callosum. *Neuropsychologia* 43: 906-916 Doi [10.1016/j.neuropsychologia.2004.09.008](https://doi.org/10.1016/j.neuropsychologia.2004.09.008)
- 46 Buxhoeveden DP, Semendeferi K, Buckwalter J, Schenker N, Switzer R, Courchesne E (2006) Reduced minicolumns in the frontal cortex of patients with autism. *Neuropathol Appl Neurobiol* 32: 483-491 Doi [10.1111/j.1365-2990.2006.00745.x](https://doi.org/10.1111/j.1365-2990.2006.00745.x)
- 47 Cahill L, Babinsky R, Markowitsch HJ, McGaugh JL (1995) The amygdala and emotional memory. *Nature* 377: 295-296 Doi [10.1038/377295a0](https://doi.org/10.1038/377295a0)
- 48 Camacho J, Ejaz E, Ariza J, Noctor SC, Martínez-Cerdeño V (2014) RELN-expressing neuron density in layer I of the superior temporal lobe is similar in human brains with autism and in age-matched controls. *Neurosci Lett* 579: 163-167 Doi [10.1016/j.neulet.2014.07.031](https://doi.org/10.1016/j.neulet.2014.07.031)
- 49 Campbell LE, Daly E, Toal F, Stevens A, Azuma R, Catani M, Ng V, van Amelsvoort T, Chitnis X, Cutter W, et al (2006) Brain and behaviour in children with 22q11.2 deletion syndrome: a volumetric and voxel-based morphometry MRI study. *Brain* 129: 1218-1228 Doi [10.1093/brain/awl066](https://doi.org/10.1093/brain/awl066)
- 50 Canovas J, Berndt FA, Sepulveda H, Aguilar R, Veloso FA, Montecino M, Oliva C, Maass JC, Sierralta J, Kukuljan M (2015) The specification of cortical subcerebral projection neurons depends on the direct repression of TBR1 by CTIP1/BCL11a. *J Neurosci* 35: 7552-7564 Doi [10.1523/JNEUROSCI.0169-15.2015](https://doi.org/10.1523/JNEUROSCI.0169-15.2015)
- 51 Carlisle HJ, Manzerra P, Marcora E, Kennedy MB (2008) SynGAP regulates steady-state and activity-dependent phosphorylation of cofilin. *J Neurosci* 28: 13673-13683 Doi [10.1523/JNEUROSCI.4695-08.2008](https://doi.org/10.1523/JNEUROSCI.4695-08.2008)
- 52 Carper RA, Courchesne E (2005) Localized enlargement of the frontal cortex in early autism. *Biol Psychiatry* 57: 126-133 Doi [10.1016/j.biopsych.2004.11.005](https://doi.org/10.1016/j.biopsych.2004.11.005)
- 53 Carper RA, Moses P, Tigue ZD, Courchesne E (2002) Cerebral lobes in autism: early hyperplasia and abnormal age effects. *Neuroimage* 16: 1038-1051 Doi [S1053811902910992](https://doi.org/S1053811902910992) [pii]
- 54 Casanova MF (2006) Neuropathological and genetic findings in autism: the significance of a putative minicolumnopathy. *Neuroscientist* 12: 435-441 Doi [10.1177/1073858406290375](https://doi.org/10.1177/1073858406290375)
- 55 Casanova MF, Buxhoeveden DP, Brown C (2002) Clinical and macroscopic correlates of minicolumnar pathology in autism. *J Child Neurol* 17: 692-695
- 56 Casanova MF, Buxhoeveden DP, Switala AE, Roy E (2002) Asperger's syndrome and cortical neuropathology. *J Child Neurol* 17: 142-145
- 57 Casanova MF, Buxhoeveden DP, Switala AE, Roy E (2002) Minicolumnar pathology in autism. *Neurology* 58: 428-432
- 58 Casanova MF, Buxhoeveden DP, Switala AE, Roy E (2002) Neuronal density and architecture (Gray Level Index) in the brains of autistic patients. *J Child Neurol* 17: 515-521
- 59 Casanova MF, El-Baz AS, Kamat SS, Dombroski BA, Khalifa F, Elnakib A, Soliman A, Allison-McNutt A, Switala AE (2013) Focal cortical dysplasias in autism spectrum disorders. *Acta Neuropathol Commun* 1: 67 Doi [10.1186/2051-5960-1-67](https://doi.org/10.1186/2051-5960-1-67)
- 60 Caspers J, Zilles K, Amunts K, Laird AR, Fox PT, Eickhoff SB (2014) Functional characterization and differential coactivation patterns of two cytoarchitectonic visual areas on the human posterior fusiform gyrus. *Hum Brain Mapp* 35: 2754-2767 Doi [10.1002/hbm.22364](https://doi.org/10.1002/hbm.22364)
- 61 Caspers J, Zilles K, Eickhoff SB, Schleicher A, Mohlberg H, Amunts K (2013) Cytoarchitectonical analysis and probabilistic mapping of two extrastriate areas of the human posterior fusiform gyrus. *Brain Struct Funct* 218: 511-526 Doi [10.1007/s00429-012-0411-8](https://doi.org/10.1007/s00429-012-0411-8)
- 62 Chanda S, Aoto J, Lee SJ, Wernig M, Südhof TC (2016) Pathogenic mechanism of an autism-associated neuroligin mutation involves altered AMPA-receptor trafficking. *Mol Psychiatry* 21: 169-177 Doi [10.1038/mp.2015.20](https://doi.org/10.1038/mp.2015.20)
- 63 Chao HT, Zoghbi HY, Rosenmund C (2007) MeCP2 controls excitatory synaptic strength by regulating glutamatergic synapse number. *Neuron* 56: 58-65 Doi [10.1016/j.neuron.2007.08.018](https://doi.org/10.1016/j.neuron.2007.08.018)
- 64 Chapleau CA, Boggio EM, Calfa G, Percy AK, Giustetto M, Pozzo-Miller L (2012) Hippocampal CA1 pyramidal neurons of Mecp2 mutant mice show a dendritic spine phenotype only in the presymptomatic stage. *Neural Plast* 2012: 976164 Doi [10.1155/2012/976164](https://doi.org/10.1155/2012/976164)

- 65 Chapleau CA, Calfa GD, Lane MC, Albertson AJ, Larimore JL, Kudo S, Armstrong DL, Percy AK, Pozzo-Miller L (2009) Dendritic spine pathologies in hippocampal pyramidal neurons from Rett syndrome brain and after expression of Rett-associated MECP2 mutations. *Neurobiol Dis* 35: 219-233 Doi [10.1016/j.nbd.2009.05.001](https://doi.org/10.1016/j.nbd.2009.05.001)
- 66 Chen HJ, Rojas-Soto M, Oguni A, Kennedy MB (1998) A synaptic Ras-GTPase activating protein (p135 SynGAP) inhibited by CaM kinase II. *Neuron* 20: 895-904
- 67 Chen RZ, Akbarian S, Tudor M, Jaenisch R (2001) Deficiency of methyl-CpG binding protein-2 in CNS neurons results in a Rett-like phenotype in mice. *Nat Genet* 27: 327-331 Doi [10.1038/85906](https://doi.org/10.1038/85906)
- 68 Christensen DL, Baio J, Braun KV, Bilder D, Charles J, Constantino JN, Daniels J, Durkin MS, Fitzgerald RT, Kurzius-Spencer M, et al (2016) Prevalence and characteristics of autism spectrum disorder among children aged 8 Years - autism and developmental disabilities monitoring network, 11 Sites, United States, 2012. *MMWR Surveill Summ* 65: 1-23 Doi [10.15585/mmwr.ss6503a1](https://doi.org/10.15585/mmwr.ss6503a1)
- 69 Christensen J, Gronborg TK, Sorensen MJ, Schendel D, Parner ET, Pedersen LH, Vestergaard M (2013) Prenatal valproate exposure and risk of autism spectrum disorders and childhood autism. *JAMA* 309: 1696-1703 Doi [10.1001/jama.2013.2270](https://doi.org/10.1001/jama.2013.2270)
- 70 Chu-Shore CJ, Frosch MP, Grant PE, Thiele EA (2009) Progressive multifocal cystlike cortical tubers in tuberous sclerosis complex: Clinical and neuropathologic findings. *Epilepsia* 50: 2648-2651 Doi [10.1111/j.1528-1167.2009.02193.x](https://doi.org/10.1111/j.1528-1167.2009.02193.x)
- 71 Chuang HC, Huang TN, Hsueh YP (2014) Neuronal excitation upregulates Tbr1, a high-confidence risk gene of autism, mediating Grin2b expression in the adult brain. *Front Cell Neurosci* 8: 280 Doi [10.3389/fncel.2014.00280](https://doi.org/10.3389/fncel.2014.00280)
- 72 Clement JP, Aceti M, Creson TK, Ozkan ED, Shi Y, Reish NJ, Almonte AG, Miller BH, Wiltgen BJ, Miller CA, et al (2012) Pathogenic SYNGAP1 mutations impair cognitive development by disrupting maturation of dendritic spine synapses. *Cell* 151: 709-723 Doi [10.1016/j.cell.2012.08.045](https://doi.org/10.1016/j.cell.2012.08.045)
- 73 Codagnone MG, Podesta MF, Uccelli NA, Reines A (2015) Differential local connectivity and neuroinflammation profiles in the medial prefrontal cortex and hippocampus in the valproic acid rat model of autism. *Dev Neurosci* 37: 215-231 Doi [10.1159/000375489](https://doi.org/10.1159/000375489)
- 74 Comery TA, Harris JB, Willems PJ, Oostra BA, Irwin SA, Weiler IJ, Greenough WT (1997) Abnormal dendritic spines in fragile X knockout mice: maturation and pruning deficits. *Proc Natl Acad Sci U S A* 94: 5401-5404
- 75 Committee on Children with Disabilities 2000-2001 (2001) Developmental surveillance and screening of infants and young children. *Pediatrics* 108: 192-196
- 76 Courchesne E, Campbell K, Solso S (2011) Brain growth across the life span in autism: Age-specific changes in anatomical pathology. *Brain Res* 1380: 138-145 Doi [10.1016/j.brainres.2010.09.101](https://doi.org/10.1016/j.brainres.2010.09.101)
- 77 Courchesne E, Mouton PR, Calhoun ME, Semendeferi K, Ahrens-Barbeau C, Hallet MJ, Barnes CC, Pierce K (2011) Neuron number and size in prefrontal cortex of children with autism. *JAMA* 306: 2001-2010 Doi [10.1001/jama.2011.1638](https://doi.org/10.1001/jama.2011.1638)
- 78 Cruz-Martín A, Crespo M, Portera-Cailliau C (2010) Delayed stabilization of dendritic spines in fragile X mice. *J Neurosci* 30: 7793-7803 Doi [10.1523/JNEUROSCI.0577-10.2010](https://doi.org/10.1523/JNEUROSCI.0577-10.2010)
- 79 Cruz-Martín A, Crespo M, Portera-Cailliau C (2012) Glutamate induces the elongation of early dendritic protrusions via mGluRs in wild type mice, but not in fragile X mice. *PLoS One* 7: e32446 Doi [10.1371/journal.pone.0032446](https://doi.org/10.1371/journal.pone.0032446)
- 80 Darnell JC, Van Driesche SJ, Zhang C, Hung KY, Mele A, Fraser CE, Stone EF, Chen C, Fak JJ, Chi SW, et al (2011) FMRP stalls ribosomal translocation on mRNAs linked to synaptic function and autism. *Cell* 146: 247-261 Doi [10.1016/j.cell.2011.06.013](https://doi.org/10.1016/j.cell.2011.06.013)
- 81 De Rubeis S, Buxbaum JD (2015) Genetics and genomics of autism spectrum disorder: embracing complexity. *Hum Mol Genet* 24: R24-31 Doi [10.1093/hmg/ddv273](https://doi.org/10.1093/hmg/ddv273)
- 82 De Rubeis S, Buxbaum JD (2015) Recent advances in the genetics of autism spectrum disorder. *Curr Neurol Neurosci Rep* 15: 36 Doi [10.1007/s11910-015-0553-1](https://doi.org/10.1007/s11910-015-0553-1)
- 83 De Rubeis S, He X, Goldberg AP, Poultney CS, Samocha K, Cicek AE, Kou Y, Liu L, Fromer M, Walker S, et al (2014) Synaptic, transcriptional and chromatin genes disrupted in autism. *Nature* 515: 209-215 Doi [10.1038/nature13772](https://doi.org/10.1038/nature13772)
- 84 Debbane M, Schaer M, Farhoumand R, Glaser B, Eliez S (2006) Hippocampal volume reduction in 22q11.2 deletion syndrome. *Neuropsychologia* 44: 2360-2365 Doi [10.1016/j.neuropsychologia.2006.05.006](https://doi.org/10.1016/j.neuropsychologia.2006.05.006)

- 85 Deboer T, Wu Z, Lee A, Simon TJ (2007) Hippocampal volume reduction in children with chromosome 22q11.2 deletion syndrome is associated with cognitive impairment. *Behav Brain Funct* 3: 54 Doi [10.1186/1744-9081-3-54](https://doi.org/10.1186/1744-9081-3-54)
- 86 Dindot SV, Antalffy BA, Bhattacharjee MB, Beaudet AL (2008) The Angelman syndrome ubiquitin ligase localizes to the synapse and nucleus, and maternal deficiency results in abnormal dendritic spine morphology. *Hum Mol Genet* 17: 111-118 Doi [10.1093/hmg/ddm288](https://doi.org/10.1093/hmg/ddm288)
- 87 Doderio L, Damiano M, Galbusera A, Bifone A, Tsaftaris SA, Scattoni ML, Gozzi A (2013) Neuroimaging evidence of major morpho-anatomical and functional abnormalities in the BTBR T+TF/J mouse model of autism. *PLoS One* 8: e76655 Doi [10.1371/journal.pone.0076655](https://doi.org/10.1371/journal.pone.0076655)
- 88 Doyle CA, McDougale CJ (2012) Pharmacologic treatments for the behavioral symptoms associated with autism spectrum disorders across the lifespan. *Dialogues Clin Neurosci* 14: 263-279
- 89 Dudanova I, Tabuchi K, Rohlmann A, Südhof TC, Missler M (2007) Deletion of alpha-neurexins does not cause a major impairment of axonal pathfinding or synapse formation. *J Comp Neurol* 502: 261-274 Doi [10.1002/cne.21305](https://doi.org/10.1002/cne.21305)
- 90 Duffney LJ, Zhong P, Wei J, Matas E, Cheng J, Qin L, Ma K, Dietz DM, Kajiwara Y, Buxbaum JD, et al (2015) Autism-like deficits in Shank3-deficient mice are rescued by targeting actin regulators. *Cell Rep* 11: 1400-1413 Doi [10.1016/j.celrep.2015.04.064](https://doi.org/10.1016/j.celrep.2015.04.064)
- 91 Durak O, Gao F, Kaeser-Woo YJ, Rueda R, Martorell AJ, Nott A, Liu CY, Watson LA, Tsai LH (2016) Chd8 mediates cortical neurogenesis via transcriptional regulation of cell cycle and Wnt signaling. *Nat Neurosci* 19: 1477-1488 Doi [10.1038/nn.4400](https://doi.org/10.1038/nn.4400)
- 92 Earls LR, Bayazitov IT, Fricke RG, Berry RB, Illingworth E, Mittleman G, Zakharenko SS (2010) Dysregulation of presynaptic calcium and synaptic plasticity in a mouse model of 22q11 deletion syndrome. *J Neurosci* 30: 15843-15855 Doi [10.1523/JNEUROSCI.1425-10.2010](https://doi.org/10.1523/JNEUROSCI.1425-10.2010)
- 93 Easton CR, Dickey CW, Moen SP, Neuzil KE, Barger Z, Anderson TM, Moody WJ, Hevner RF (2016) Distinct calcium signals in developing cortical interneurons persist despite disorganization of cortex by Tbr1 KO. *Dev Neurobiol* 76: 705-720 Doi [10.1002/dneu.22354](https://doi.org/10.1002/dneu.22354)
- 94 Edalatmanesh MA, Nikfarjam H, Vafaei F, Moghadas M (2013) Increased hippocampal cell density and enhanced spatial memory in the valproic acid rat model of autism. *Brain Res* 1526: 15-25 Doi [10.1016/j.brainres.2013.06.024](https://doi.org/10.1016/j.brainres.2013.06.024)
- 95 Eilam-Stock T, Xu P, Cao M, Gu X, Van Dam NT, Anagnostou E, Kolevzon A, Soorya L, Park Y, Siller M, et al (2014) Abnormal autonomic and associated brain activities during rest in autism spectrum disorder. *Brain* 137: 153-171 Doi [10.1093/brain/awt294](https://doi.org/10.1093/brain/awt294)
- 96 Ellegood J, Babineau BA, Henkelman RM, Lerch JP, Crawley JN (2013) Neuroanatomical analysis of the BTBR mouse model of autism using magnetic resonance imaging and diffusion tensor imaging. *Neuroimage* 70: 288-300 Doi [10.1016/j.neuroimage.2012.12.029](https://doi.org/10.1016/j.neuroimage.2012.12.029)
- 97 Ellegood J, Lerch JP, Henkelman RM (2011) Brain abnormalities in a Neuroligin3 R451C knockin mouse model associated with autism. *Autism Res* 4: 368-376 Doi [10.1002/aur.215](https://doi.org/10.1002/aur.215)
- 98 Ellegood J, Nakai N, Nakatani J, Henkelman M, Takumi T, Lerch J (2015) Neuroanatomical phenotypes are consistent with autism-like behavioral phenotypes in the 15q11-13 duplication mouse model. *Autism Res* 8: 545-555 Doi [10.1002/aur.1469](https://doi.org/10.1002/aur.1469)
- 99 Etherton M, Foldy C, Sharma M, Tabuchi K, Liu X, Shamloo M, Malenka RC, Südhof TC (2011) Autism-linked neuroligin-3 R451C mutation differentially alters hippocampal and cortical synaptic function. *Proc Natl Acad Sci U S A* 108: 13764-13769 Doi [10.1073/pnas.1111093108](https://doi.org/10.1073/pnas.1111093108)
- 100 Etherton MR, Tabuchi K, Sharma M, Ko J, Südhof TC (2011) An autism-associated point mutation in the neuroligin cytoplasmic tail selectively impairs AMPA receptor-mediated synaptic transmission in hippocampus. *EMBO J* 30: 2908-2919 Doi [10.1038/emboj.2011.182](https://doi.org/10.1038/emboj.2011.182)
- 101 Fairhall SL, Ishai A (2007) Effective connectivity within the distributed cortical network for face perception. *Cereb Cortex* 17: 2400-2406 Doi [10.1093/cercor/bhl148](https://doi.org/10.1093/cercor/bhl148)
- 102 Fairless AH, Dow HC, Kreibich AS, Torre M, Kuruvilla M, Gordon E, Morton EA, Tan J, Berrettini WH, Li H, et al (2012) Sociability and brain development in BALB/cJ and C57BL/6J mice. *Behav Brain Res* 228: 299-310 Doi [10.1016/j.bbr.2011.12.001](https://doi.org/10.1016/j.bbr.2011.12.001)
- 103 Fairless AH, Dow HC, Toledo MM, Malkus KA, Edelmann M, Li H, Talbot K, Arnold SE, Abel T, Brodtkin ES (2008) Low sociability is associated with reduced size of the corpus callosum in the BALB/cJ inbred mouse strain. *Brain Res* 1230: 211-217 Doi [10.1016/j.brainres.2008.07.025](https://doi.org/10.1016/j.brainres.2008.07.025)
- 104 Fajardo C, Escobar MI, Buritica E, Arteaga G, Umbarila J, Casanova MF, Pimienta H (2008) Von Economo neurons are present in the dorsolateral (dysgranular) prefrontal cortex of humans. *Neurosci Lett* 435: 215-218 Doi [10.1016/j.neulet.2008.02.048](https://doi.org/10.1016/j.neulet.2008.02.048)
- 105 Fan J, Bernardi S, Van Dam NT, Anagnostou E, Gu X, Martin L, Park Y, Liu X, Kolevzon A, Soorya L, et al (2012) Functional deficits of the attentional networks in autism. *Brain Behav* 2: 647-660 Doi [10.1002/brb3.90](https://doi.org/10.1002/brb3.90)

- 106 Fan J, Gu X, Liu X, Guise KG, Park Y, Martin L, de Marchena A, Tang CY, Minzenberg MJ, Hof PR (2011) Involvement of the anterior cingulate and fronto-insular cortices in rapid processing of salient facial emotional information. *Neuroimage* 54: 2539-2546 Doi [10.1016/j.neuroimage.2010.10.007](https://doi.org/10.1016/j.neuroimage.2010.10.007)
- 107 Fan J, Hof PR, Guise KG, Fossella JA, Posner MI (2008) The functional integration of the anterior cingulate cortex during conflict processing. *Cereb Cortex* 18: 796-805 Doi [10.1093/cercor/bhm125](https://doi.org/10.1093/cercor/bhm125)
- 108 Fatemi SH, Halt AR, Realmuto G, Earle J, Kist DA, Thuras P, Merz A (2002) Purkinje cell size is reduced in cerebellum of patients with autism. *Cell Mol Neurobiol* 22: 171-175
- 109 Feliciano DM, Quon JL, Su T, Taylor MM, Bordey A (2012) Postnatal neurogenesis generates heterotopias, olfactory micronodules and cortical infiltration following single-cell Tsc1 deletion. *Hum Mol Genet* 21: 799-810 Doi [10.1093/hmg/ddr511](https://doi.org/10.1093/hmg/ddr511)
- 110 Feliciano DM, Su T, Lopez J, Platel JC, Bordey A (2011) Single-cell Tsc1 knockout during corticogenesis generates tuber-like lesions and reduces seizure threshold in mice. *J Clin Invest* 121: 1596-1607 Doi [10.1172/JCI44909](https://doi.org/10.1172/JCI44909)
- 111 Fenelon K, Mukai J, Xu B, Hsu PK, Drew LJ, Karayiorgou M, Fischbach GD, Macdermott AB, Gogos JA (2011) Deficiency of Dgcr8, a gene disrupted by the 22q11.2 microdeletion, results in altered short-term plasticity in the prefrontal cortex. *Proc Natl Acad Sci U S A* 108: 4447-4452 Doi [10.1073/pnas.1101219108](https://doi.org/10.1073/pnas.1101219108)
- 112 Fenelon K, Xu B, Lai CS, Mukai J, Markx S, Stark KL, Hsu PK, Gan WB, Fischbach GD, MacDermott AB, et al (2013) The pattern of cortical dysfunction in a mouse model of a schizophrenia-related microdeletion. *J Neurosci* 33: 14825-14839 Doi [10.1523/JNEUROSCI.1611-13.2013](https://doi.org/10.1523/JNEUROSCI.1611-13.2013)
- 113 Fombonne E (2003) The prevalence of autism. *JAMA* 289: 87-89 Doi [jed20080](https://doi.org/10.1001/jama.289.1.87) [pii]
- 114 Frazier TW, Hardan AY (2009) A meta-analysis of the corpus callosum in autism. *Biol Psychiatry* 66: 935-941 Doi [10.1016/j.biopsych.2009.07.022](https://doi.org/10.1016/j.biopsych.2009.07.022)
- 115 Fukuda T, Itoh M, Ichikawa T, Washiyama K, Goto Y (2005) Delayed maturation of neuronal architecture and synaptogenesis in cerebral cortex of Mecp2-deficient mice. *J Neuropathol Exp Neurol* 64: 537-544
- 116 Fuster JM (2001) The prefrontal cortex--an update: time is of the essence. *Neuron* 30: 319-333 Doi [S0896-6273\(01\)00285-9](https://doi.org/10.1016/S0896-6273(01)00285-9) [pii]
- 117 Galvez R, Gopal AR, Greenough WT (2003) Somatosensory cortical barrel dendritic abnormalities in a mouse model of the fragile X mental retardation syndrome. *Brain Res* 971: 83-89
- 118 Galvez R, Greenough WT (2005) Sequence of abnormal dendritic spine development in primary somatosensory cortex of a mouse model of the fragile X mental retardation syndrome. *Am J Med Genet A* 135: 155-160 Doi [10.1002/ajmg.a.30709](https://doi.org/10.1002/ajmg.a.30709)
- 119 Gaugler T, Klei L, Sanders SJ, Bodea CA, Goldberg AP, Lee AB, Mahajan M, Manaa D, Pawitan Y, Reichert J, et al (2014) Most genetic risk for autism resides with common variation. *Nat Genet* 46: 881-885 Doi [10.1038/ng.3039](https://doi.org/10.1038/ng.3039)
- 120 Gazina EV, Leaw BT, Richards KL, Wimmer VC, Kim TH, Aumann TD, Featherby TJ, Churilov L, Hammond VE, Reid CA, et al (2015) 'Neonatal' Nav1.2 reduces neuronal excitability and affects seizure susceptibility and behaviour. *Hum Mol Genet* 24: 1457-1468 Doi [10.1093/hmg/ddu562](https://doi.org/10.1093/hmg/ddu562)
- 121 Gazina EV, Richards KL, Mokhtar MB, Thomas EA, Reid CA, Petrou S (2010) Differential expression of exon 5 splice variants of sodium channel alpha subunit mRNAs in the developing mouse brain. *Neuroscience* 166: 195-200 Doi [10.1016/j.neuroscience.2009.12.011](https://doi.org/10.1016/j.neuroscience.2009.12.011)
- 122 Gdalyahu A, Lazaro M, Peñagarikano O, Golshani P, Trachtenberg JT, Geschwind DH (2015) The autism related protein Contactin-Associated Protein-Like 2 (CNTNAP2) stabilizes new spines: an in vivo mouse study. *PLoS One* 10: e0125633 Doi [10.1371/journal.pone.0125633](https://doi.org/10.1371/journal.pone.0125633)
- 123 George J, Baden DG, Gerwick WH, Murray TF (2012) Bidirectional influence of sodium channel activation on NMDA receptor-dependent cerebrocortical neuron structural plasticity. *Proc Natl Acad Sci U S A* 109: 19840-19845 Doi [10.1073/pnas.1212584109](https://doi.org/10.1073/pnas.1212584109)
- 124 George J, Dravid SM, Prakash A, Xie J, Peterson J, Jabba SV, Baden DG, Murray TF (2009) Sodium channel activation augments NMDA receptor function and promotes neurite outgrowth in immature cerebrocortical neurons. *J Neurosci* 29: 3288-3301 Doi [10.1523/JNEUROSCI.6104-08.2009](https://doi.org/10.1523/JNEUROSCI.6104-08.2009)
- 125 Gillberg C (1991) The treatment of epilepsy in autism. *J Autism Dev Disord* 21: 61-77
- 126 Goffin D, Allen M, Zhang L, Amorim M, Wang IT, Reyes AR, Mercado-Berton A, Ong C, Cohen S, Hu L, et al (2012) Rett syndrome mutation MeCP2 T158A disrupts DNA binding, protein stability and ERP responses. *Nat Neurosci* 15: 274-283 Doi [10.1038/nn.2997](https://doi.org/10.1038/nn.2997)
- 127 Gogolla N, Leblanc JJ, Quast KB, Südhof TC, Fagiolini M, Hensch TK (2009) Common circuit defect of excitatory-inhibitory balance in mouse models of autism. *J Neurodev Disord* 1: 172-181 Doi [10.1007/s11689-009-9023-x](https://doi.org/10.1007/s11689-009-9023-x)
- 128 Greco CM, Navarro CS, Hunsaker MR, Maezawa I, Shuler JF, Tassone F, Delany M, Au JW, Berman RF, Jin LW, et al (2011) Neuropathologic features in the hippocampus and cerebellum of three older men with fragile X syndrome. *Mol Autism* 2: 2 Doi [10.1186/2040-2392-2-2](https://doi.org/10.1186/2040-2392-2-2)

- 129 Grossman AW, Aldridge GM, Lee KJ, Zeman MK, Jun CS, Azam HS, Arii T, Imoto K, Greenough WT, Rhyu IJ (2010) Developmental characteristics of dendritic spines in the dentate gyrus of Fmr1 knockout mice. *Brain Res* 1355: 221-227 Doi [10.1016/j.brainres.2010.07.090](https://doi.org/10.1016/j.brainres.2010.07.090)
- 130 Grossman AW, Elisseou NM, McKinney BC, Greenough WT (2006) Hippocampal pyramidal cells in adult Fmr1 knockout mice exhibit an immature-appearing profile of dendritic spines. *Brain Res* 1084: 158-164 Doi [10.1016/j.brainres.2006.02.044](https://doi.org/10.1016/j.brainres.2006.02.044)
- 131 Gu X, Eilam-Stock T, Zhou T, Anagnostou E, Kolevzon A, Soorya L, Hof PR, Friston KJ, Fan J (2015) Autonomic and brain responses associated with empathy deficits in autism spectrum disorder. *Hum Brain Mapp* 36: 3323-3338 Doi [10.1002/hbm.22840](https://doi.org/10.1002/hbm.22840)
- 132 Gu X, Hof PR, Friston KJ, Fan J (2013) Anterior insular cortex and emotional awareness. *J Comp Neurol* 521: 3371-3388 Doi [10.1002/cne.23368](https://doi.org/10.1002/cne.23368)
- 133 Gu X, Liu X, Van Dam NT, Hof PR, Fan J (2013) Cognition-emotion integration in the anterior insular cortex. *Cereb Cortex* 23: 20-27 Doi [10.1093/cercor/bhr367](https://doi.org/10.1093/cercor/bhr367)
- 134 Guo YP, Commons KG (2017) Serotonin neuron abnormalities in the BTBR mouse model of autism. *Autism Res* 10: 66-77 Doi [10.1002/aur.1665](https://doi.org/10.1002/aur.1665)
- 135 Gutstein SE (2009) Empowering families through Relationship Development Intervention: an important part of the biopsychosocial management of autism spectrum disorders. *Ann Clin Psychiatry* 21: 174-182 Doi [acp\\_2103d](https://doi.org/10.1002/acp.2103d) [pii]
- 136 Haar S, Berman S, Behrmann M, Dinstein I (2016) Anatomical abnormalities in autism? *Cereb Cortex* 26: 1440-1452 Doi [10.1093/cercor/bhu242](https://doi.org/10.1093/cercor/bhu242)
- 137 Hadjikhani N, Joseph RM, Snyder J, Chabris CF, Clark J, Steele S, McGrath L, Vangel M, Aharon I, Feczko E, et al (2004) Activation of the fusiform gyrus when individuals with autism spectrum disorder view faces. *Neuroimage* 22: 1141-1150 Doi [10.1016/j.neuroimage.2004.03.025](https://doi.org/10.1016/j.neuroimage.2004.03.025)
- 138 Hagerman R, Hoem G, Hagerman P (2010) Fragile X and autism: Intertwined at the molecular level leading to targeted treatments. *Mol Autism* 1: 12 Doi [10.1186/2040-2392-1-12](https://doi.org/10.1186/2040-2392-1-12)
- 139 Hallmayer J, Cleveland S, Torres A, Phillips J, Cohen B, Torigoe T, Miller J, Fedele A, Collins J, Smith K, et al (2011) Genetic heritability and shared environmental factors among twin pairs with autism. *Arch Gen Psychiatry* 68: 1095-1102 Doi [10.1001/archgenpsychiatry.2011.76](https://doi.org/10.1001/archgenpsychiatry.2011.76)
- 140 Hammer M, Krueger-Burg D, Tuffy LP, Cooper BH, Taschenberger H, Goswami SP, Ehrenreich H, Jonas P, Varoqueaux F, Rhee JS, et al (2015) Perturbed hippocampal synaptic inhibition and gamma-oscillations in a Neuroligin-4 knockout mouse model of autism. *Cell Rep* 13: 516-523 Doi [10.1016/j.celrep.2015.09.011](https://doi.org/10.1016/j.celrep.2015.09.011)
- 141 Han K, Holder JL, Jr., Schaaf CP, Lu H, Chen H, Kang H, Tang J, Wu Z, Hao S, Cheung SW, et al (2013) SHANK3 overexpression causes manic-like behaviour with unique pharmacogenetic properties. *Nature* 503: 72-77 Doi [10.1038/nature12630](https://doi.org/10.1038/nature12630)
- 142 Han W, Kwan KY, Shim S, Lam MM, Shin Y, Xu X, Zhu Y, Li M, Sestan N (2011) TBR1 directly represses Fezf2 to control the laminar origin and development of the corticospinal tract. *Proc Natl Acad Sci U S A* 108: 3041-3046 Doi [10.1073/pnas.1016723108](https://doi.org/10.1073/pnas.1016723108)
- 143 Hardan AY, Libove RA, Keshavan MS, Melhem NM, Minshew NJ (2009) A preliminary longitudinal magnetic resonance imaging study of brain volume and cortical thickness in autism. *Biol Psychiatry* 66: 320-326 Doi [10.1016/j.biopsych.2009.04.024](https://doi.org/10.1016/j.biopsych.2009.04.024)
- 144 Harlow EG, Till SM, Russell TA, Wijetunge LS, Kind P, Contractor A (2010) Critical period plasticity is disrupted in the barrel cortex of FMR1 knockout mice. *Neuron* 65: 385-398 Doi [10.1016/j.neuron.2010.01.024](https://doi.org/10.1016/j.neuron.2010.01.024)
- 145 Harony-Nicolas H, De Rubeis S, Kolevzon A, Buxbaum JD (2015) Phelan McDermid syndrome: From genetic discoveries to animal models and treatment. *J Child Neurol* 30: 1861-1870 Doi [10.1177/0883073815600872](https://doi.org/10.1177/0883073815600872)
- 146 Harting I, Seitz A, Rating D, Sartor K, Zschocke J, Janssen B, Ebinger F, Wolf NI (2009) Abnormal myelination in Angelman syndrome. *Eur J Paediatr Neurol* 13: 271-276 Doi [10.1016/j.ejpn.2008.04.005](https://doi.org/10.1016/j.ejpn.2008.04.005)
- 147 Hashemi E, Ariza J, Lechpammer M, Noctor SC, Martínez-Cerdeño V (2016) Abnormal white matter tracts resembling pencil fibers involving prefrontal cortex (Brodmann area 47) in autism: a case report. *J Med Case Rep* 10: 237 Doi [10.1186/s13256-016-1020-6](https://doi.org/10.1186/s13256-016-1020-6)
- 148 Hashemi E, Ariza J, Rogers H, Noctor SC, Martínez-Cerdeño V (2016) The number of parvalbumin-expressing interneurons is decreased in the medial prefrontal cortex in autism. *Cereb Cortex*: Doi [10.1093/cercor/bhw021](https://doi.org/10.1093/cercor/bhw021)
- 149 Haxby JV, Hoffman EA, Gobbini MI (2000) The distributed human neural system for face perception. *Trends Cogn Sci* 4: 223-233 Doi [S1364-6613\(00\)01482-0](https://doi.org/10.1016/S1364-6613(00)01482-0) [pii]
- 150 Hayashi M, Itoh M, Kabasawa Y, Hayashi H, Satoh J, Morimatsu Y (1992) A neuropathological study of a case of the Prader-Willi syndrome with an interstitial deletion of the proximal long arm of chromosome 15. *Brain Dev* 14: 58-62

- 151 Hazlett HC, Gu H, Munsell BC, Kim SH, Styner M, Wolff JJ, Elison JT, Swanson MR, Zhu H, Botteron KN, et al (2017) Early brain development in infants at high risk for autism spectrum disorder. *Nature* 542: 348-351 Doi [10.1038/nature21369](https://doi.org/10.1038/nature21369)
- 152 Hazlett HC, Poe MD, Gerig G, Styner M, Chappell C, Smith RG, Vachet C, Piven J (2011) Early brain overgrowth in autism associated with an increase in cortical surface area before age 2 years. *Arch Gen Psychiatry* 68: 467-476 Doi [10.1001/archgenpsychiatry.2011.39](https://doi.org/10.1001/archgenpsychiatry.2011.39)
- 153 Hanzledar MM, Buchsbaum MS, Wei TC, Hof PR, Cartwright C, Bienstock CA, Hollander E (2000) Limbic circuitry in patients with autism spectrum disorders studied with positron emission tomography and magnetic resonance imaging. *Am J Psychiatry* 157: 1994-2001
- 154 He H, Kise Y, Izadifar A, Urwyler O, Ayaz D, Parthasarathy A, Yan B, Erfurth ML, Dascenco D, Schmucker D (2014) Cell-intrinsic requirement of Dscam1 isoform diversity for axon collateral formation. *Science* 344: 1182-1186 Doi [10.1126/science.1251852](https://doi.org/10.1126/science.1251852)
- 155 Hering H, Sheng M (2001) Dendritic spines: structure, dynamics and regulation. *Nat Rev Neurosci* 2: 880-888 Doi [10.1038/35104061](https://doi.org/10.1038/35104061)
- 156 Hevner RF, Miyashita-Lin E, Rubenstein JL (2002) Cortical and thalamic axon pathfinding defects in Tbr1, Gbx2, and Pax6 mutant mice: evidence that cortical and thalamic axons interact and guide each other. *J Comp Neurol* 447: 8-17 Doi [10.1002/cne.10219](https://doi.org/10.1002/cne.10219)
- 157 Hevner RF, Shi L, Justice N, Hsueh Y, Sheng M, Smiga S, Bulfone A, Goffinet AM, Campagnoni AT, Rubenstein JL (2001) Tbr1 regulates differentiation of the preplate and layer 6. *Neuron* 29: 353-366
- 158 Hinton VJ, Brown WT, Wisniewski K, Rudelli RD (1991) Analysis of neocortex in three males with the fragile X syndrome. *Am J Med Genet* 41: 289-294 Doi [10.1002/ajmg.1320410306](https://doi.org/10.1002/ajmg.1320410306)
- 159 Horev G, Ellegood J, Lerch JP, Son YE, Muthuswamy L, Vogel H, Krieger AM, Buja A, Henkelman RM, Wigler M, et al (2011) Dosage-dependent phenotypes in models of 16p11.2 lesions found in autism. *Proc Natl Acad Sci U S A* 108: 17076-17081 Doi [10.1073/pnas.1114042108](https://doi.org/10.1073/pnas.1114042108)
- 160 Horsthemke B, Wagstaff J (2008) Mechanisms of imprinting of the Prader-Willi/Angelman region. *Am J Med Genet A* 146A: 2041-2052 Doi [10.1002/ajmg.a.32364](https://doi.org/10.1002/ajmg.a.32364)
- 161 Huang TN, Chuang HC, Chou WH, Chen CY, Wang HF, Chou SJ, Hsueh YP (2014) Tbr1 haploinsufficiency impairs amygdalar axonal projections and results in cognitive abnormality. *Nat Neurosci* 17: 240-247 Doi [10.1038/nn.3626](https://doi.org/10.1038/nn.3626)
- 162 Hutsler JJ, Zhang H (2010) Increased dendritic spine densities on cortical projection neurons in autism spectrum disorders. *Brain Res* 1309: 83-94 Doi [10.1016/j.brainres.2009.09.120](https://doi.org/10.1016/j.brainres.2009.09.120)
- 163 Huttenlocher PR, Wollmann RL (1991) Cellular neuropathology of tuberous sclerosis. *Ann N Y Acad Sci* 615: 140-148
- 164 Ingram JL, Peckham SM, Tisdale B, Rodier PM (2000) Prenatal exposure of rats to valproic acid reproduces the cerebellar anomalies associated with autism. *Neurotoxicol Teratol* 22: 319-324
- 165 Iossifov I, O'Roak BJ, Sanders SJ, Ronemus M, Krumm N, Levy D, Stessman HA, Witherspoon KT, Vives L, Patterson KE, et al (2014) The contribution of de novo coding mutations to autism spectrum disorder. *Nature* 515: 216-221 Doi [10.1038/nature13908](https://doi.org/10.1038/nature13908)
- 166 Iossifov I, Ronemus M, Levy D, Wang Z, Hakker I, Rosenbaum J, Yamrom B, Lee YH, Narzisi G, Leotta A, et al (2012) De novo gene disruptions in children on the autistic spectrum. *Neuron* 74: 285-299 Doi [10.1016/j.neuron.2012.04.009](https://doi.org/10.1016/j.neuron.2012.04.009)
- 167 Irwin SA, Galvez R, Greenough WT (2000) Dendritic spine structural anomalies in fragile-X mental retardation syndrome. *Cereb Cortex* 10: 1038-1044
- 168 Irwin SA, Idupulapati M, Gilbert ME, Harris JB, Chakravarti AB, Rogers EJ, Crisostomo RA, Larsen BP, Mehta A, Alcantara CJ, et al (2002) Dendritic spine and dendritic field characteristics of layer V pyramidal neurons in the visual cortex of fragile-X knockout mice. *Am J Med Genet* 111: 140-146 Doi [10.1002/ajmg.10500](https://doi.org/10.1002/ajmg.10500)
- 169 Irwin SA, Patel B, Idupulapati M, Harris JB, Crisostomo RA, Larsen BP, Kooy F, Willems PJ, Cras P, Kozlowski PB, et al (2001) Abnormal dendritic spine characteristics in the temporal and visual cortices of patients with fragile-X syndrome: a quantitative examination. *Am J Med Genet* 98: 161-167 Doi [10.1002/1096-8628\(20010115\)98:2%3C161::AID-AJMG1025%3E3.0.CO;2-B](https://doi.org/10.1002/1096-8628(20010115)98:2%3C161::AID-AJMG1025%3E3.0.CO;2-B) [pii]
- 170 Ishai A (2007) Sex, beauty and the orbitofrontal cortex. *Int J Psychophysiol* 63: 181-185 Doi [10.1016/j.ijpsycho.2006.03.010](https://doi.org/10.1016/j.ijpsycho.2006.03.010)
- 171 Ishai A, Haxby JV, Ungerleider LG (2002) Visual imagery of famous faces: effects of memory and attention revealed by fMRI. *Neuroimage* 17: 1729-1741 Doi [S1053811902913303](https://doi.org/10.1006/nimg.2002.13303) [pii]
- 172 Isshiki M, Tanaka S, Kuriu T, Tabuchi K, Takumi T, Okabe S (2014) Enhanced synapse remodelling as a common phenotype in mouse models of autism. *Nat Commun* 5: 4742 Doi [10.1038/ncomms5742](https://doi.org/10.1038/ncomms5742)

- 173 Jacot-Descombes S, Uppal N, Wicinski B, Santos M, Schmeidler J, Giannakopoulos P, Heinsen H, Schmitz C, Hof PR (2012) Decreased pyramidal neuron size in Brodmann areas 44 and 45 in patients with autism. *Acta Neuropathol* 124: 67-79 Doi [10.1007/s00401-012-0976-6](https://doi.org/10.1007/s00401-012-0976-6)
- 174 Jamain S, Quach H, Betancur C, Rastam M, Colineaux C, Gillberg IC, Soderstrom H, Giros B, Leboyer M, Gillberg C, et al (2003) Mutations of the X-linked genes encoding neuroligins NLGN3 and NLGN4 are associated with autism. *Nat Genet* 34: 27-29 Doi [10.1038/ng1136](https://doi.org/10.1038/ng1136)
- 175 Jamain S, Radyushkin K, Hammerschmidt K, Granon S, Boretius S, Varoqueaux F, Ramanantsoa N, Gallego J, Ronnenberg A, Winter D, et al (2008) Reduced social interaction and ultrasonic communication in a mouse model of monogenic heritable autism. *Proc Natl Acad Sci U S A* 105: 1710-1715 Doi [10.1073/pnas.0711555105](https://doi.org/10.1073/pnas.0711555105)
- 176 Jay V, Becker LE, Chan FW, Perry TL, Sr. (1991) Puppet-like syndrome of Angelman: a pathologic and neurochemical study. *Neurology* 41: 416-422
- 177 Jellinger K, Seitelberger F (1986) Neuropathology of Rett syndrome. *Am J Med Genet Suppl* 1: 259-288
- 178 Jentarra GM, Olfers SL, Rice SG, Srivastava N, Homanics GE, Blue M, Naidu S, Narayanan V (2010) Abnormalities of cell packing density and dendritic complexity in the Mecp2 A140V mouse model of Rett syndrome/X-linked mental retardation. *BMC Neurosci* 11: 19 Doi [10.1186/1471-2202-11-19](https://doi.org/10.1186/1471-2202-11-19)
- 179 Jiang H, Jiang W, Zou J, Wang B, Yu M, Pan Y, Lin Y, Mao Y, Wang Y (2015) The GluN2B subunit of N-methyl-D-aspartate receptor regulates the radial migration of cortical neurons in vivo. *Brain Res* 1610: 20-32 Doi [10.1016/j.brainres.2015.03.031](https://doi.org/10.1016/j.brainres.2015.03.031)
- 180 Jiang M, Ash RT, Baker SA, Suter B, Ferguson A, Park J, Rudy J, Torsky SP, Chao HT, Zoghbi HY, et al (2013) Dendritic arborization and spine dynamics are abnormal in the mouse model of MECP2 duplication syndrome. *J Neurosci* 33: 19518-19533 Doi [10.1523/JNEUROSCI.1745-13.2013](https://doi.org/10.1523/JNEUROSCI.1745-13.2013)
- 181 Jiang YH, Armstrong D, Albrecht U, Atkins CM, Noebels JL, Eichele G, Sweatt JD, Beaudet AL (1998) Mutation of the Angelman ubiquitin ligase in mice causes increased cytoplasmic p53 and deficits of contextual learning and long-term potentiation. *Neuron* 21: 799-811 Doi [S0896-6273\(00\)80596-6](https://doi.org/S0896-6273(00)80596-6) [pii]
- 182 Jones EG (1986) Connectivity of the primate sensory-motor cortex. In: Jones EG, Peters A (eds) *Cerebral cortex: Sensory-motor areas and aspects of cortical connectivity*. Plenum, New York, pp 113-183
- 183 Ka M, Chopra DA, Dravid SM, Kim WY (2016) Essential roles for ARID1B in dendritic arborization and spine morphology of developing pyramidal neurons. *J Neurosci* 36: 2723-2742 Doi [10.1523/JNEUROSCI.2321-15.2016](https://doi.org/10.1523/JNEUROSCI.2321-15.2016)
- 184 Kadam SD, French BM, Kim ST, Morris-Berry CM, Zimmerman AW, Blue ME, Singer HS (2013) Altered postnatal cell proliferation in brains of mouse pups prenatally exposed to IgG from mothers of children with autistic disorder. *J Exp Neurosci* 7: 93-99 Doi [10.4137/JEN.S12979](https://doi.org/10.4137/JEN.S12979)
- 185 Kanwisher N, Stanley D, Harris A (1999) The fusiform face area is selective for faces not animals. *Neuroreport* 10: 183-187
- 186 Kataoka S, Takuma K, Hara Y, Maeda Y, Ago Y, Matsuda T (2013) Autism-like behaviours with transient histone hyperacetylation in mice treated prenatally with valproic acid. *Int J Neuropsychopharmacol* 16: 91-103 Doi [10.1017/S1461145711001714](https://doi.org/10.1017/S1461145711001714)
- 187 Katayama Y, Nishiyama M, Shoji H, Ohkawa Y, Kawamura A, Sato T, Suyama M, Takumi T, Miyakawa T, Nakayama KI (2016) CHD8 haploinsufficiency results in autistic-like phenotypes in mice. *Nature* 537: 675-679 Doi [10.1038/nature19357](https://doi.org/10.1038/nature19357)
- 188 Kaufman JA, Paul LK, Manaye KF, Granstedt AE, Hof PR, Hakeem AY, Allman JM (2008) Selective reduction of Von Economo neuron number in agenesis of the corpus callosum. *Acta Neuropathol* 116: 479-489 Doi [10.1007/s00401-008-0434-7](https://doi.org/10.1007/s00401-008-0434-7)
- 189 Kazlauskas N, Campolongo M, Lucchina L, Zappala C, Depino AM (2016) Postnatal behavioral and inflammatory alterations in female pups prenatally exposed to valproic acid. *Psychoneuroendocrinology* 72: 11-21 Doi [10.1016/j.psyneuen.2016.06.001](https://doi.org/10.1016/j.psyneuen.2016.06.001)
- 190 Kearney JA, Plummer NW, Smith MR, Kapur J, Cummins TR, Waxman SG, Goldin AL, Meisler MH (2001) A gain-of-function mutation in the sodium channel gene *Scn2a* results in seizures and behavioral abnormalities. *Neuroscience* 102: 307-317
- 191 Kemper TL, Bauman ML (1993) The contribution of neuropathologic studies to the understanding of autism. *Neurol Clin* 11: 175-187
- 192 Kennedy DP, Semendeferi K, Courchesne E (2007) No reduction of spindle neuron number in fronto-insular cortex in autism. *Brain Cogn* 64: 124-129
- 193 Kiehl TR, Chow EW, Mikulis DJ, George SR, Bassett AS (2009) Neuropathologic features in adults with 22q11.2 deletion syndrome. *Cereb Cortex* 19: 153-164 Doi [10.1093/cercor/bhn066](https://doi.org/10.1093/cercor/bhn066)
- 194 Kim E, Camacho J, Combs Z, Ariza J, Lechpammer M, Noctor SC, Martínez-Cerdeño V (2015) Preliminary findings suggest the number and volume of supragranular and infragranular pyramidal neurons are similar in the anterior superior temporal area of control subjects and subjects with autism. *Neurosci Lett* 589: 98-103 Doi [10.1016/j.neulet.2015.01.021](https://doi.org/10.1016/j.neulet.2015.01.021)
- 195 Kim EJ, Sidhu M, Gaus SE, Huang EJ, Hof PR, Miller BL, DeArmond SJ, Seeley WW (2012) Selective fronto-insular von Economo neuron and fork cell loss in early behavioral variant frontotemporal dementia. *Cereb Cortex* 22: 251-259 Doi [10.1093/cercor/bhr004](https://doi.org/10.1093/cercor/bhr004)

- 196 Kim H, Kunz PA, Mooney R, Philpot BD, Smith SL (2016) Maternal loss of Ube3a impairs experience-driven dendritic spine maintenance in the developing visual cortex. *J Neurosci* 36: 4888-4894 Doi [10.1523/JNEUROSCI.4204-15.2016](https://doi.org/10.1523/JNEUROSCI.4204-15.2016)
- 197 Kim JH, Liao D, Lau LF, Haganir RL (1998) SynGAP: a synaptic RasGAP that associates with the PSD-95/SAP90 protein family. *Neuron* 20: 683-691
- 198 Kim KC, Choi CS, Kim JW, Han SH, Cheong JH, Ryu JH, Shin CY (2016) MeCP2 modulates sex differences in the postsynaptic development of the valproate animal model of autism. *Mol Neurobiol* 53: 40-56 Doi [10.1007/s12035-014-8987-z](https://doi.org/10.1007/s12035-014-8987-z)
- 199 Kim KC, Kim P, Go HS, Choi CS, Park JH, Kim HJ, Jeon SJ, Dela Pena IC, Han SH, Cheong JH, et al (2013) Male-specific alteration in excitatory post-synaptic development and social interaction in pre-natal valproic acid exposure model of autism spectrum disorder. *J Neurochem* 124: 832-843 Doi [10.1111/jnc.12147](https://doi.org/10.1111/jnc.12147)
- 200 Kishi N, Macklis JD (2004) MECP2 is progressively expressed in post-migratory neurons and is involved in neuronal maturation rather than cell fate decisions. *Mol Cell Neurosci* 27: 306-321 Doi [10.1016/j.mcn.2004.07.006](https://doi.org/10.1016/j.mcn.2004.07.006)
- 201 Klemmer P, Meredith RM, Holmgren CD, Klychnikov OI, Stahl-Zeng J, Loos M, van der Schors RC, Wortel J, de Wit H, Spijker S, et al (2011) Proteomics, ultrastructure, and physiology of hippocampal synapses in a fragile X syndrome mouse model reveal presynaptic phenotype. *J Biol Chem* 286: 25495-25504 Doi [10.1074/jbc.M110.210260](https://doi.org/10.1074/jbc.M110.210260)
- 202 Kloth AD, Badura A, Li A, Cherskov A, Connolly SG, Giovannucci A, Bangash MA, Grasselli G, Peñagarikano O, Piochon C, et al (2015) Cerebellar associative sensory learning defects in five mouse autism models. *Elife* 4: e06085 Doi [10.7554/eLife.06085](https://doi.org/10.7554/eLife.06085)
- 203 Koegel RL, Shirotova L, Koegel LK (2009) Brief report: using individualized orienting cues to facilitate first-word acquisition in non-responders with autism. *J Autism Dev Disord* 39: 1587-1592 Doi [10.1007/s10803-009-0765-9](https://doi.org/10.1007/s10803-009-0765-9)
- 204 Kogan JH, Gross AK, Featherstone RE, Shin R, Chen Q, Heusner CL, Adachi M, Lin A, Walton NM, Miyoshi S, et al (2015) Mouse model of chromosome 15q13.3 microdeletion syndrome demonstrates features related to autism spectrum disorder. *J Neurosci* 35: 16282-16294 Doi [10.1523/JNEUROSCI.3967-14.2015](https://doi.org/10.1523/JNEUROSCI.3967-14.2015)
- 205 Kotagiri P, Chance SA, Szele FG, Esiri MM (2014) Subventricular zone cytoarchitecture changes in autism. *Dev Neurobiol* 74: 25-41 Doi [10.1002/dneu.22127](https://doi.org/10.1002/dneu.22127)
- 206 Kouser M, Speed HE, Dewey CM, Reimers JM, Widman AJ, Gupta N, Liu S, Jaramillo TC, Bangash M, Xiao B, et al (2013) Loss of predominant Shank3 isoforms results in hippocampus-dependent impairments in behavior and synaptic transmission. *J Neurosci* 33: 18448-18468 Doi [10.1523/JNEUROSCI.3017-13.2013](https://doi.org/10.1523/JNEUROSCI.3017-13.2013)
- 207 Kulesza RJ, Mangunay K (2008) Morphological features of the medial superior olive in autism. *Brain Res* 1200: 132-137 Doi [10.1016/j.brainres.2008.01.009](https://doi.org/10.1016/j.brainres.2008.01.009)
- 208 Kutsuwada T, Sakimura K, Manabe T, Takayama C, Katakura N, Kushiya E, Natsume R, Watanabe M, Inoue Y, Yagi T, et al (1996) Impairment of suckling response, trigeminal neuronal pattern formation, and hippocampal LTD in NMDA receptor epsilon 2 subunit mutant mice. *Neuron* 16: 333-344
- 209 Kyriakides T, Hallam LA, Hockey A, Silberstein P, Kakulas BA (1992) Angelman's syndrome: a neuropathological study. *Acta Neuropathol* 83: 675-678
- 210 Lassi G, Priano L, Maggi S, Garcia-Garcia C, Balzani E, El-Assawy N, Pagani M, Tinarelli F, Giardino D, Mauro A, et al (2016) Deletion of the Snord116/SNORD116 Alters Sleep in Mice and Patients with Prader-Willi Syndrome. *Sleep* 39: 637-644 Doi [10.5665/sleep.5542](https://doi.org/10.5665/sleep.5542)
- 211 Lawrence YA, Kemper TL, Bauman ML, Blatt GJ (2010) Parvalbumin-, calbindin-, and calretinin-immunoreactive hippocampal interneuron density in autism. *Acta Neurol Scand* 121: 99-108 Doi [10.1111/j.1600-0404.2009.01234.x](https://doi.org/10.1111/j.1600-0404.2009.01234.x)
- 212 LeDoux J (2007) The amygdala. *Curr Biol* 17: R868-874 Doi [10.1016/j.cub.2007.08.005](https://doi.org/10.1016/j.cub.2007.08.005)
- 213 Lee HJ, Dreyfus C, DiCicco-Bloom E (2016) Valproic acid stimulates proliferation of glial precursors during cortical gliogenesis in developing rat. *Dev Neurobiol* 76: 780-798 Doi [10.1002/dneu.22359](https://doi.org/10.1002/dneu.22359)
- 214 Levenga J, de Vrij FM, Buijsen RA, Li T, Nieuwenhuizen IM, Pop A, Oostra BA, Willemsen R (2011) Subregion-specific dendritic spine abnormalities in the hippocampus of Fmr1 KO mice. *Neurobiol Learn Mem* 95: 467-472 Doi [10.1016/j.nlm.2011.02.009](https://doi.org/10.1016/j.nlm.2011.02.009)
- 215 Li H, Zhao P, Xu Q, Shan S, Hu C, Qiu Z, Xu X (2016) The autism-related gene SNRPN regulates cortical and spine development via controlling nuclear receptor Nr4a1. *Sci Rep* 6: 29878 Doi [10.1038/srep29878](https://doi.org/10.1038/srep29878)
- 216 Li S, Sukeena JM, Simmons AB, Hansen EJ, Nuhn RE, Samuels IS, Fuerst PG (2015) DSCAM promotes refinement in the mouse retina through cell death and restriction of exploring dendrites. *J Neurosci* 35: 5640-5654 Doi [10.1523/JNEUROSCI.2202-14.2015](https://doi.org/10.1523/JNEUROSCI.2202-14.2015)

- 217 Li W, Xu X, Pozzo-Miller L (2016) Excitatory synapses are stronger in the hippocampus of Rett syndrome mice due to altered synaptic trafficking of AMPA-type glutamate receptors. *Proc Natl Acad Sci U S A*: Doi [10.1073/pnas.1517244113](https://doi.org/10.1073/pnas.1517244113)
- 218 Liakakis G, Nickel J, Seitz RJ (2011) Diversity of the inferior frontal gyrus--a meta-analysis of neuroimaging studies. *Behav Brain Res* 225: 341-347 Doi [10.1016/j.bbr.2011.06.022](https://doi.org/10.1016/j.bbr.2011.06.022)
- 219 Loutzenhiser L, Hadjistavropoulos H (2008) Enhancing interprofessional patient-centered practice for children with autism spectrum disorders: a pilot project with pre-licensure health students. *J Interprof Care* 22: 429-431 Doi [10.1080/13561820801886487](https://doi.org/10.1080/13561820801886487)
- 220 Lui JH, Hansen DV, Kriegstein AR (2011) Development and evolution of the human neocortex. *Cell* 146: 18-36 Doi [10.1016/j.cell.2011.06.030](https://doi.org/10.1016/j.cell.2011.06.030)
- 221 Lukose R, Schmidt E, Wolski TP, Jr., Murawski NJ, Kulesza RJ, Jr. (2011) Malformation of the superior olivary complex in an animal model of autism. *Brain Res* 1398: 102-112 Doi [10.1016/j.brainres.2011.05.013](https://doi.org/10.1016/j.brainres.2011.05.013)
- 222 Lukoshe A, White T, Schmidt MN, van der Lugt A, Hokken-Koelega AC (2013) Divergent structural brain abnormalities between different genetic subtypes of children with Prader-Willi syndrome. *J Neurodev Disord* 5: 31 Doi [10.1186/1866-1955-5-31](https://doi.org/10.1186/1866-1955-5-31)
- 223 Maddock RJ (1999) The retrosplenial cortex and emotion: new insights from functional neuroimaging of the human brain. *Trends Neurosci* 22: 310-316 Doi [S0166-2236\(98\)01374-5](https://doi.org/S0166-2236(98)01374-5) [pii]
- 224 Maddock RJ, Garrett AS, Buonocore MH (2003) Posterior cingulate cortex activation by emotional words: fMRI evidence from a valence decision task. *Hum Brain Mapp* 18: 30-41 Doi [10.1002/hbm.10075](https://doi.org/10.1002/hbm.10075)
- 225 Maddock RJ, Garrett AS, Buonocore MH (2001) Remembering familiar people: the posterior cingulate cortex and autobiographical memory retrieval. *Neuroscience* 104: 667-676 Doi [S0306-4522\(01\)00108-7](https://doi.org/S0306-4522(01)00108-7) [pii]
- 226 Magri L, Cominelli M, Cambiaghi M, Cursi M, Leocani L, Minicucci F, Poliani PL, Galli R (2013) Timing of mTOR activation affects tuberous sclerosis complex neuropathology in mouse models. *Dis Model Mech* 6: 1185-1197 Doi [10.1242/dmm.012096](https://doi.org/10.1242/dmm.012096)
- 227 Maillard AM, Ruef A, Pizzagalli F, Migliavacca E, Hippolyte L, Adaszewski S, Dukart J, Ferrari C, Conus P, Mannik K, et al (2015) The 16p11.2 locus modulates brain structures common to autism, schizophrenia and obesity. *Mol Psychiatry* 20: 140-147 Doi [10.1038/mp.2014.145](https://doi.org/10.1038/mp.2014.145)
- 228 Main SL, Kulesza RJ (2017) Repeated prenatal exposure to valproic acid results in cerebellar hypoplasia and ataxia. *Neuroscience* 340: 34-47 Doi [10.1016/j.neuroscience.2016.10.052](https://doi.org/10.1016/j.neuroscience.2016.10.052)
- 229 Martínez-Cerdeño V, Camacho J, Fox E, Miller E, Ariza J, Kienzle D, Plank K, Noctor SC, Van de Water J (2016) Prenatal exposure to autism-specific maternal autoantibodies alters proliferation of cortical neural precursor cells, enlarges brain, and increases neuronal size in adult animals. *Cereb Cortex* 26: 374-383 Doi [10.1093/cercor/bhu291](https://doi.org/10.1093/cercor/bhu291)
- 230 Maynard KR, Stein E (2012) DSCAM contributes to dendrite arborization and spine formation in the developing cerebral cortex. *J Neurosci* 32: 16637-16650 Doi [10.1523/JNEUROSCI.2811-12.2012](https://doi.org/10.1523/JNEUROSCI.2811-12.2012)
- 231 Mazina V, Gerdts J, Trinh S, Ankenman K, Ward T, Dennis MY, Girirajan S, Eichler EE, Bernier R (2015) Epigenetics of autism-related impairment: copy number variation and maternal infection. *J Dev Behav Pediatr* 36: 61-67 Doi [10.1097/DBP.0000000000000126](https://doi.org/10.1097/DBP.0000000000000126)
- 232 McKenna WL, Betancourt J, Larkin KA, Abrams B, Guo C, Rubenstein JL, Chen B (2011) Tbr1 and Fezf2 regulate alternate corticofugal neuronal identities during neocortical development. *J Neurosci* 31: 549-564 Doi [10.1523/JNEUROSCI.4131-10.2011](https://doi.org/10.1523/JNEUROSCI.4131-10.2011)
- 233 McKinney BC, Grossman AW, Elisseeu NM, Greenough WT (2005) Dendritic spine abnormalities in the occipital cortex of C57BL/6 Fmr1 knockout mice. *Am J Med Genet B Neuropsychiatr Genet* 136B: 98-102 Doi [10.1002/ajmg.b.30183](https://doi.org/10.1002/ajmg.b.30183)
- 234 Meechan DW, Tucker ES, Maynard TM, LaMantia AS (2009) Diminished dosage of 22q11 genes disrupts neurogenesis and cortical development in a mouse model of 22q11 deletion/DiGeorge syndrome. *Proc Natl Acad Sci U S A* 106: 16434-16445 Doi [10.1073/pnas.0905696106](https://doi.org/10.1073/pnas.0905696106)
- 235 Mei Y, Monteiro P, Zhou Y, Kim JA, Gao X, Fu Z, Feng G (2016) Adult restoration of Shank3 expression rescues selective autistic-like phenotypes. *Nature* 530: 481-484 Doi [10.1038/nature16971](https://doi.org/10.1038/nature16971)
- 236 Meikle L, Talos DM, Onda H, Pollizzi K, Rotenberg A, Sahin M, Jensen FE, Kwiatkowski DJ (2007) A mouse model of tuberous sclerosis: neuronal loss of Tsc1 causes dysplastic and ectopic neurons, reduced myelination, seizure activity, and limited survival. *J Neurosci* 27: 5546-5558 Doi [10.1523/JNEUROSCI.5540-06.2007](https://doi.org/10.1523/JNEUROSCI.5540-06.2007)

- 237 Mercer RE, Kwolek EM, Bischof JM, van Eede M, Henkelman RM, Wevrick R (2009) Regionally reduced brain volume, altered serotonin neurochemistry, and abnormal behavior in mice null for the circadian rhythm output gene *Magel2*. *Am J Med Genet B Neuropsychiatr Genet* 150B: 1085-1099 Doi [10.1002/ajmg.b.30934](https://doi.org/10.1002/ajmg.b.30934)
- 238 Miller EK, Cohen JD (2001) An integrative theory of prefrontal cortex function. *Annu Rev Neurosci* 24: 167-202 Doi [10.1146/annurev.neuro.24.1.167](https://doi.org/10.1146/annurev.neuro.24.1.167)
- 239 Miller JL, Couch JA, Schmalfuss I, He G, Liu Y, Driscoll DJ (2007) Intracranial abnormalities detected by three-dimensional magnetic resonance imaging in Prader-Willi syndrome. *Am J Med Genet A* 143A: 476-483 Doi [10.1002/ajmg.a.31508](https://doi.org/10.1002/ajmg.a.31508)
- 240 Miller VM, Gupta D, Neu N, Cotroneo A, Boulay CB, Seegal RF (2013) Novel inter-hemispheric white matter connectivity in the BTBR mouse model of autism. *Brain Res* 1513: 26-33 Doi [10.1016/j.brainres.2013.04.001](https://doi.org/10.1016/j.brainres.2013.04.001)
- 241 Minschew NJ, Keller TA (2010) The nature of brain dysfunction in autism: functional brain imaging studies. *Curr Opin Neurol* 23: 124-130 Doi [10.1097/WCO.0b013e32833782d4](https://doi.org/10.1097/WCO.0b013e32833782d4)
- 242 Missler M, Zhang W, Rohlmann A, Kattenstroth G, Hammer RE, Gottmann K, Südhof TC (2003) Alpha-neurexins couple Ca<sup>2+</sup> channels to synaptic vesicle exocytosis. *Nature* 423: 939-948 Doi [10.1038/nature01755](https://doi.org/10.1038/nature01755)
- 243 Mizuguchi M, Takashima S (2001) Neuropathology of tuberous sclerosis. *Brain Dev* 23: 508-515
- 244 Morgan JT, Barger N, Amaral DG, Schumann CM (2014) Stereological study of amygdala glial populations in adolescents and adults with autism spectrum disorder. *PLoS One* 9: e110356 Doi [10.1371/journal.pone.0110356](https://doi.org/10.1371/journal.pone.0110356)
- 245 Morgan JT, Chana G, Abramson I, Semendeferi K, Courchesne E, Everall IP (2012) Abnormal microglial-neuronal spatial organization in the dorsolateral prefrontal cortex in autism. *Brain Res* 1456: 72-81 Doi [10.1016/j.brainres.2012.03.036](https://doi.org/10.1016/j.brainres.2012.03.036)
- 246 Mountcastle VB (1997) The columnar organization of the neocortex. *Brain* 120 ( Pt 4): 701-722
- 247 Mowery TM, Wilson SM, Kostylev PV, Dina B, Buchholz JB, Prieto AL, Garraghty PE (2015) Embryological exposure to valproic acid disrupts morphology of the deep cerebellar nuclei in a sexually dimorphic way. *Int J Dev Neurosci* 40: 15-23 Doi [10.1016/j.ijdevneu.2014.10.003](https://doi.org/10.1016/j.ijdevneu.2014.10.003)
- 248 Mukaetova-Ladinska EB, Arnold H, Jaros E, Perry R, Perry E (2004) Depletion of MAP2 expression and laminar cytoarchitectonic changes in dorsolateral prefrontal cortex in adult autistic individuals. *Neuropathol Appl Neurobiol* 30: 615-623 Doi [10.1111/j.1365-2990.2004.00574.x](https://doi.org/10.1111/j.1365-2990.2004.00574.x)
- 249 Mukai J, Dhillon A, Drew LJ, Stark KL, Cao L, MacDermott AB, Karayiorgou M, Gogos JA (2008) Palmitoylation-dependent neurodevelopmental deficits in a mouse model of 22q11 microdeletion. *Nat Neurosci* 11: 1302-1310 Doi [10.1038/nn.2204](https://doi.org/10.1038/nn.2204)
- 250 Mychasiuk R, Richards S, Nakahashi A, Kolb B, Gibb R (2012) Effects of rat prenatal exposure to valproic acid on behaviour and neuro-anatomy. *Dev Neurosci* 34: 268-276 Doi [10.1159/000341786](https://doi.org/10.1159/000341786)
- 251 Nagaoka A, Takehara H, Hayashi-Takagi A, Noguchi J, Ishii K, Shirai F, Yagishita S, Akagi T, Ichiki T, Kasai H (2016) Abnormal intrinsic dynamics of dendritic spines in a fragile X syndrome mouse model in vivo. *Sci Rep* 6: 26651 Doi [10.1038/srep26651](https://doi.org/10.1038/srep26651)
- 252 Naisbitt S, Kim E, Tu JC, Xiao B, Sala C, Valtschanoff J, Weinberg RJ, Worley PF, Sheng M (1999) Shank, a novel family of postsynaptic density proteins that binds to the NMDA receptor/PSD-95/GKAP complex and cortactin. *Neuron* 23: 569-582 Doi [S0896-6273\(00\)80809-0](https://doi.org/S0896-6273(00)80809-0) [pii]
- 253 Nakatani J, Tamada K, Hatanaka F, Ise S, Ohta H, Inoue K, Tomonaga S, Watanabe Y, Chung YJ, Banerjee R, et al (2009) Abnormal behavior in a chromosome-engineered mouse model for human 15q11-13 duplication seen in autism. *Cell* 137: 1235-1246 Doi [10.1016/j.cell.2009.04.024](https://doi.org/10.1016/j.cell.2009.04.024)
- 254 Neale BM, Kou Y, Liu L, Ma'ayan A, Samocha KE, Sabo A, Lin CF, Stevens C, Wang LS, Makarov V, et al (2012) Patterns and rates of exonic de novo mutations in autism spectrum disorders. *Nature* 485: 242-245 Doi [10.1038/nature11011](https://doi.org/10.1038/nature11011)
- 255 Neuhofer D, Henstridge CM, Dudok B, Sepers M, Lassalle O, Katona I, Manzoni OJ (2015) Functional and structural deficits at accumbens synapses in a mouse model of Fragile X. *Front Cell Neurosci* 9: 100 Doi [10.3389/fncel.2015.00100](https://doi.org/10.3389/fncel.2015.00100)
- 256 Nimchinsky EA, Gilissen E, Allman JM, Perl DP, Erwin JM, Hof PR (1999) A neuronal morphologic type unique to humans and great apes. *Proc Natl Acad Sci U S A* 96: 5268-5273
- 257 Nimchinsky EA, Oberlander AM, Svoboda K (2001) Abnormal development of dendritic spines in FMR1 knock-out mice. *J Neurosci* 21: 5139-5146
- 258 Nimchinsky EA, Vogt BA, Morrison JH, Hof PR (1995) Spindle neurons of the human anterior cingulate cortex. *J Comp Neurol* 355: 27-37
- 259 Nordahl CW, Braunschweig D, Iosif AM, Lee A, Rogers S, Ashwood P, Amaral DG, Van de Water J (2013) Maternal autoantibodies are associated with abnormal brain enlargement in a subgroup of children with autism spectrum disorder. *Brain Behav Immun* 30: 61-65 Doi [10.1016/j.bbi.2013.01.084](https://doi.org/10.1016/j.bbi.2013.01.084)

- 260 Nuber U, Schwarz SE, Scheffner M (1998) The ubiquitin-protein ligase E6-associated protein (E6-AP) serves as its own substrate. *Eur J Biochem* 254: 643-649
- 261 O'Roak BJ, Vives L, Girirajan S, Karakoc E, Krumm N, Coe BP, Levy R, Ko A, Lee C, Smith JD, et al (2012) Sporadic autism exomes reveal a highly interconnected protein network of de novo mutations. *Nature* 485: 246-250 Doi [10.1038/nature10989](https://doi.org/10.1038/nature10989)
- 262 Oblak AL, Rosene DL, Kemper TL, Bauman ML, Blatt GJ (2011) Altered posterior cingulate cortical cytoarchitecture, but normal density of neurons and interneurons in the posterior cingulate cortex and fusiform gyrus in autism. *Autism Res*: Doi [10.1002/aur.188](https://doi.org/10.1002/aur.188)
- 263 Ohnishi T, Matsuda H, Hashimoto T, Kunihiro T, Nishikawa M, Uema T, Sasaki M (2000) Abnormal regional cerebral blood flow in childhood autism. *Brain* 123 ( Pt 9): 1838-1844
- 264 Ohno T, Maeda H, Murabe N, Kamiyama T, Yoshioka N, Mishina M, Sakurai M (2010) Specific involvement of postsynaptic GluN2B-containing NMDA receptors in the developmental elimination of corticospinal synapses. *Proc Natl Acad Sci U S A* 107: 15252-15257 Doi [10.1073/pnas.0906551107](https://doi.org/10.1073/pnas.0906551107)
- 265 Olde Loohuis NF, Kole K, Glennon JC, Karel P, Van der Borg G, Van Gemert Y, Van den Bosch D, Meinhardt J, Kos A, Shahabipour F, et al (2015) Elevated microRNA-181c and microRNA-30d levels in the enlarged amygdala of the valproic acid rat model of autism. *Neurobiol Dis* 80: 42-53 Doi [10.1016/j.nbd.2015.05.006](https://doi.org/10.1016/j.nbd.2015.05.006)
- 266 Olmos-Serrano JL, Paluszkiwicz SM, Martin BS, Kaufmann WE, Corbin JG, Huntsman MM (2010) Defective GABAergic neurotransmission and pharmacological rescue of neuronal hyperexcitability in the amygdala in a mouse model of fragile X syndrome. *J Neurosci* 30: 9929-9938 Doi [10.1523/JNEUROSCI.1714-10.2010](https://doi.org/10.1523/JNEUROSCI.1714-10.2010)
- 267 Osorio N, Alcaraz G, Padilla F, Couraud F, Delmas P, Crest M (2005) Differential targeting and functional specialization of sodium channels in cultured cerebellar granule cells. *J Physiol* 569: 801-816 Doi [10.1113/jphysiol.2005.097022](https://doi.org/10.1113/jphysiol.2005.097022)
- 268 Ospina MB, Krebs Seida J, Clark B, Karkhaneh M, Hartling L, Tjosvold L, Vandermeer B, Smith V (2008) Behavioural and developmental interventions for autism spectrum disorder: a clinical systematic review. *PLoS One* 3: e3755 Doi [10.1371/journal.pone.0003755](https://doi.org/10.1371/journal.pone.0003755)
- 269 Ozkan ED, Creson TK, Kramar EA, Rojas C, Seese RR, Babyan AH, Shi Y, Lucero R, Xu X, Noebels JL, et al (2014) Reduced cognition in Syngap1 mutants is caused by isolated damage within developing forebrain excitatory neurons. *Neuron* 82: 1317-1333 Doi [10.1016/j.neuron.2014.05.015](https://doi.org/10.1016/j.neuron.2014.05.015)
- 270 Pagani M, Damiano M, Galbusera A, Tsaftaris SA, Gozzi A (2016) Semi-automated registration-based anatomical labelling, voxel based morphometry and cortical thickness mapping of the mouse brain. *J Neurosci Methods* 267: 62-73 Doi [10.1016/j.jneumeth.2016.04.007](https://doi.org/10.1016/j.jneumeth.2016.04.007)
- 271 Pagliardini S, Ren J, Wevrick R, Greer JJ (2005) Developmental abnormalities of neuronal structure and function in prenatal mice lacking the prader-willi syndrome gene *necdin*. *Am J Pathol* 167: 175-191 Doi [10.1016/S0002-9440\(10\)62964-1](https://doi.org/10.1016/S0002-9440(10)62964-1)
- 272 Pagnamenta AT, Wing K, Sadighi Akha E, Knight SJ, Bolte S, Schmotzer G, Duketis E, Poustka F, Klauck SM, Poustka A, et al (2009) A 15q13.3 microdeletion segregating with autism. *Eur J Hum Genet* 17: 687-692 Doi [10.1038/ejhg.2008.228](https://doi.org/10.1038/ejhg.2008.228)
- 273 Pan F, Aldridge GM, Greenough WT, Gan WB (2010) Dendritic spine instability and insensitivity to modulation by sensory experience in a mouse model of fragile X syndrome. *Proc Natl Acad Sci U S A* 107: 17768-17773 Doi [10.1073/pnas.1012496107](https://doi.org/10.1073/pnas.1012496107)
- 274 Paronett EM, Meechan DW, Karpinski BA, LaMantia AS, Maynard TM (2015) *Ranbp1*, deleted in DiGeorge/22q11.2 deletion syndrome, is a microcephaly gene that selectively disrupts layer 2/3 cortical projection neuron generation. *Cereb Cortex* 25: 3977-3993 Doi [10.1093/cercor/bhu285](https://doi.org/10.1093/cercor/bhu285)
- 275 Pasciuto E, Bagni C (2014) SnapShot: FMRP mRNA targets and diseases. *Cell* 158: 1446-1446 e1441 Doi [10.1016/j.cell.2014.08.035](https://doi.org/10.1016/j.cell.2014.08.035)
- 276 Paul LK, Van Lancker-Sidtis D, Schieffer B, Dietrich R, Brown WS (2003) Communicative deficits in agenesis of the corpus callosum: nonliteral language and affective prosody. *Brain Lang* 85: 313-324
- 277 Peça J, Feliciano C, Ting JT, Wang WT, Wells MF, Venkatraman TN, Lascola CD, Fu ZY, Feng GP (2011) Shank3 mutant mice display autistic-like behaviours and striatal dysfunction. *Nature* 472: 437-442 Doi [10.1038/nature09965](https://doi.org/10.1038/nature09965)
- 278 Peñagarikano O, Abrahams BS, Herman EI, Winden KD, Gdalyahu A, Dong H, Sonnenblick LI, Gruver R, Almajano J, Bragin A, et al (2011) Absence of CNTNAP2 leads to epilepsy, neuronal migration abnormalities, and core autism-related deficits. *Cell* 147: 235-246 Doi [10.1016/j.cell.2011.08.040](https://doi.org/10.1016/j.cell.2011.08.040)
- 279 Peñagarikano O, Lazaro MT, Lu XH, Gordon A, Dong H, Lam HA, Peles E, Maidment NT, Murphy NP, Yang XW, et al (2015) Exogenous and evoked oxytocin restores social behavior in the *Cntnap2* mouse model of autism. *Sci Transl Med* 7: 271ra278 Doi [10.1126/scitranslmed.3010257](https://doi.org/10.1126/scitranslmed.3010257)
- 280 Penzes P, Cahill ME, Jones KA, VanLeeuwen JE, Woolfrey KM (2011) Dendritic spine pathology in neuropsychiatric disorders. *Nat Neurosci* 14: 285-293 Doi [10.1038/nn.2741](https://doi.org/10.1038/nn.2741)

- 281 Peters SU, Kaufmann WE, Bacino CA, Anderson AW, Adapa P, Chu Z, Yallampalli R, Traipe E, Hunter JV, Wilde EA (2011) Alterations in white matter pathways in Angelman syndrome. *Dev Med Child Neurol* 53: 361-367 Doi [10.1111/j.1469-8749.2010.03838.x](https://doi.org/10.1111/j.1469-8749.2010.03838.x)
- 282 Phelps EA, LeDoux JE (2005) Contributions of the amygdala to emotion processing: from animal models to human behavior. *Neuron* 48: 175-187 Doi [10.1016/j.neuron.2005.09.025](https://doi.org/10.1016/j.neuron.2005.09.025)
- 283 Pierce K, Haist F, Sedaghat F, Courchesne E (2004) The brain response to personally familiar faces in autism: findings of fusiform activity and beyond. *Brain* 127: 2703-2716 Doi [10.1093/brain/awh289](https://doi.org/10.1093/brain/awh289)
- 284 Pierce K, Muller RA, Ambrose J, Allen G, Courchesne E (2001) Face processing occurs outside the fusiform 'face area' in autism: evidence from functional MRI. *Brain* 124: 2059-2073
- 285 Piggot J, Kwon H, Mobbs D, Blasey C, Lotspeich L, Menon V, Bookheimer S, Reiss AL (2004) Emotional attribution in high-functioning individuals with autistic spectrum disorder: a functional imaging study. *J Am Acad Child Adolesc Psychiatry* 43: 473-480 Doi [10.1097/00004583-200404000-00014](https://doi.org/10.1097/00004583-200404000-00014)
- 286 Pinto D, Delaby E, Merico D, Barbosa M, Merikangas A, Klei L, Thiruvahindrapuram B, Xu X, Ziman R, Wang Z, et al (2014) Convergence of genes and cellular pathways dysregulated in autism spectrum disorders. *Am J Hum Genet* 94: 677-694 Doi [10.1016/j.ajhg.2014.03.018](https://doi.org/10.1016/j.ajhg.2014.03.018)
- 287 Platt RJ, Zhou Y, Slaymaker IM, Shetty AS, Weisbach NR, Kim JA, Sharma J, Desai M, Sood S, Kempton HR, et al (2017) Chd8 mutation leads to autistic-like behaviors and impaired striatal circuits. *Cell Rep* 19: 335-350 Doi [10.1016/j.celrep.2017.03.052](https://doi.org/10.1016/j.celrep.2017.03.052)
- 288 Pop AS, Levenga J, de Esch CE, Buijsen RA, Nieuwenhuizen IM, Li T, Isaacs A, Gasparini F, Oostra BA, Willemsen R (2014) Rescue of dendritic spine phenotype in Fmr1 KO mice with the mGluR5 antagonist AFQ056/Mavoglurant. *Psychopharmacology (Berl)* 231: 1227-1235 Doi [10.1007/s00213-012-2947-y](https://doi.org/10.1007/s00213-012-2947-y)
- 289 Portmann T, Yang M, Mao R, Panagiotakos G, Ellegood J, Dolen G, Bader PL, Grueter BA, Goold C, Fisher E, et al (2014) Behavioral abnormalities and circuit defects in the basal ganglia of a mouse model of 16p11.2 deletion syndrome. *Cell Rep* 7: 1077-1092 Doi [10.1016/j.celrep.2014.03.036](https://doi.org/10.1016/j.celrep.2014.03.036)
- 290 Puce A, Allison T, Bentin S, Gore JC, McCarthy G (1998) Temporal cortex activation in humans viewing eye and mouth movements. *J Neurosci* 18: 2188-2199
- 291 Pucilowska J, Vithayathil J, Tavares EJ, Kelly C, Karlo JC, Landreth GE (2015) The 16p11.2 deletion mouse model of autism exhibits altered cortical progenitor proliferation and brain cytoarchitecture linked to the ERK MAPK pathway. *J Neurosci* 35: 3190-3200 Doi [10.1523/JNEUROSCI.4864-13.2015](https://doi.org/10.1523/JNEUROSCI.4864-13.2015)
- 292 Qureshi AY, Mueller S, Snyder AZ, Mukherjee P, Berman JI, Roberts TP, Nagarajan SS, Spiro JE, Chung WK, Sherr EH, et al (2014) Opposing brain differences in 16p11.2 deletion and duplication carriers. *J Neurosci* 34: 11199-11211 Doi [10.1523/JNEUROSCI.1366-14.2014](https://doi.org/10.1523/JNEUROSCI.1366-14.2014)
- 293 Radyushkin K, Hammerschmidt K, Boretius S, Varoqueaux F, El-Kordi A, Ronnenberg A, Winter D, Frahm J, Fischer J, Brose N, et al (2009) Neuroligin-3-deficient mice: model of a monogenic heritable form of autism with an olfactory deficit. *Genes Brain Behav* 8: 416-425 Doi [10.1111/j.1601-183X.2009.00487.x](https://doi.org/10.1111/j.1601-183X.2009.00487.x)
- 294 Ramocki MB, Peters SU, Tavyev YJ, Zhang F, Carvalho CM, Schaaf CP, Richman R, Fang P, Glaze DG, Lupski JR, et al (2009) Autism and other neuropsychiatric symptoms are prevalent in individuals with MeCP2 duplication syndrome. *Ann Neurol* 66: 771-782 Doi [10.1002/ana.21715](https://doi.org/10.1002/ana.21715)
- 295 Rausch A, Zhang W, Haak KV, Mennes M, Hermans EJ, van Oort E, van Wingen G, Beckmann CF, Buitelaar JK, Groen WB (2016) Altered functional connectivity of the amygdaloid input nuclei in adolescents and young adults with autism spectrum disorder: a resting state fMRI study. *Mol Autism* 7: 13 Doi [10.1186/s13229-015-0060-x](https://doi.org/10.1186/s13229-015-0060-x)
- 296 Raymond GV, Bauman ML, Kemper TL (1996) Hippocampus in autism: a Golgi analysis. *Acta Neuropathol* 91: 117-119
- 297 Raza S, Harker A, Richards S, Kolb B, Gibb R (2015) Tactile stimulation improves neuroanatomical pathology but not behavior in rats prenatally exposed to valproic acid. *Behav Brain Res* 282: 25-36 Doi [10.1016/j.bbr.2014.12.055](https://doi.org/10.1016/j.bbr.2014.12.055)
- 298 Reith RM, McKenna J, Wu H, Hashmi SS, Cho SH, Dash PK, Gambello MJ (2013) Loss of Tsc2 in Purkinje cells is associated with autistic-like behavior in a mouse model of tuberous sclerosis complex. *Neurobiol Dis* 51: 93-103 Doi [10.1016/j.nbd.2012.10.014](https://doi.org/10.1016/j.nbd.2012.10.014)
- 299 Richards C, Jones C, Groves L, Moss J, Oliver C (2015) Prevalence of autism spectrum disorder phenomenology in genetic disorders: a systematic review and meta-analysis. *Lancet Psychiatry* 2: 909-916 Doi [10.1016/S2215-0366\(15\)00376-4](https://doi.org/10.1016/S2215-0366(15)00376-4)
- 300 Rietveld L, Stuss DP, McPhee D, Delaney KR (2015) Genotype-specific effects of Mecp2 loss-of-function on morphology of Layer V pyramidal neurons in heterozygous female Rett syndrome model mice. *Front Cell Neurosci* 9: 145 Doi [10.3389/fncel.2015.00145](https://doi.org/10.3389/fncel.2015.00145)

- 301 Rinaldi T, Silberberg G, Markram H (2008) Hyperconnectivity of local neocortical microcircuitry induced by prenatal exposure to valproic acid. *Cereb Cortex* 18: 763-770 Doi [10.1093/cercor/bhm117](https://doi.org/10.1093/cercor/bhm117)
- 302 Roberson L, Guy J, McKay L, Brockett E, Spike RC, Selfridge J, De Sousa D, Merusi C, Riedel G, Bird A, et al (2012) Morphological and functional reversal of phenotypes in a mouse model of Rett syndrome. *Brain* 135: 2699-2710 Doi [10.1093/brain/aws096](https://doi.org/10.1093/brain/aws096)
- 303 Rodier PM, Ingram JL, Tisdale B, Nelson S, Romano J (1996) Embryological origin for autism: developmental anomalies of the cranial nerve motor nuclei. *J Comp Neurol* 370: 247-261 Doi [10.1002/\(SICI\)1096-9861\(19960624\)370:2<247::AID-CNE8>3.0.CO;2-2](https://doi.org/10.1002/(SICI)1096-9861(19960624)370:2<247::AID-CNE8>3.0.CO;2-2)
- 304 Ronald A, Hoekstra RA (2011) Autism spectrum disorders and autistic traits: a decade of new twin studies. *Am J Med Genet B Neuropsychiatr Genet* 156B: 255-274 Doi [10.1002/ajmg.b.31159](https://doi.org/10.1002/ajmg.b.31159)
- 305 Rudelli RD, Brown WT, Wisniewski K, Jenkins EC, Laure-Kamionowska M, Connell F, Wisniewski HM (1985) Adult fragile X syndrome. Clinico-neuropathologic findings. *Acta Neuropathol* 67: 289-295
- 306 Rumbaugh G, Adams JP, Kim JH, Hagan RL (2006) SynGAP regulates synaptic strength and mitogen-activated protein kinases in cultured neurons. *Proc Natl Acad Sci U S A* 103: 4344-4351 Doi [10.1073/pnas.0600084103](https://doi.org/10.1073/pnas.0600084103)
- 307 Sabers A, Bertelsen FC, Scheel-Kruger J, Nyengaard JR, Moller A (2014) Long-term valproic acid exposure increases the number of neocortical neurons in the developing rat brain. A possible new animal model of autism. *Neurosci Lett* 580: 12-16 Doi [10.1016/j.neulet.2014.07.036](https://doi.org/10.1016/j.neulet.2014.07.036)
- 308 Sacco R, Gabriele S, Persico AM (2015) Head circumference and brain size in autism spectrum disorder: A systematic review and meta-analysis. *Psychiatry Res* 234: 239-251 Doi [10.1016/j.psychresns.2015.08.016](https://doi.org/10.1016/j.psychresns.2015.08.016)
- 309 Sanders SJ, Murtha MT, Gupta AR, Murdoch JD, Raubeson MJ, Willsey AJ, Ercan-Sencicek AG, DiLullo NM, Parikshak NN, Stein JL, et al (2012) De novo mutations revealed by whole-exome sequencing are strongly associated with autism. *Nature* 485: 237-241 Doi [10.1038/nature10945](https://doi.org/10.1038/nature10945)
- 310 Sandin S, Lichtenstein P, Kuja-Halkola R, Larsson H, Hultman CM, Reichenberg A (2014) The familial risk of autism. *JAMA* 311: 1770-1777 Doi [10.1001/jama.2014.4144](https://doi.org/10.1001/jama.2014.4144)
- 311 Santos M, Uppal N, Butti C, Wicinski B, Schmeidler J, Giannakopoulos P, Heinsen H, Schmitz C, Hof PR (2011) von Economo neurons in autism: A stereologic study of the fronto-insular cortex in children. *Brain Res* 1380: 206-217 Doi [10.1016/j.brainres.2010.08.067](https://doi.org/10.1016/j.brainres.2010.08.067)
- 312 Sato M, Stryker MP (2010) Genomic imprinting of experience-dependent cortical plasticity by the ubiquitin ligase gene Ube3a. *Proc Natl Acad Sci U S A* 107: 5611-5616 Doi [10.1073/pnas.1001281107](https://doi.org/10.1073/pnas.1001281107)
- 313 Sceniak MP, Lang M, Enomoto AC, Howell CJ, Hermes DJ, Katz DM (2016) Mechanisms of functional hypoconnectivity in the medial prefrontal cortex of Mecp2 null mice. *Cereb Cortex* 26: 1938-1956 Doi [10.1093/cercor/bhv002](https://doi.org/10.1093/cercor/bhv002)
- 314 Schaer M, Schmitt JE, Glaser B, Lazeyras F, Delavelle J, Eliez S (2006) Abnormal patterns of cortical gyrification in velo-cardio-facial syndrome (deletion 22q11.2): an MRI study. *Psychiatry Res* 146: 1-11 Doi [10.1016/j.psychresns.2005.10.002](https://doi.org/10.1016/j.psychresns.2005.10.002)
- 315 Schmahmann JD, Weilburg JB, Sherman JC (2007) The neuropsychiatry of the cerebellum - insights from the clinic. *Cerebellum* 6: 254-267 Doi [10.1080/14734220701490995](https://doi.org/10.1080/14734220701490995)
- 316 Schmitt JE, Vandekar S, Yi J, Calkins ME, Ruparel K, Roalf DR, Whinna D, Souders MC, Satterwaite TD, Prabhakaran K, et al (2015) Aberrant cortical morphometry in the 22q11.2 deletion syndrome. *Biol Psychiatry* 78: 135-143 Doi [10.1016/j.biopsych.2014.10.025](https://doi.org/10.1016/j.biopsych.2014.10.025)
- 317 Schultz RT, Grelotti DJ, Klin A, Kleinman J, Van der Gaag C, Marois R, Skudlarski P (2003) The role of the fusiform face area in social cognition: implications for the pathobiology of autism. *Philos Trans R Soc Lond B Biol Sci* 358: 415-427 Doi [10.1098/rstb.2002.1208](https://doi.org/10.1098/rstb.2002.1208)
- 318 Schumann CM, Amaral DG (2006) Stereological analysis of amygdala neuron number in autism. *J Neurosci* 26: 7674-7679 Doi [10.1523/JNEUROSCI.1285-06.2006](https://doi.org/10.1523/JNEUROSCI.1285-06.2006)
- 319 Schumann CM, Bloss CS, Barnes CC, Wideman GM, Carper RA, Akshoomoff N, Pierce K, Hagler D, Schork N, Lord C, et al (2010) Longitudinal magnetic resonance imaging study of cortical development through early childhood in autism. *J Neurosci* 30: 4419-4427 Doi [10.1523/JNEUROSCI.5714-09.2010](https://doi.org/10.1523/JNEUROSCI.5714-09.2010)
- 320 Schumann CM, Nordahl CW (2011) Bridging the gap between MRI and postmortem research in autism. *Brain Res* 1380: 175-186 Doi [10.1016/j.brainres.2010.09.061](https://doi.org/10.1016/j.brainres.2010.09.061)
- 321 Seeley WW (2010) Anterior insula degeneration in frontotemporal dementia. *Brain Struct Funct* 214: 465-475 Doi [10.1007/s00429-010-0263-z](https://doi.org/10.1007/s00429-010-0263-z)

- 322 Seeley WW, Allman JM, Carlin DA, Crawford RK, Macedo MN, Greicius MD, Dearmond SJ, Miller BL (2007) Divergent social functioning in behavioral variant frontotemporal dementia and Alzheimer disease: reciprocal networks and neuronal evolution. *Alzheimer Dis Assoc Disord* 21: S50-57
- 323 Seeley WW, Carlin DA, Allman JM, Macedo MN, Bush C, Miller BL, Dearmond SJ (2006) Early frontotemporal dementia targets neurons unique to apes and humans. *Ann Neurol* 60: 660-667
- 324 Sheng M, Cummings J, Roldan LA, Jan YN, Jan LY (1994) Changing subunit composition of heteromeric NMDA receptors during development of rat cortex. *Nature* 368: 144-147 Doi [10.1038/368144a0](https://doi.org/10.1038/368144a0)
- 325 Shi L, Smith SE, Malkova N, Tse D, Su Y, Patterson PH (2009) Activation of the maternal immune system alters cerebellar development in the offspring. *Brain Behav Immun* 23: 116-123 Doi [10.1016/j.bbi.2008.07.012](https://doi.org/10.1016/j.bbi.2008.07.012)
- 326 Shinawi M, Liu P, Kang SH, Shen J, Belmont JW, Scott DA, Probst FJ, Craigen WJ, Graham BH, Pursley A, et al (2010) Recurrent reciprocal 16p11.2 rearrangements associated with global developmental delay, behavioural problems, dysmorphism, epilepsy, and abnormal head size. *J Med Genet* 47: 332-341 Doi [10.1136/jmg.2009.073015](https://doi.org/10.1136/jmg.2009.073015)
- 327 Simms ML, Kemper TL, Timbie CM, Bauman ML, Blatt GJ (2009) The anterior cingulate cortex in autism: heterogeneity of qualitative and quantitative cytoarchitectonic features suggests possible subgroups. *Acta Neuropathol* 118: 673-684 Doi [10.1007/s00401-009-0568-2](https://doi.org/10.1007/s00401-009-0568-2)
- 328 Singer HS, Morris CM, Gause CD, Gillin PK, Crawford S, Zimmerman AW (2008) Antibodies against fetal brain in sera of mothers with autistic children. *J Neuroimmunol* 194: 165-172 Doi [10.1016/j.jneuroim.2007.11.004](https://doi.org/10.1016/j.jneuroim.2007.11.004)
- 329 Skefos J, Cummings C, Enzer K, Holiday J, Weed K, Levy E, Yuce T, Kemper T, Bauman M (2014) Regional alterations in Purkinje cell density in patients with autism. *PLoS One* 9: e81255 Doi [10.1371/journal.pone.0081255](https://doi.org/10.1371/journal.pone.0081255)
- 330 Smrt RD, Eaves-Egenes J, Barkho BZ, Santistevan NJ, Zhao C, Aimone JB, Gage FH, Zhao X (2007) Mecp2 deficiency leads to delayed maturation and altered gene expression in hippocampal neurons. *Neurobiol Dis* 27: 77-89 Doi [10.1016/j.nbd.2007.04.005](https://doi.org/10.1016/j.nbd.2007.04.005)
- 331 Snow WM, Hartle K, Ivanko TL (2008) Altered morphology of motor cortex neurons in the VPA rat model of autism. *Dev Psychobiol* 50: 633-639
- 332 Sosa-Diaz N, Bringas ME, Atzori M, Flores G (2014) Prefrontal cortex, hippocampus, and basolateral amygdala plasticity in a rat model of autism spectrum. *Synapse* 68: 468-473 Doi [10.1002/syn.21759](https://doi.org/10.1002/syn.21759)
- 333 Soumiya H, Fukumitsu H, Furukawa S (2011) Prenatal immune challenge compromises the normal course of neurogenesis during development of the mouse cerebral cortex. *J Neurosci Res* 89: 1575-1585 Doi [10.1002/jnr.22704](https://doi.org/10.1002/jnr.22704)
- 334 Sparks BF, Friedman SD, Shaw DW, Aylward EH, Echelard D, Artru AA, Maravilla KR, Giedd JN, Munson J, Dawson G, et al (2002) Brain structural abnormalities in young children with autism spectrum disorder. *Neurology* 59: 184-192
- 335 Srinivasan K, Leone DP, Bateson RK, Dobreva G, Kohwi Y, Kohwi-Shigematsu T, Grosschedl R, McConnell SK (2012) A network of genetic repression and derepression specifies projection fates in the developing neocortex. *Proc Natl Acad Sci U S A* 109: 19071-19078 Doi [10.1073/pnas.1216793109](https://doi.org/10.1073/pnas.1216793109)
- 336 Stark KL, Xu B, Bagchi A, Lai WS, Liu H, Hsu R, Wan X, Pavlidis P, Mills AA, Karayiorgou M, et al (2008) Altered brain microRNA biogenesis contributes to phenotypic deficits in a 22q11-deletion mouse model. *Nat Genet* 40: 751-760 Doi [10.1038/ng.138](https://doi.org/10.1038/ng.138)
- 337 Steinman KJ, Spence SJ, Ramocki MB, Proud MB, Kessler SK, Marco EJ, Green Snyder L, D'Angelo D, Chen Q, Chung WK, et al (2016) 16p11.2 deletion and duplication: Characterizing neurologic phenotypes in a large clinically ascertained cohort. *Am J Med Genet A* 170: 2943-2955 Doi [10.1002/ajmg.a.37820](https://doi.org/10.1002/ajmg.a.37820)
- 338 Stephenson DT, O'Neill SM, Narayan S, Tiwari A, Arnold E, Samaroo HD, Du F, Ring RH, Campbell B, Pletcher M, et al (2011) Histopathologic characterization of the BTBR mouse model of autistic-like behavior reveals selective changes in neurodevelopmental proteins and adult hippocampal neurogenesis. *Mol Autism* 2: 7 Doi [10.1186/2040-2392-2-7](https://doi.org/10.1186/2040-2392-2-7)
- 339 Stoner R, Chow ML, Boyle MP, Sunkin SM, Mouton PR, Roy S, Wynshaw-Boris A, Colamarino SA, Lein ES, Courchesne E (2014) Patches of disorganization in the neocortex of children with autism. *N Engl J Med* 370: 1209-1219 Doi [10.1056/NEJMoa1307491](https://doi.org/10.1056/NEJMoa1307491)
- 340 Strauss KA, Puffenberger EG, Huentelman MJ, Gottlieb S, Dobrin SE, Parod JM, Stephan DA, Morton DH (2006) Recessive symptomatic focal epilepsy and mutant contactin-associated protein-like 2. *N Engl J Med* 354: 1370-1377 Doi [10.1056/NEJMoa052773](https://doi.org/10.1056/NEJMoa052773)
- 341 Stuss DP, Boyd JD, Levin DB, Delaney KR (2012) MeCP2 mutation results in compartment-specific reductions in dendritic branching and spine density in layer 5 motor cortical neurons of YFP-H mice. *PLoS One* 7: e31896 Doi [10.1371/journal.pone.0031896](https://doi.org/10.1371/journal.pone.0031896)

- 342 Su H, Fan W, Coskun PE, Vesa J, Gold JA, Jiang YH, Potluri P, Procaccio V, Acab A, Weiss JH, et al (2011) Mitochondrial dysfunction in CA1 hippocampal neurons of the UBE3A deficient mouse model for Angelman syndrome. *Neurosci Lett* 487: 129-133 Doi [10.1016/j.neulet.2009.06.079](https://doi.org/10.1016/j.neulet.2009.06.079)
- 343 Sugathan A, Biagioli M, Golzio C, Erdin S, Blumenthal I, Manavalan P, Ragavendran A, Brand H, Lucente D, Miles J, et al (2014) CHD8 regulates neurodevelopmental pathways associated with autism spectrum disorder in neural progenitors. *Proc Natl Acad Sci U S A* 111: E4468-4477 Doi [10.1073/pnas.1405266111](https://doi.org/10.1073/pnas.1405266111)
- 344 Sykes NH, Lamb JA (2007) Autism: the quest for the genes. *Expert Rev Mol Med* 9: 1-15 Doi [10.1017/S1462399407000452](https://doi.org/10.1017/S1462399407000452)
- 345 Tabuchi K, Blundell J, Etherton MR, Hammer RE, Liu X, Powell CM, Südhof TC (2007) A neuroligin-3 mutation implicated in autism increases inhibitory synaptic transmission in mice. *Science* 318: 71-76 Doi [10.1126/science.1146221](https://doi.org/10.1126/science.1146221)
- 346 Takuma K, Hara Y, Kataoka S, Kawanai T, Maeda Y, Watanabe R, Takano E, Hayata-Takano A, Hashimoto H, Ago Y, et al (2014) Chronic treatment with valproic acid or sodium butyrate attenuates novel object recognition deficits and hippocampal dendritic spine loss in a mouse model of autism. *Pharmacol Biochem Behav* 126: 43-49 Doi [10.1016/j.pbb.2014.08.013](https://doi.org/10.1016/j.pbb.2014.08.013)
- 347 Talkowski ME, Rosenfeld JA, Blumenthal I, Pillalamarri V, Chiang C, Heilbut A, Ernst C, Hanscom C, Rossin E, Lindgren AM, et al (2012) Sequencing chromosomal abnormalities reveals neurodevelopmental loci that confer risk across diagnostic boundaries. *Cell* 149: 525-537 Doi [10.1016/j.cell.2012.03.028](https://doi.org/10.1016/j.cell.2012.03.028)
- 348 Taneja P, Ogier M, Brooks-Harris G, Schmid DA, Katz DM, Nelson SB (2009) Pathophysiology of locus ceruleus neurons in a mouse model of Rett syndrome. *J Neurosci* 29: 12187-12195 Doi [10.1523/JNEUROSCI.3156-09.2009](https://doi.org/10.1523/JNEUROSCI.3156-09.2009)
- 349 Tang G, Gudsnuk K, Kuo SH, Cotrina ML, Rosoklija G, Sosunov A, Sonders MS, Kanter E, Castagna C, Yamamoto A, et al (2014) Loss of mTOR-dependent macroautophagy causes autistic-like synaptic pruning deficits. *Neuron* 83: 1131-1143 Doi [10.1016/j.neuron.2014.07.040](https://doi.org/10.1016/j.neuron.2014.07.040)
- 350 Tang G, Gutierrez Rios P, Kuo SH, Akman HO, Rosoklija G, Tanji K, Dwork A, Schon EA, Dimauro S, Goldman J, et al (2013) Mitochondrial abnormalities in temporal lobe of autistic brain. *Neurobiol Dis* 54: 349-361 Doi [10.1016/j.nbd.2013.01.006](https://doi.org/10.1016/j.nbd.2013.01.006)
- 351 Tavazoie SF, Alvarez VA, Ridenour DA, Kwiatkowski DJ, Sabatini BL (2005) Regulation of neuronal morphology and function by the tumor suppressors Tsc1 and Tsc2. *Nat Neurosci* 8: 1727-1734 Doi [10.1038/nn1566](https://doi.org/10.1038/nn1566)
- 352 Tetreault NA, Hakeem AY, Jiang S, Williams BA, Allman E, Wold BJ, Allman JM (2012) Microglia in the cerebral cortex in autism. *J Autism Dev Disord* 42: 2569-2584 Doi [10.1007/s10803-012-1513-0](https://doi.org/10.1007/s10803-012-1513-0)
- 353 Till SM, Wijetunge LS, Seidel VG, Harlow E, Wright AK, Bagni C, Contractor A, Gillingwater TH, Kind PC (2012) Altered maturation of the primary somatosensory cortex in a mouse model of fragile X syndrome. *Hum Mol Genet* 21: 2143-2156 Doi [10.1093/hmg/dds030](https://doi.org/10.1093/hmg/dds030)
- 354 Tiwari VN, Jeong JW, Wilson BJ, Behen ME, Chugani HT, Sundaram SK (2012) Relationship between aberrant brain connectivity and clinical features in Angelman syndrome: a new method using tract based spatial statistics of DTI color-coded orientation maps. *Neuroimage* 59: 349-355 Doi [10.1016/j.neuroimage.2011.07.067](https://doi.org/10.1016/j.neuroimage.2011.07.067)
- 355 Tottenham N, Hare TA, Casey BJ (2009) A developmental perspective on human amygdala function. In: Whalen PJ, Phelps EA (eds) *The human amygdala* The Guilford Press, New York, pp 107
- 356 Tsai PT, Hull C, Chu Y, Greene-Colozzi E, Sadowski AR, Leech JM, Steinberg J, Crawley JN, Regehr WG, Sahin M (2012) Autistic-like behaviour and cerebellar dysfunction in Purkinje cell Tsc1 mutant mice. *Nature* 488: 647-651 Doi [10.1038/nature11310](https://doi.org/10.1038/nature11310)
- 357 Turk AA, Brown WS, Symington M, Paul LK (2010) Social narratives in agenesis of the corpus callosum: linguistic analysis of the Thematic Apperception Test. *Neuropsychologia* 48: 43-50 Doi [10.1016/j.neuropsychologia.2009.08.009](https://doi.org/10.1016/j.neuropsychologia.2009.08.009)
- 358 Uppal N, Gianatiempo I, Wicinski B, Schmeidler J, Heinsen H, Schmitz C, Buxbaum JD, Hof PR (2014) Neuropathology of the posteroinferior occipitotemporal gyrus in children with autism. *Mol Autism* 5: 17 Doi [10.1186/2040-2392-5-17](https://doi.org/10.1186/2040-2392-5-17)
- 359 Uppal N, Puri R, Yuk F, Janssen WG, Bozdagi-Gunal O, Harony-Nicolas H, Dickstein DL, Buxbaum JD, Hof PR (2015) Ultrastructural analyses in the hippocampus CA1 field in Shank3-deficient mice. *Mol Autism* 6: 41 Doi [10.1186/s13229-015-0036-x](https://doi.org/10.1186/s13229-015-0036-x)
- 360 Uppal N, Wicinski B, Buxbaum JD, Heinsen H, Schmitz C, Hof PR (2014) Neuropathology of the anterior midcingulate cortex in young children with autism. *J Neuropathol Exp Neurol* 73: 891-902 Doi [10.1097/NEN.0000000000000108](https://doi.org/10.1097/NEN.0000000000000108)

- 361 van Amelsvoort T, Daly E, Henry J, Robertson D, Ng V, Owen M, Murphy KC, Murphy DG (2004) Brain anatomy in adults with velocardiofacial syndrome with and without schizophrenia: preliminary results of a structural magnetic resonance imaging study. *Arch Gen Psychiatry* 61: 1085-1096 Doi [10.1001/archpsyc.61.11.1085](https://doi.org/10.1001/archpsyc.61.11.1085)
- 362 van Kooten IA, Palmen SJ, von Cappeln P, Steinbusch HW, Korr H, Heinsen H, Hof PR, van Engeland H, Schmitz C (2008) Neurons in the fusiform gyrus are fewer and smaller in autism. *Brain* 131: 987-999 Doi [10.1093/brain/awn033](https://doi.org/10.1093/brain/awn033)
- 363 Varea O, Martin-de-Saavedra MD, Kopeikina KJ, Schurmann B, Fleming HJ, Fawcett-Patel JM, Bach A, Jang S, Peles E, Kim E, et al (2015) Synaptic abnormalities and cytoplasmic glutamate receptor aggregates in contactin associated protein-like 2/Caspr2 knockout neurons. *Proc Natl Acad Sci U S A* 112: 6176-6181 Doi [10.1073/pnas.1423205112](https://doi.org/10.1073/pnas.1423205112)
- 364 Vismara LA, Colombi C, Rogers SJ (2009) Can one hour per week of therapy lead to lasting changes in young children with autism? *Autism* 13: 93-115 Doi [10.1177/1362361307098516](https://doi.org/10.1177/1362361307098516)
- 365 Vogt BA, Berger GR, Derbyshire SW (2003) Structural and functional dichotomy of human midcingulate cortex. *Eur J Neurosci* 18: 3134-3144 Doi [10.1111/j.1460-9568.2003.03034.x](https://doi.org/10.1111/j.1460-9568.2003.03034.x)
- 366 von Economo C (1926) Eine neue Art Spezialzellen des Lobus cinguli and Lobus insulae. *Zschr ges Neurol Psychiatr*: 706-712
- 367 Wahlsten D, Metten P, Crabbe JC (2003) Survey of 21 inbred mouse strains in two laboratories reveals that BTBR T/+ tf/tf has severely reduced hippocampal commissure and absent corpus callosum. *Brain Res* 971: 47-54
- 368 Wallace ML, Burette AC, Weinberg RJ, Philpot BD (2012) Maternal loss of Ube3a produces an excitatory/inhibitory imbalance through neuron type-specific synaptic defects. *Neuron* 74: 793-800 Doi [10.1016/j.neuron.2012.03.036](https://doi.org/10.1016/j.neuron.2012.03.036)
- 369 Wang CC, Held RG, Chang SC, Yang L, Delpire E, Ghosh A, Hall BJ (2011) A critical role for GluN2B-containing NMDA receptors in cortical development and function. *Neuron* 72: 789-805 Doi [10.1016/j.neuron.2011.09.023](https://doi.org/10.1016/j.neuron.2011.09.023)
- 370 Wang IT, Reyes AR, Zhou Z (2013) Neuronal morphology in MeCP2 mouse models is intrinsically variable and depends on age, cell type, and Mecp2 mutation. *Neurobiol Dis* 58: 3-12 Doi [10.1016/j.nbd.2013.04.020](https://doi.org/10.1016/j.nbd.2013.04.020)
- 371 Wang X, Bey AL, Katz BM, Badea A, Kim N, David LK, Duffney LJ, Kumar S, Mague SD, Hulbert SW, et al (2016) Altered mGluR5-Homer scaffolds and corticostriatal connectivity in a Shank3 complete knockout model of autism. *Nat Commun* 7: 11459 Doi [10.1038/ncomms11459](https://doi.org/10.1038/ncomms11459)
- 372 Wang X, McCoy PA, Rodriguiz RM, Pan Y, Je HS, Roberts AC, Kim CJ, Berrios J, Colvin JS, Bousquet-Moore D, et al (2011) Synaptic dysfunction and abnormal behaviors in mice lacking major isoforms of Shank3. *Hum Mol Genet* 20: 3093-3108 Doi [10.1093/hmg/ddr212](https://doi.org/10.1093/hmg/ddr212)
- 373 Wang X, Xu Q, Bey AL, Lee Y, Jiang YH (2014) Transcriptional and functional complexity of Shank3 provides a molecular framework to understand the phenotypic heterogeneity of SHANK3 causing autism and Shank3 mutant mice. *Mol Autism* 5: 30 Doi [10.1186/2040-2392-5-30](https://doi.org/10.1186/2040-2392-5-30)
- 374 Watanabe Y, Murakami T, Kawashima M, Hasegawa-Baba Y, Mizukami S, Imatanaka N, Akahori Y, Yoshida T, Shibutani M (2017) Maternal exposure to valproic acid primarily targets interneurons followed by late effects on neurogenesis in the hippocampal dentate gyrus in rat offspring. *Neurotox Res* 31: 46-62 Doi [10.1007/s12640-016-9660-2](https://doi.org/10.1007/s12640-016-9660-2)
- 375 Watson KK, Jones TK, Allman JM (2006) Dendritic architecture of the von Economo neurons. *Neuroscience* 141: 1107-1112
- 376 Wegiel J, Flory M, Kuchna I, Nowicki K, Ma SY, Imaki H, Cohen IL, London E, Brown WT, Wisniewski T (2014) Brain-region-specific alterations of the trajectories of neuronal volume growth throughout the lifespan in autism. *Acta Neuropathol Commun* 2: 28 Doi [10.1186/2051-5960-2-28](https://doi.org/10.1186/2051-5960-2-28)
- 377 Wegiel J, Flory M, Kuchna I, Nowicki K, Ma SY, Imaki H, Frackowiak J, Kolecka BM, Wierzba-Bobrowicz T, London E, et al (2015) Neuronal nucleus and cytoplasm volume deficit in children with autism and volume increase in adolescents and adults. *Acta Neuropathol Commun* 3: 2 Doi [10.1186/s40478-015-0183-5](https://doi.org/10.1186/s40478-015-0183-5)
- 378 Wegiel J, Flory M, Schanen NC, Cook EH, Nowicki K, Kuchna I, Imaki H, Ma SY, London E, Casanova MF, et al (2015) Significant neuronal soma volume deficit in the limbic system in subjects with 15q11.2-q13 duplications. *Acta Neuropathol Commun* 3: 63 Doi [10.1186/s40478-015-0241-z](https://doi.org/10.1186/s40478-015-0241-z)
- 379 Wegiel J, Kuchna I, Nowicki K, Imaki H, Marchi E, Ma SY, Chauhan A, Chauhan V, Bobrowicz TW, de Leon M, et al (2010) The neuropathology of autism: defects of neurogenesis and neuronal migration, and dysplastic changes. *Acta Neuropathol* 119: 755-770 Doi [10.1007/s00401-010-0655-4](https://doi.org/10.1007/s00401-010-0655-4)
- 380 Wegiel J, Kuchna I, Nowicki K, Imaki H, Wegiel J, Ma SY, Azmitia EC, Banerjee P, Flory M, Cohen IL, et al (2013) Contribution of olivofloccular circuitry developmental defects to atypical gaze in autism. *Brain Res* 1512: 106-122 Doi [10.1016/j.brainres.2013.03.037](https://doi.org/10.1016/j.brainres.2013.03.037)

- 381 Wei H, Ma Y, Ding C, Jin G, Liu J, Chang Q, Hu F, Yu L (2016) Reduced Glutamate Release in Adult BTBR Mouse Model of Autism Spectrum Disorder. *Neurochem Res* 41: 3129-3137 Doi [10.1007/s11064-016-2035-5](https://doi.org/10.1007/s11064-016-2035-5)
- 382 Weidenheim KM, Goodman L, Dickson DW, Gillberg C, Rastam M, Rapin I (2001) Etiology and pathophysiology of autistic behavior: clues from two cases with an unusual variant of neuroaxonal dystrophy. *J Child Neurol* 16: 809-819
- 383 Weir RK, Forghany R, Smith SE, Patterson PH, McAllister AK, Schumann CM, Bauman MD (2015) Preliminary evidence of neuropathology in nonhuman primates prenatally exposed to maternal immune activation. *Brain Behav Immun* 48: 139-146 Doi [10.1016/j.bbi.2015.03.009](https://doi.org/10.1016/j.bbi.2015.03.009)
- 384 Welchew DE, Ashwin E, Berkouk K, Salvador R, Suckling J, Baron-Cohen S, Bullmore E (2005) Functional disconnectivity of the medial temporal lobe in Asperger's syndrome. *Biol Psychiatry* 57: 991-998 Doi [10.1016/j.biopsych.2005.01.028](https://doi.org/10.1016/j.biopsych.2005.01.028)
- 385 Whitney ER, Kemper TL, Rosene DL, Bauman ML, Blatt GJ (2008) Calbindin-D28k is a more reliable marker of human Purkinje cells than standard Nissl stains: a stereological experiment. *J Neurosci Methods* 168: 42-47 Doi [10.1016/j.jneumeth.2007.09.009](https://doi.org/10.1016/j.jneumeth.2007.09.009)
- 386 Whitney ER, Kemper TL, Rosene DL, Bauman ML, Blatt GJ (2009) Density of cerebellar basket and stellate cells in autism: evidence for a late developmental loss of Purkinje cells. *J Neurosci Res* 87: 2245-2254 Doi [10.1002/jnr.22056](https://doi.org/10.1002/jnr.22056)
- 387 Williams RS, Hauser SL, Purpura DP, DeLong GR, Swisher CN (1980) Autism and mental retardation: neuropathologic studies performed in four retarded persons with autistic behavior. *Arch Neurol* 37: 749-753
- 388 Wilson BJ, Sundaram SK, Huq AH, Jeong JW, Halverson SR, Behen ME, Bui DQ, Chugani HT (2011) Abnormal language pathway in children with Angelman syndrome. *Pediatr Neurol* 44: 350-356 Doi [10.1016/j.pediatrneurol.2010.12.002](https://doi.org/10.1016/j.pediatrneurol.2010.12.002)
- 389 Wisniewski KE, Segan SM, Miezieski CM, Sersen EA, Rudelli RD (1991) The Fra(X) syndrome: neurological, electrophysiological, and neuropathological abnormalities. *Am J Med Genet* 38: 476-480
- 390 Wu P, Teot L, Murdoch G, Monaghan-Nichols AP, McFadden K (2014) Neuropathology of 22q11 deletion syndrome in an infant. *Pediatr Dev Pathol* 17: 386-392 Doi [10.2350/13-11-1399-CR.1](https://doi.org/10.2350/13-11-1399-CR.1)
- 391 Xu B, Hsu PK, Stark KL, Karayiorgou M, Gogos JA (2013) Derepression of a neuronal inhibitor due to miRNA dysregulation in a schizophrenia-related microdeletion. *Cell* 152: 262-275 Doi [10.1016/j.cell.2012.11.052](https://doi.org/10.1016/j.cell.2012.11.052)
- 392 Xu Y, Ye H, Shen Y, Xu Q, Zhu L, Liu J, Wu JY (2011) Dscam mutation leads to hydrocephalus and decreased motor function. *Protein Cell* 2: 647-655 Doi [10.1007/s13238-011-1072-8](https://doi.org/10.1007/s13238-011-1072-8)
- 393 Yan J, Oliveira G, Coutinho A, Yang C, Feng J, Katz C, Sram J, Bockholt A, Jones IR, Craddock N, et al (2005) Analysis of the neuroligin 3 and 4 genes in autism and other neuropsychiatric patients. *Mol Psychiatry* 10: 329-332 Doi [10.1038/sj.mp.4001629](https://doi.org/10.1038/sj.mp.4001629)
- 394 Yashiro K, Riday TT, Condon KH, Roberts AC, Bernardo DR, Prakash R, Weinberg RJ, Ehlers MD, Philpot BD (2009) Ube3a is required for experience-dependent maturation of the neocortex. *Nat Neurosci* 12: 777-783 Doi [10.1038/nn.2327](https://doi.org/10.1038/nn.2327)
- 395 Yasuda S, Sugiura H, Katsurabayashi S, Shimada T, Tanaka H, Takasaki K, Iwasaki K, Kobayashi T, Hino O, Yamagata K (2014) Activation of Rheb, but not of mTORC1, impairs spine synapse morphogenesis in tuberous sclerosis complex. *Sci Rep* 4: 5155 Doi [10.1038/srep05155](https://doi.org/10.1038/srep05155)
- 396 Yi JJ, Berrios J, Newbern JM, Snider WD, Philpot BD, Hahn KM, Zylka MJ (2015) An autism-linked mutation disables phosphorylation control of UBE3A. *Cell* 162: 795-807 Doi [10.1016/j.cell.2015.06.045](https://doi.org/10.1016/j.cell.2015.06.045)
- 397 Zerbo O, Iosif AM, Walker C, Ozonoff S, Hansen RL, Hertz-Picciotto I (2013) Is maternal influenza or fever during pregnancy associated with autism or developmental delays? Results from the CHARGE (CHildhood Autism Risks from Genetics and Environment) study. *J Autism Dev Disord* 43: 25-33 Doi [10.1007/s10803-012-1540-x](https://doi.org/10.1007/s10803-012-1540-x)
- 398 Zhou Y, Kaiser T, Monteiro P, Zhang X, Van der Goes MS, Wang D, Barak B, Zeng M, Li C, Lu C, et al (2016) Mice with Shank3 mutations associated with ASD and schizophrenia display both shared and distinct defects. *Neuron* 89: 147-162 Doi [10.1016/j.neuron.2015.11.023](https://doi.org/10.1016/j.neuron.2015.11.023)
